# Supplementary material for: PRMT5 activates AKT via methylation to promote tumor metastasis
Source: PubMed Central journal article supplement (PMC9270419; doi:10.1038/s41467-022-31645-1), 2022-07-08

**Table S1. Antibodies and antibody/lipids-coated beads used in this study**

| <b>Name</b>                                                       | <b>Vendor</b>             | <b>Catalog Number</b> |
|-------------------------------------------------------------------|---------------------------|-----------------------|
| AKT                                                               | Cell Signaling Technology | 9272                  |
| AKT1                                                              | Cell Signaling Technology | 2938                  |
| AKT2                                                              | Cell Signaling Technology | 3063                  |
| AKT3                                                              | Cell Signaling Technology | 14982                 |
| phospho-AKT Ser 473                                               | Cell Signaling Technology | 4060                  |
| phospho-Akt Thr308                                                | Cell Signaling Technology | 13038                 |
| phospho-AKT1 Ser 473                                              | Cell Signaling Technology | 9018                  |
| phospho-AKT2 Ser 474                                              | Cell Signaling Technology | 8599                  |
| Symmetric Di-Methyl Arginine Motif [sdme-RG] MultiMab™ Rabbit mAb | Cell Signaling Technology | 13222                 |
| Anti-dimethyl-arginine antibody, symmetric, (SYM10)               | Sigma-Aldrich             | 07-412                |
| DNA-PK                                                            | Cell Signaling Technology | 38168                 |
| EGFR                                                              | Cell Signaling Technology | 4267                  |
| phospho-EGFR Tyr 1068                                             | Cell Signaling Technology | 3777                  |
| ErbB3                                                             | Cell Signaling Technology | 12708                 |
| p-ErbB3 Tyr1289                                                   | Cell Signaling Technology | 4791                  |
| FGFR4                                                             | Cell Signaling Technology | 8562                  |
| VGFR2                                                             | Cell Signaling Technology | 9698                  |
| p-VGFR2 Tyr 1059                                                  | Cell Signaling Technology | 3817                  |
| IGF-1 Receptor beta                                               | Cell Signaling Technology | 9750                  |
| phospho-IGF-1 beta Tyr1316                                        | Cell Signaling Technology | 28897                 |
| GSK-3 $\alpha$                                                    | Cell Signaling Technology | 4818                  |
| GSK-3 $\beta$                                                     | Cell Signaling Technology | 12456                 |
| phospho-GSK-3 $\alpha$ Ser21                                      | Cell Signaling Technology | 9316                  |
| phospho-GSK-3 $\beta$ Ser9                                        | Cell Signaling Technology | 5558                  |
| Flag                                                              | Sigma-Aldrich             | F7425                 |
| anti-HA-Peroxidase                                                | Sigma-Aldrich             | 12013819001           |
| phospho-(Ser/Thr) Phe                                             | Cell Signaling Technology | 9631                  |
| phospho-Tyr-1000                                                  | Cell Signaling Technology | 8954                  |
| p75NTR                                                            | Cell Signaling Technology | 8238                  |
| PDK1                                                              | Cell Signaling Technology | 3062                  |
| PP2A A subunit                                                    | Cell Signaling Technology | 2041T                 |
| PP2A B subunit                                                    | Cell Signaling Technology | 2290T                 |
| PP2A C subunit                                                    | Cell Signaling Technology | 2259T                 |
| PRMT5                                                             | Santa Cruz Biotechnology  | sc-376937             |
| PTEN                                                              | Cell Signaling Technology | 9188                  |
| Rictor                                                            | Cell Signaling Technology | 9476                  |
| Phospho-Rictor Thr 1135                                           | Cell Signaling Technology | 3806                  |
| PRMT9                                                             | Bethyl Laboratories       | A304-189A             |
| ZEB1                                                              | Cell Signaling Technology | 70512                 |

|                                                         |                           |           |
|---------------------------------------------------------|---------------------------|-----------|
| SNAIL                                                   | Cell Signaling Technology | 3879      |
| TWIST1                                                  | Cell Signaling Technology | 69366     |
| SIN1                                                    | Cell Signaling Technology | 12860     |
| Mouse anti-rabbit IgG-HRP                               | Santa Cruz Biotechnology  | sc-2357   |
| Mouse IgGκ BP-HRP                                       | Santa Cruz Biotechnology  | sc-516102 |
| Anti-rabbit IgG, HRP-linked antibody                    | Cell Signaling Technology | 7074      |
| Normal rabbit IgG                                       | Cell Signaling Technology | 2729      |
| Alexa Fluor 488-conjugated goat anti-rabbit             | ThermoFisher              | A32731    |
| Alexa Fluor 594-conjugated goat anti-mouse              | ThermoFisher              | A11032    |
| Mouse monoclonal anti-HA antibody-coated magnetic beads | ThermoFisher              | 88836     |
| Phosphatidylserine agarose beads                        | Echelon Biosciences       | P-B0PS    |

**Table S2. Mouse Blood Chemistry Test**

| Test Item | Samples |      |      |        |      |      |
|-----------|---------|------|------|--------|------|------|
|           | Vehicle |      |      | GSK595 |      |      |
| ALB       | 3.7     | 4.1  | 3.5  | 3.5    | 3.1  | 3.7  |
| ALP       | 37      | 29   | 26   | 61     | 30   | 27   |
| ALT       | 52      | 59   | 44   | 25     | 30   | 27   |
| AMY       | 860     | 1216 | 1564 | 798    | 730  | 795  |
| TBIL      | 0.4     | 102  | 0.9  | 0.5    | 1.3  | 0.5  |
| BUN       | 20      | 32   | 53   | 16     | 30   | 15   |
| CA        | 10.9    | 11.4 | 10.4 | 10.5   | 10.7 | 10.9 |
| PHOS      | 8       | 8    | 10.6 | 9.8    | 8.9  | 7.7  |
| CRE       | 0.2     | 0.2  | 0.5  | 0.5    | <0.2 | <0.2 |
| GLU       | 260     | 185  | 163  | 171    | 200  | 165  |
| TP        | 5.4     | 5.6  | 4.4  | 5.1    | 4.9  | 4.9  |
| GLOB      | 1.6     | 1.5  | 0.9  | 1.6    | 1.8  | 1.2  |

ALB: albumin; ALP: alkaline phosphatase; ALT: alanine aminotransferase; AMY: amylase; TBIL: total bilirubin test; BUN: blood urea nitrogen; CA: calcium; PHOS: phosphorus; CRE: creatinine; GLU: glucose; TP: total protein; GLOB: globulin

**Table S3. Bioluminescent intensity of xenografts prior to and at the end of treatment**

| Cell lines         | Bioluminescent Intensity (total flux, pixel/second) |          |          |          |
|--------------------|-----------------------------------------------------|----------|----------|----------|
|                    | DMSO                                                |          | GSK595   |          |
|                    | Day 0                                               | Day 14   | Day 0    | Day 14   |
| CHLA20-iRFP720-LUC | 1.15E+07                                            | 2.44E+09 | 3.05E+07 | 1.25E+08 |
|                    | 6.95E+07                                            | 3.07E+09 | 9.75E+07 | 2.36E+08 |
|                    | 9.43E+06                                            | 9.70E+08 | 1.96E+07 | 1.23E+08 |
|                    | 2.71E+07                                            | 1.30E+09 | 1.66E+07 | 1.26E+08 |
|                    | 3.41E+07                                            | 1.03E+09 | 3.62E+07 | 1.39E+08 |
|                    | 1.12E+08                                            | 5.06E+09 | 6.02E+07 | 3.49E+09 |
|                    | 1.62E+07                                            | 7.73E+09 | 2.55E+07 | 5.10E+08 |
|                    | 6.74E+07                                            | 9.01E+09 | 2.12E+07 | 2.01E+08 |
|                    | 7.11E+07                                            | 4.20E+09 | 3.13E+07 | 5.54E+08 |
|                    |                                                     |          | 4.66E+07 | 2.90E+08 |
| NGP-iRFP720-LUC    | 3.45E+07                                            | 1.10E+09 | 2.24E+07 | 5.28E+08 |
|                    | 2.18E+07                                            | 9.34E+08 | 9.00E+06 | 1.09E+08 |
|                    | 9.15E+06                                            | 1.54E+09 | 8.23E+07 | 2.76E+08 |
|                    | 5.35E+07                                            | 1.38E+09 | 1.62E+07 | 4.60E+08 |
|                    | 3.03E+08                                            | 7.08E+09 | 1.24E+08 | 2.04E+09 |
|                    | 9.75E+07                                            | 6.28E+09 | 7.99E+07 | 5.65E+08 |
|                    | 1.26E+08                                            | 4.21E+09 | 1.22E+07 | 2.18E+08 |
|                    |                                                     |          | 2.25E+07 | 8.60E+08 |
|                    |                                                     |          | 7.76E+06 | 1.02E+08 |

Supplementary Figure 1

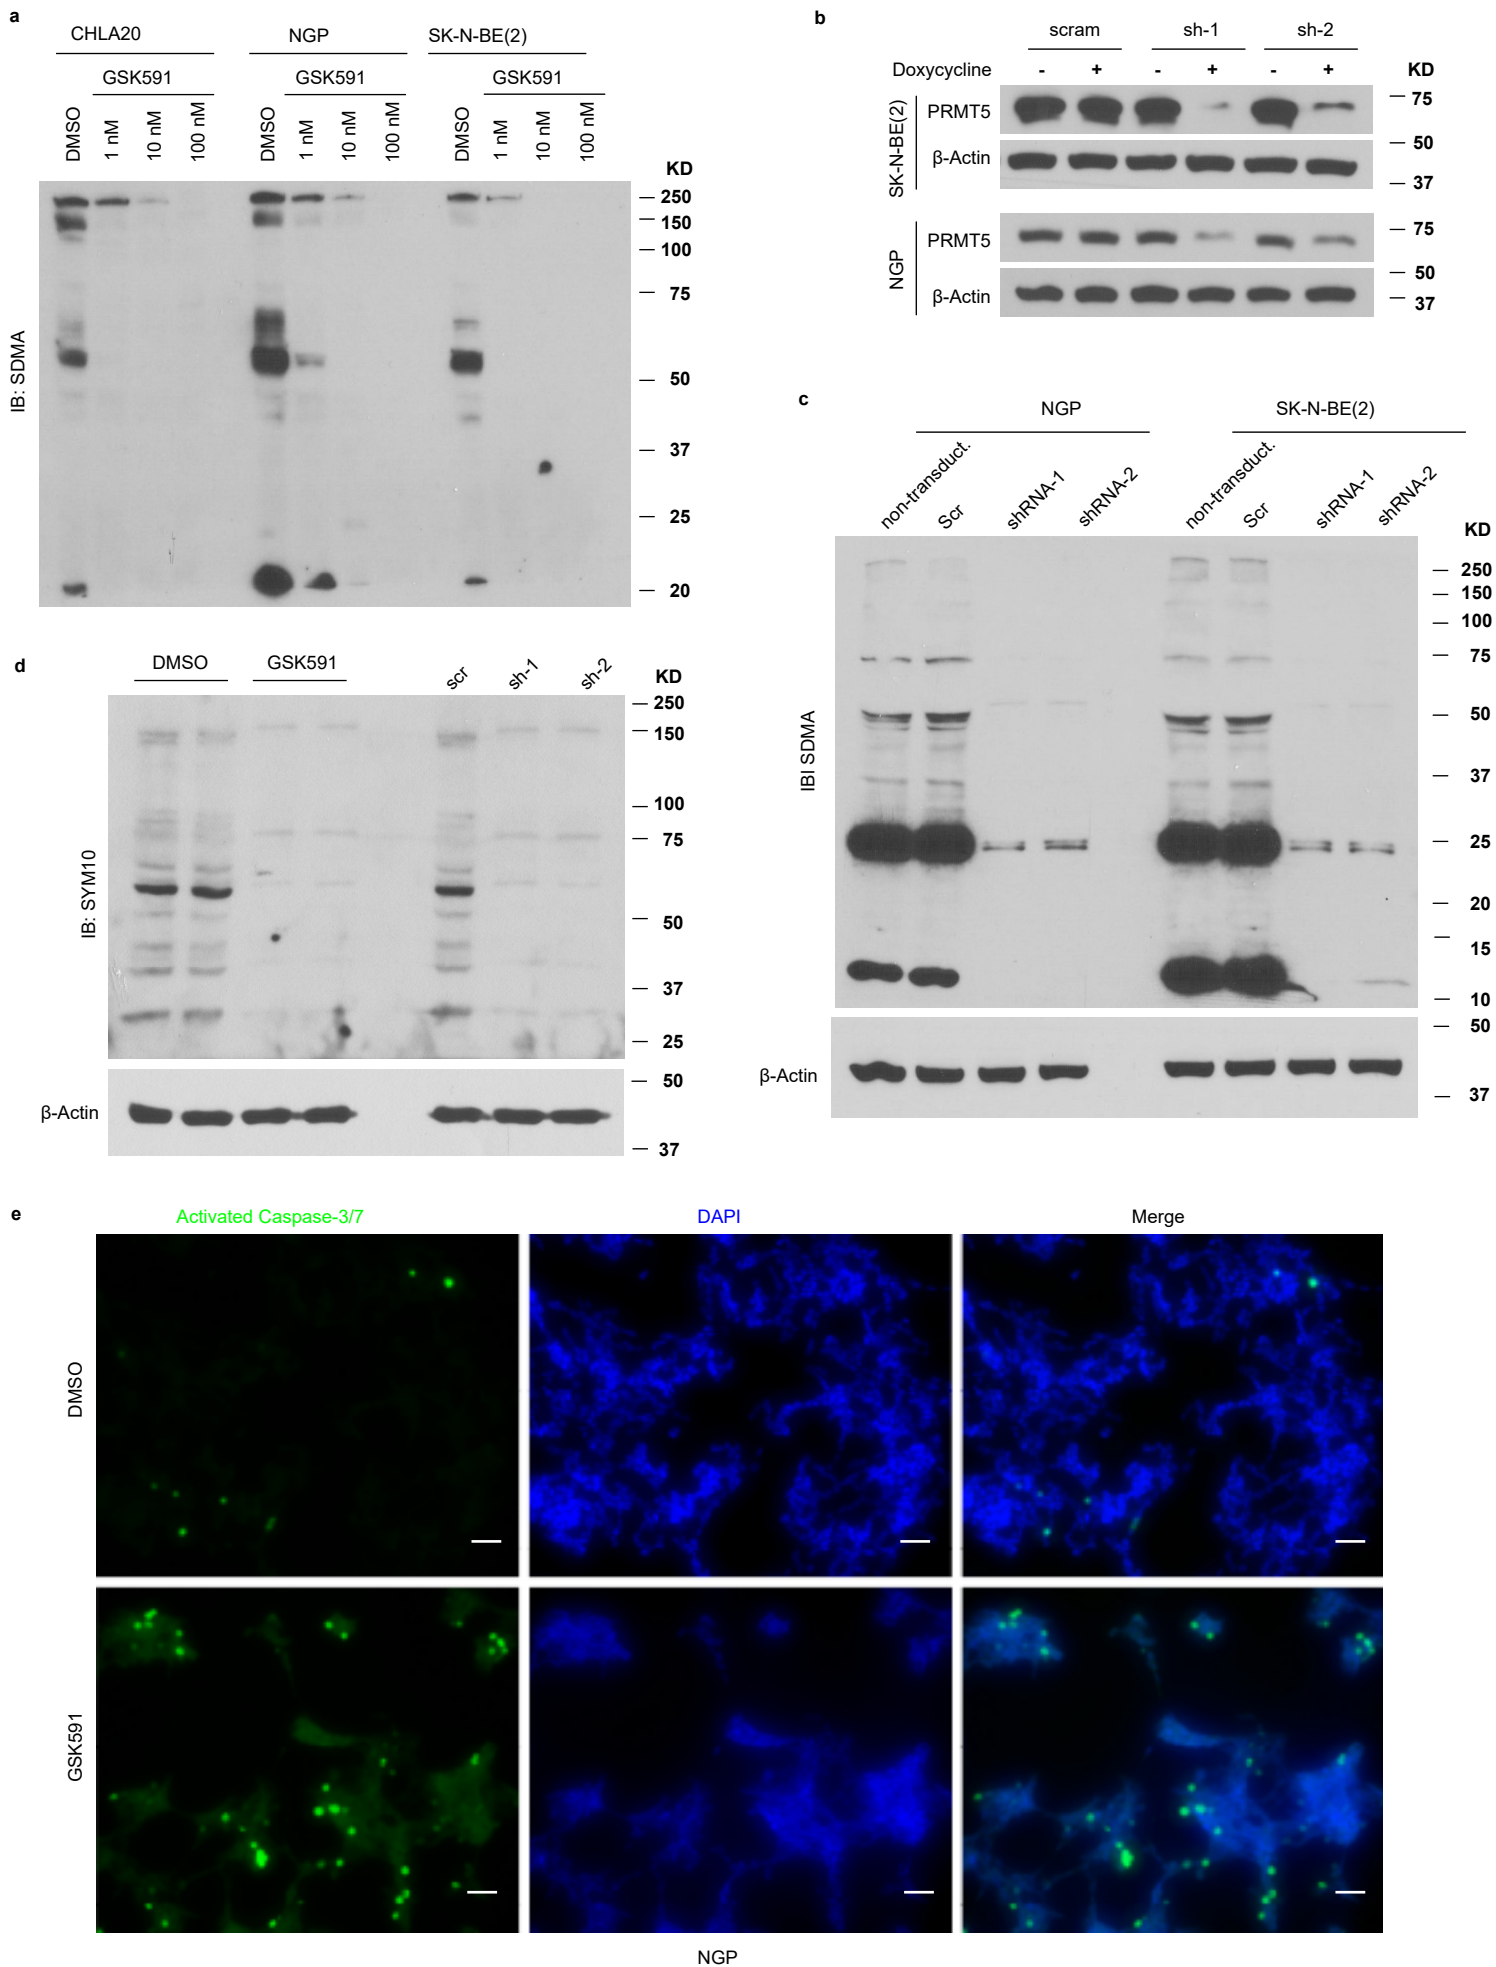

**Fig. S1. PRMT5 inhibition decreases SDMA and induces apoptosis in neuroblastoma cells. a,** Immunoblotting of SDMA with Cell Signaling antibody in neuroblastoma cells treated with DMSO or increasing doses of GSK591. **b,** PRMT5 knockdown efficiency was detected by Western blotting in scramble or PRMT5 knockdown cells in the absence or presence of doxycycline. **c,** SDMA in control and PRMT5 knockdown cells. **d,** Western blotting analysis of SDMA using an additional antibody (SYM10) against SDMA in CHLA 20 cells treated with DMSO or GSK591, and SK-N-BE(2) cells transduced with scramble or two shRNAs targeting PRMT5. **e,** Caspase-3/7 staining in NGP cells treated with DMSO or GSK591. Scale bars, 100  $\mu$ m. All the results shown here were representative of three independent experiments. Uncropped immunoblots were provided in Source Data file.

Supplementary Figure 2

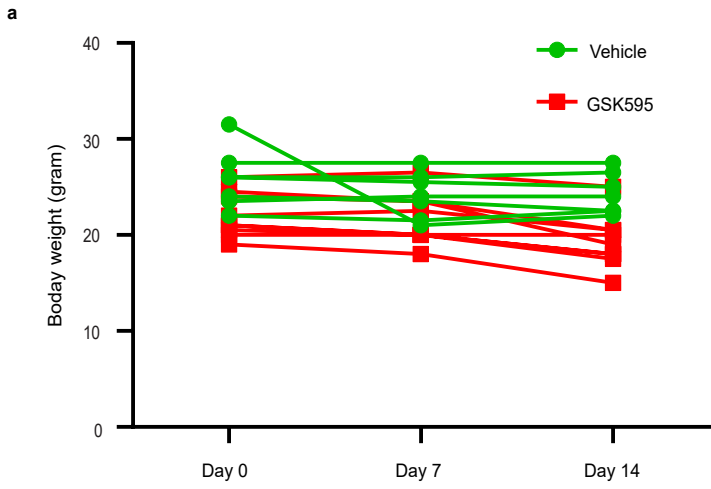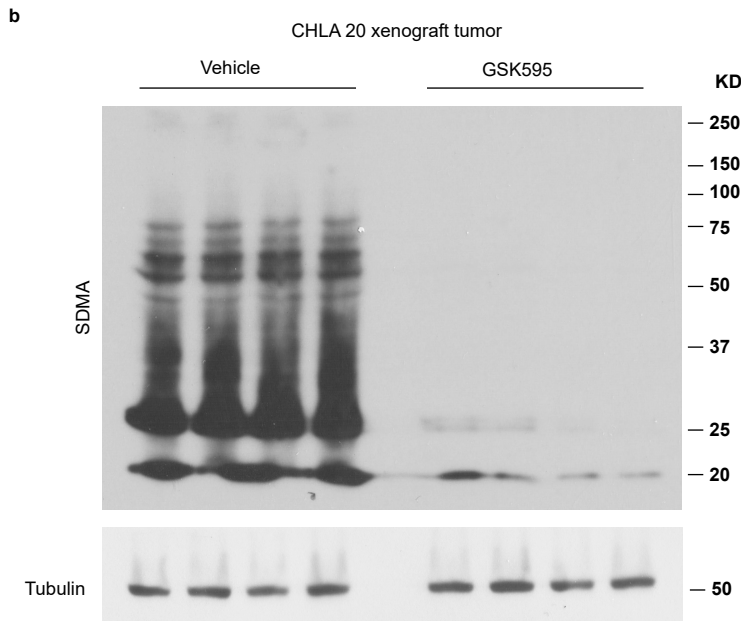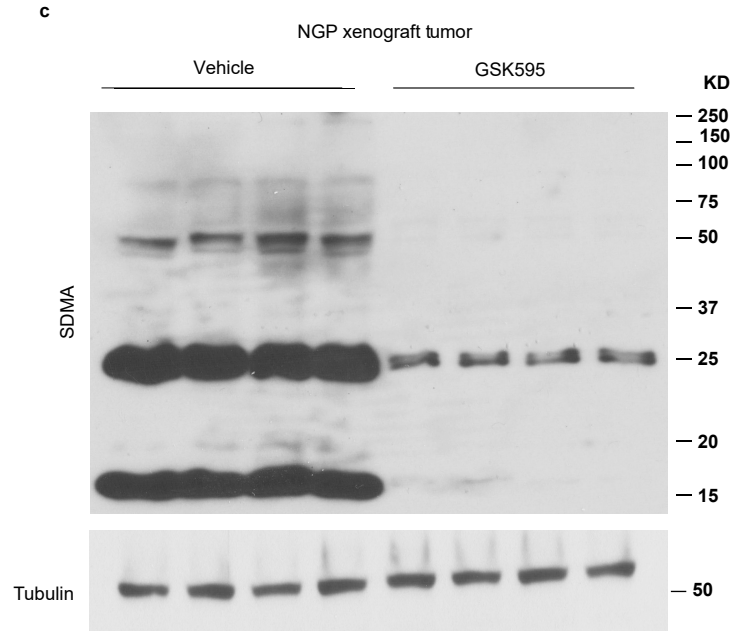

**Fig. S2. GSK595 treatment shows efficacy *in vivo*.** **a**, Weekly bodyweight of mice used in this study (n=7-9, Vehicle=7, GSK595=9). Immunoblots of SDMA in CHLA20 (**b**) (n=4) and NGP (**c**) (n=4) xenograft tumors (equal loading control seen in Fig. 3e). Uncropped immunoblots were provided in Source Data file.





Supplementary Figure 3 continued

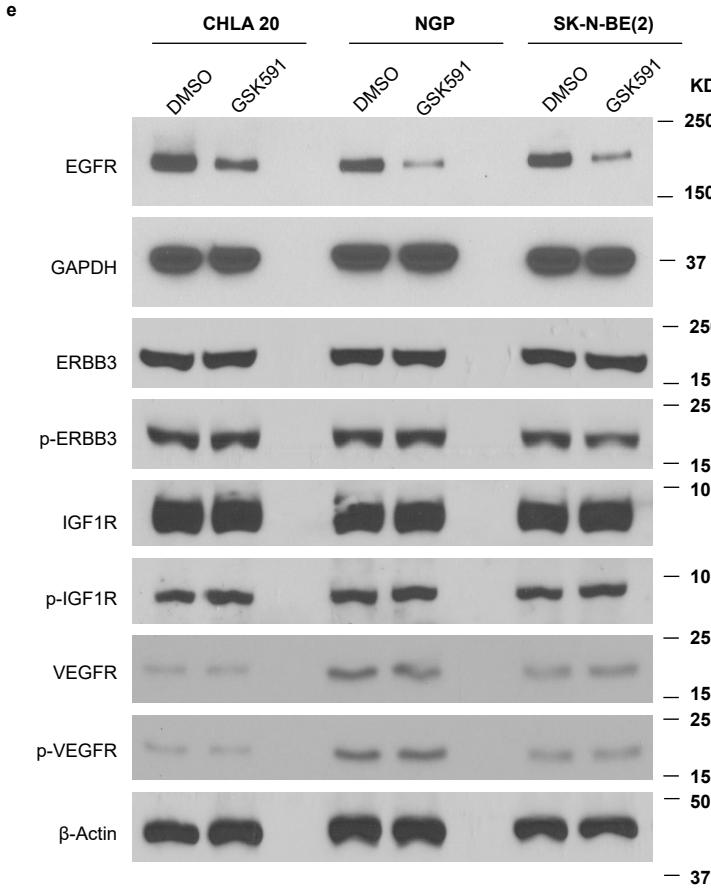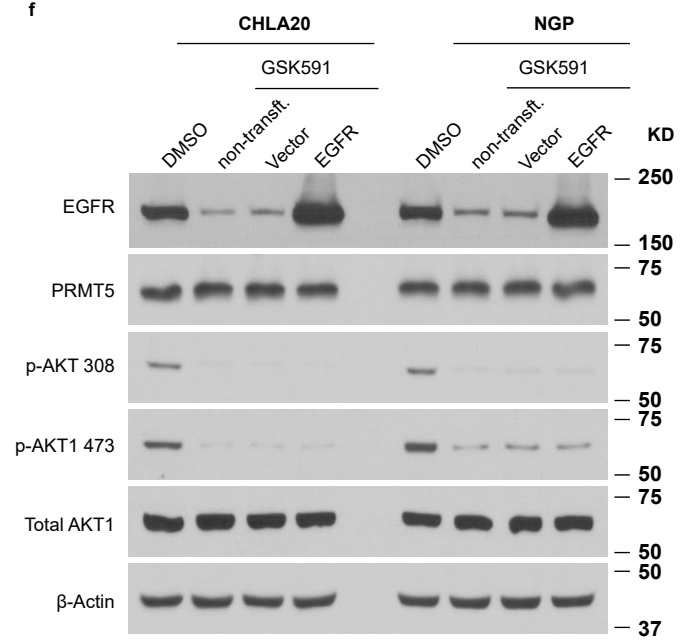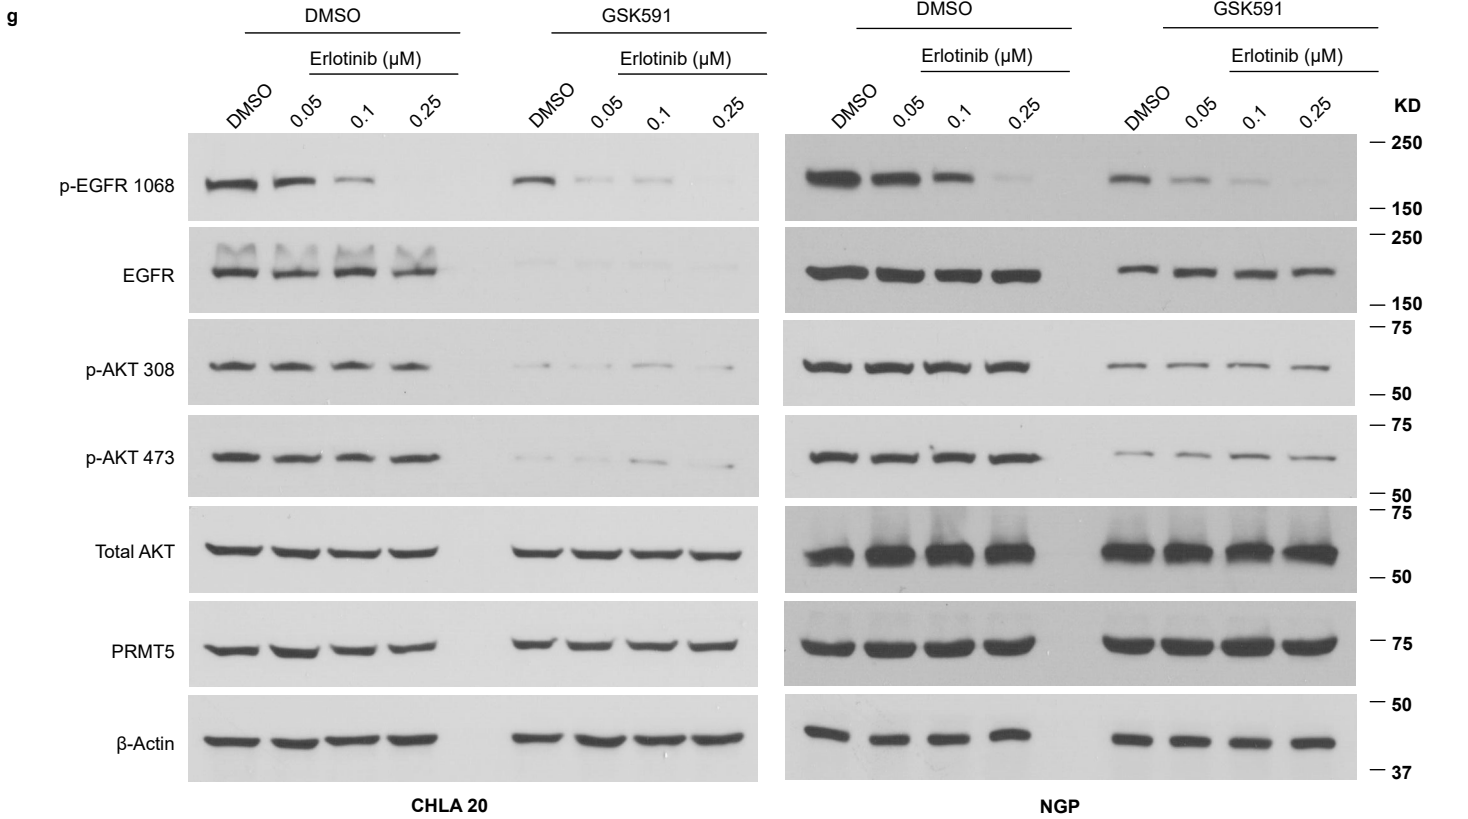

**Fig. S3. Screening the impact of PRMT5 inhibition on known upstream regulators of AKT activation.** **a**, Immunofluorescence showing the levels of PRMT5, phosphorylated AKT, and total AKT in NGP (left) and SK-N-BE(2) (right) cells treated with DMSO or GS591. Scale bars, 100  $\mu\text{m}$ . **b**, The expression or phosphorylation of indicated kinases or phosphatases involved in the regulation of AKT activation in neuroblastoma cells under GSK591 treatment. **c**, Immunofluorescence showing the expression of DNA-PKs in CHLA20 and NGP cells treated with DMSO or GS591. Scale bars, 100  $\mu\text{m}$ . **d**, Western blots of PDK1, phospho-PDK1, Rictor and PTEN in CHLA20 and NGP cells treated with DMSO or GSK591 with or without EGF stimulation. **e**, Immunoblots showing the protein levels or phosphorylation of RTKs not affected by GSK591 treatment. **f**, Immunoblots showing the levels of, EGFR, p-AKT Thr308, p-AKT Ser473, and PRMT5 in cells treated with DMSO or GSK591 followed by indicated doses of Erlotinib. **g**, The expression of EGFR, PRMT5, and phosphorylation of AKT1 examined by Western blot in cells either non-transfected or transfected with vector and EGFR, respectively. **a**, **c**, **d**, **f**, and **g**, representative results from three independent experiments. **b** and **e**, representative results from two independent experiments. Uncropped immunoblots were provided in Source Data file.

Supplementary Figure 4

a

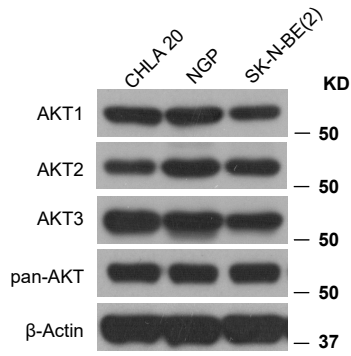

b

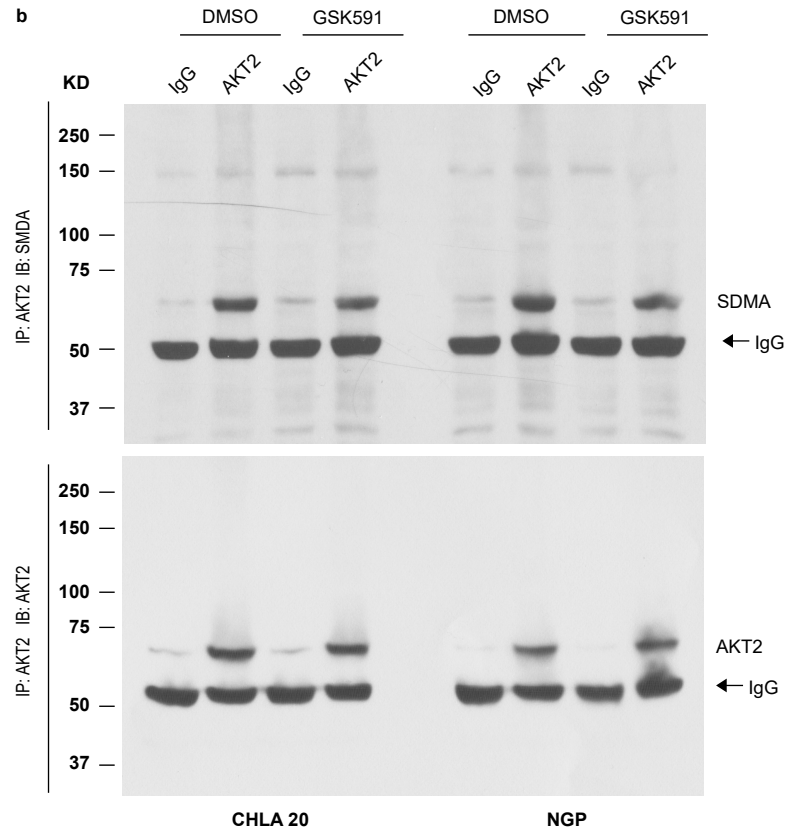

c

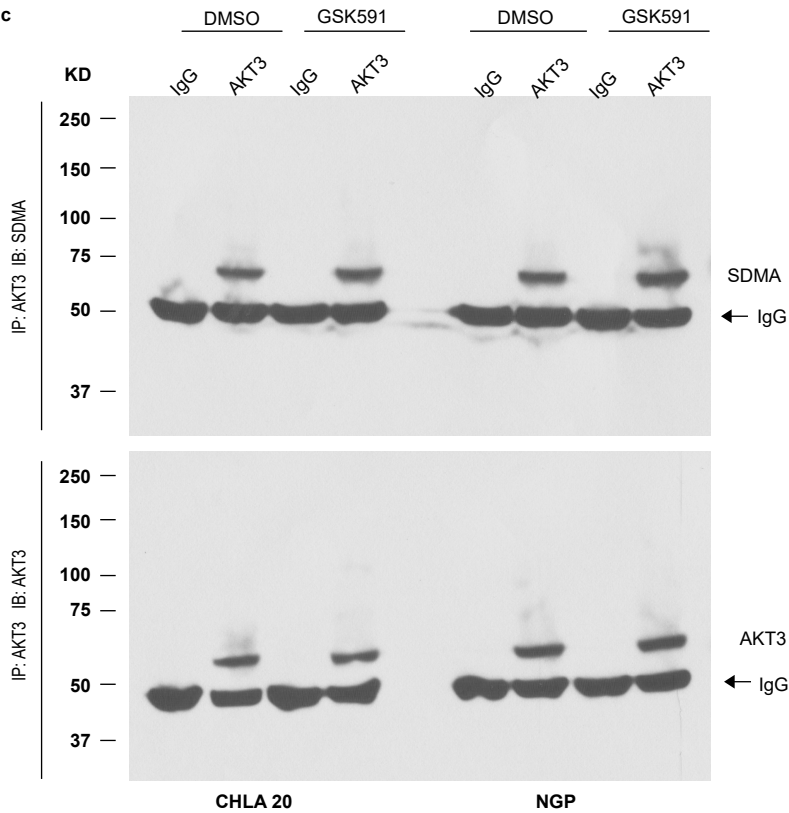

d

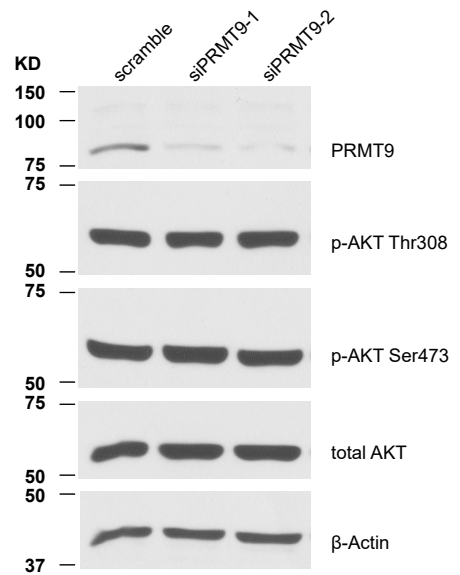

**Fig. S4. GSK591 treatment does not affect SDMA on AKT2/3.** **a**, The expression of AKT isoforms in neuroblastoma cell lines. **b**, Analyzing AKT2 SDMA in CHLA20 and NGP cells treated with DMSO or GSK591. **c**, Western blots of SDMA on AKT3 in CHLA20 and NGP cells treated with DMSO or GSK591. **d**, Western blots showing levels of phosphorylated AKT in control or PRMT9 knockdown cells. **a-c**, representative results from three independent experiments. **d**, representative results from two independent experiments. Uncropped immunoblots were provided in Source Data file.



**Fig. S5. PRMT5 depletion reduces tumor metastasis in the kidney.** **a**, Bioluminescent (upper) and fluorescent imaging (lower) of kidneys harvested from mice described in Fig. 7a. **b**, FACS analysis of iRFP720+ human neuroblastoma cells in the kidneys (n=6). **c**, Bioluminescent (upper) and fluorescent imaging (lower) of femurs harvested from mice described in Fig. 7a. **d**, FACS analysis of iRFP720+ human neuroblastoma cells in the bone marrow isolated from the femur (n=6). **e**, Western blot showing the expression of HA-AKT1 wild type, R15K, and R391K in the absence and presence of MG132. The Western blotting results shown here were representative of two independent experiments. Uncropped immunoblots were provided in Source Data file. Uncropped immunoblots were provided in Source Data file. *p* values are calculated by two-tailed unpaired Student's *t* test using Microsoft Excel. Error bars represent SD, n.s, not significant.

## Supplementary Figure 6. Uncropped Western blots

Fig. 1f

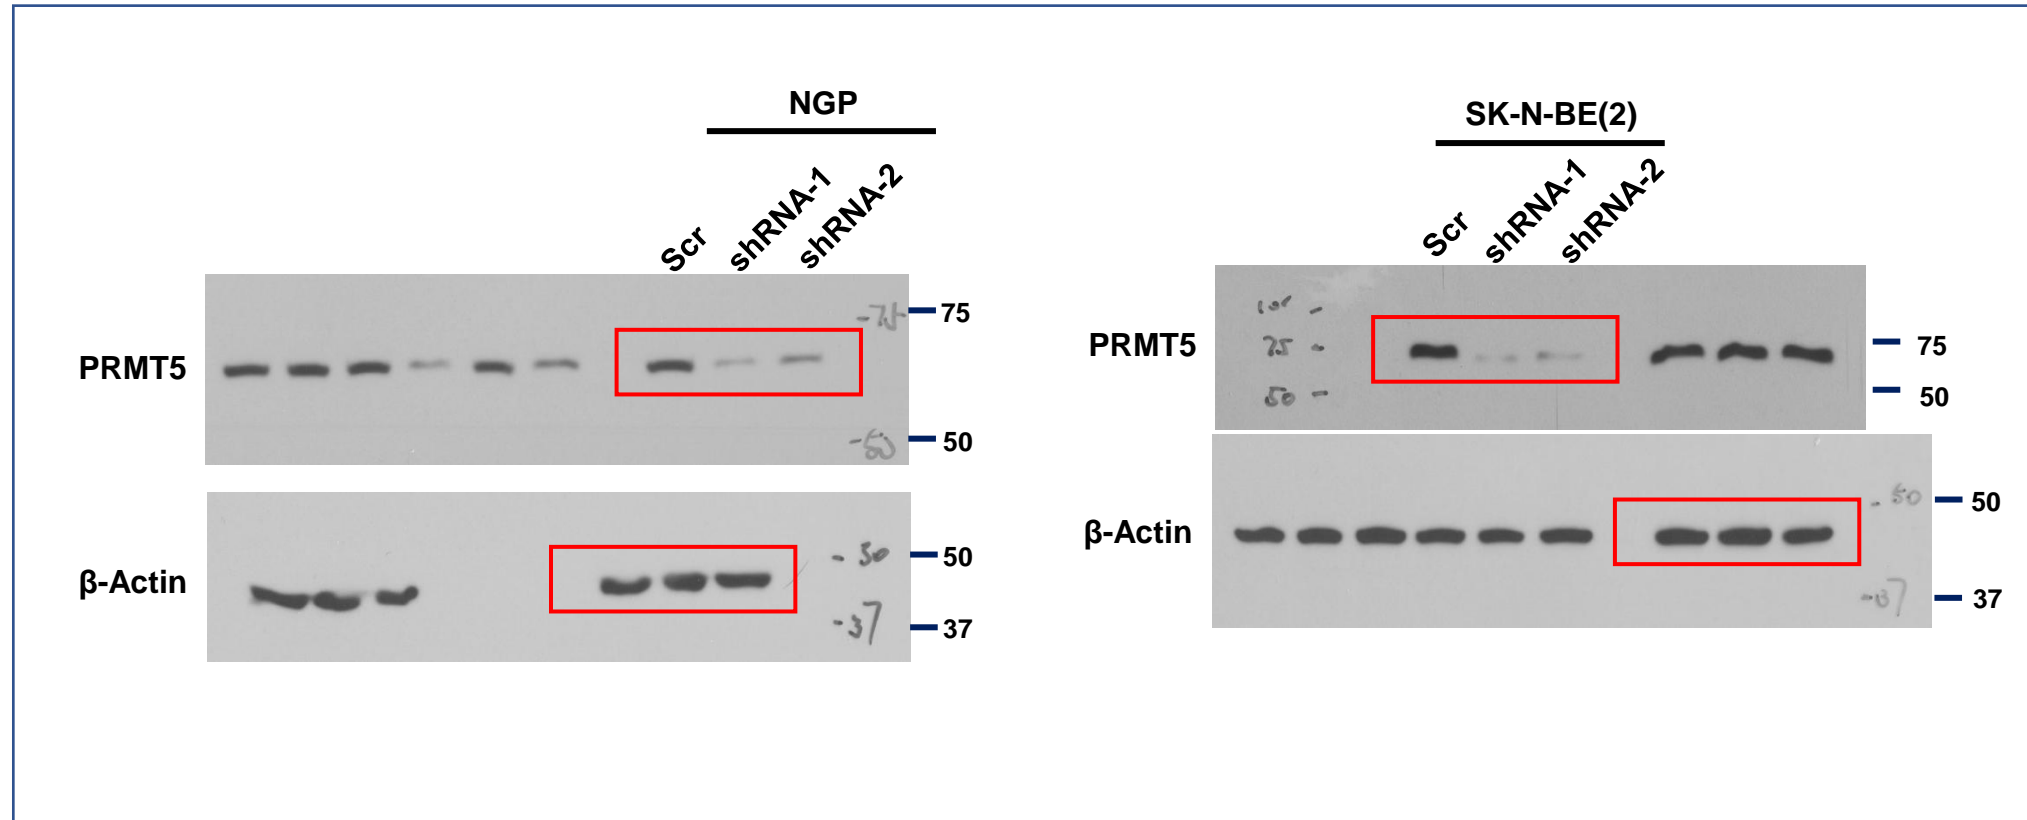

Fig. 1g

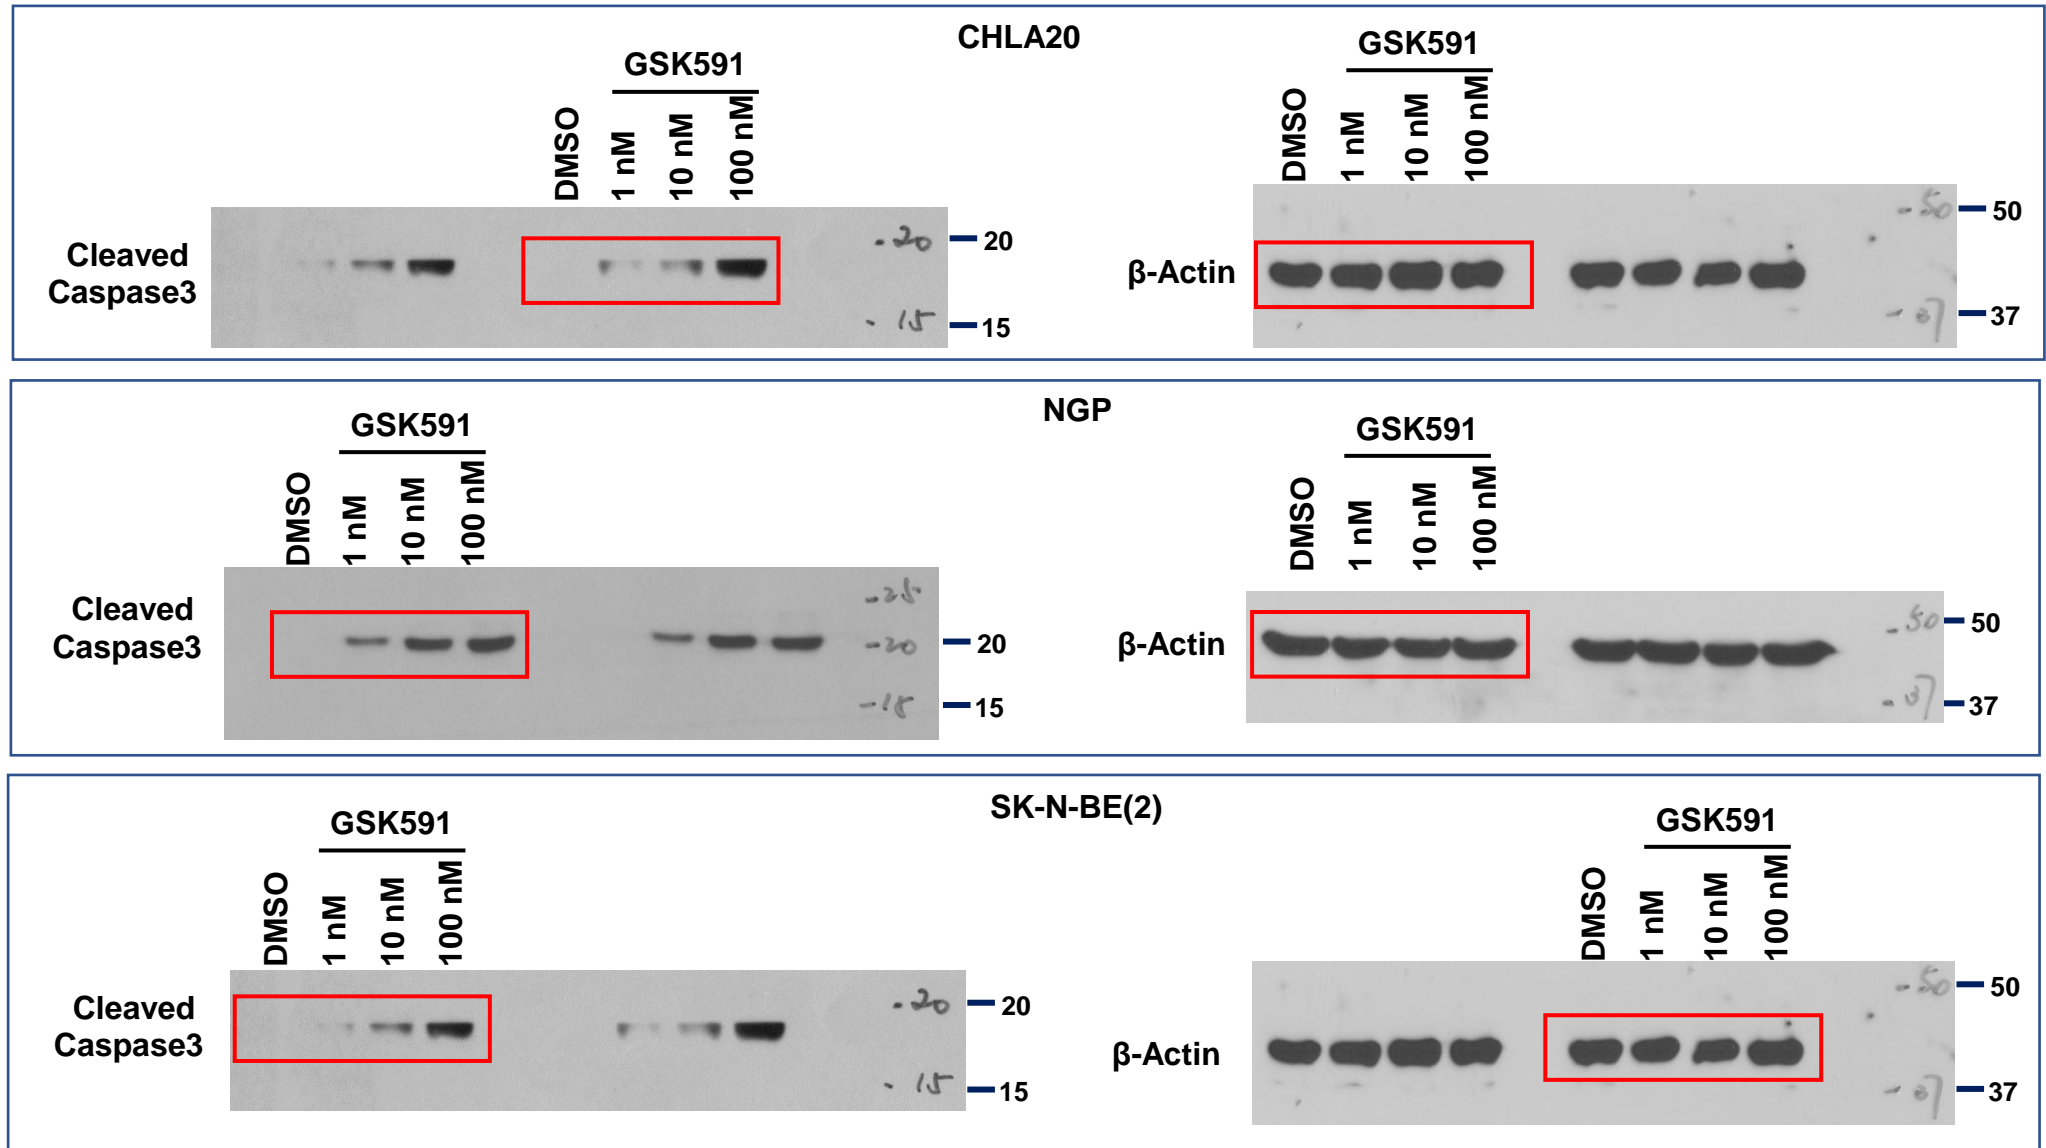



Fig. 3b

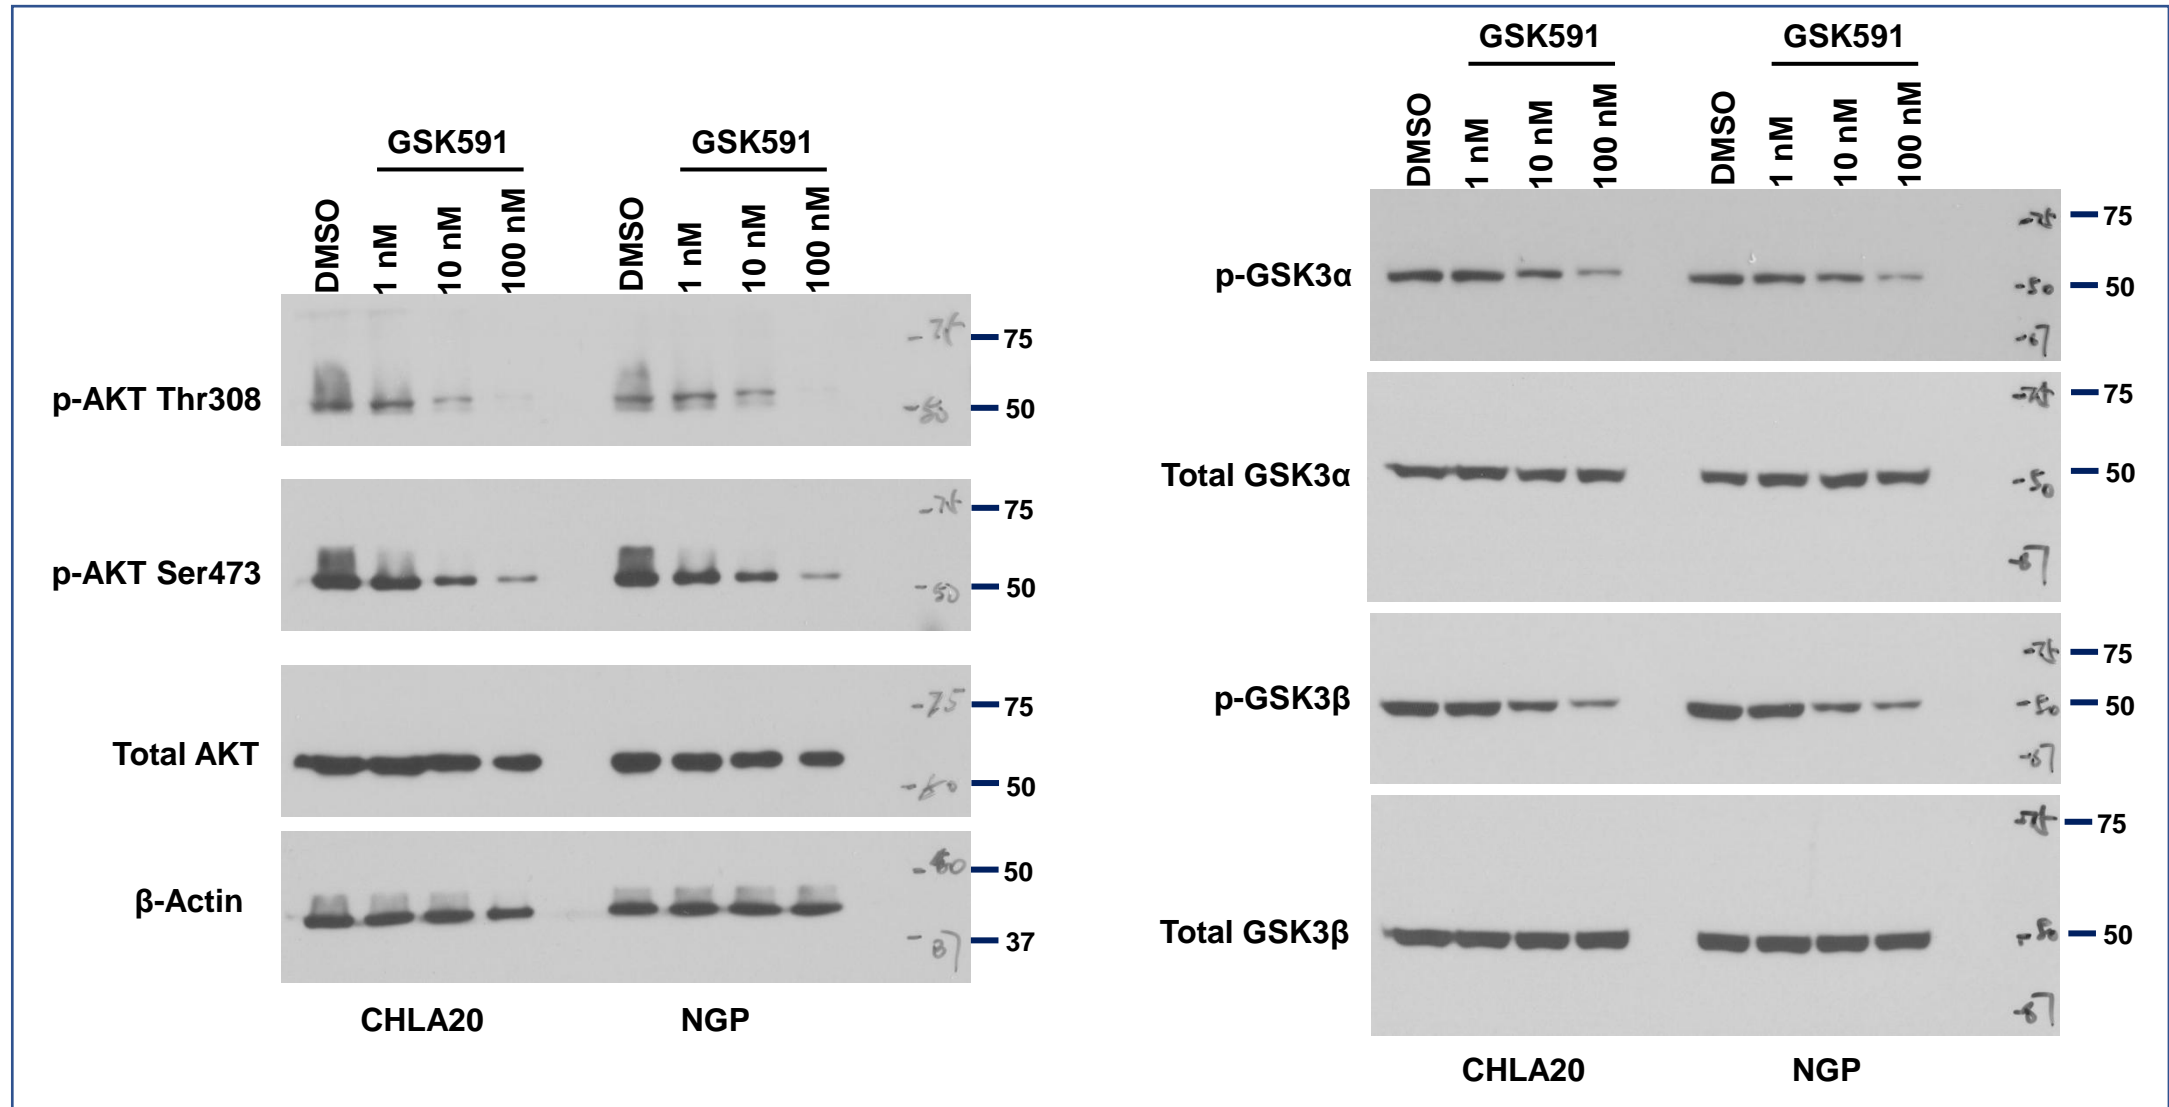

Fig. 3c left panel

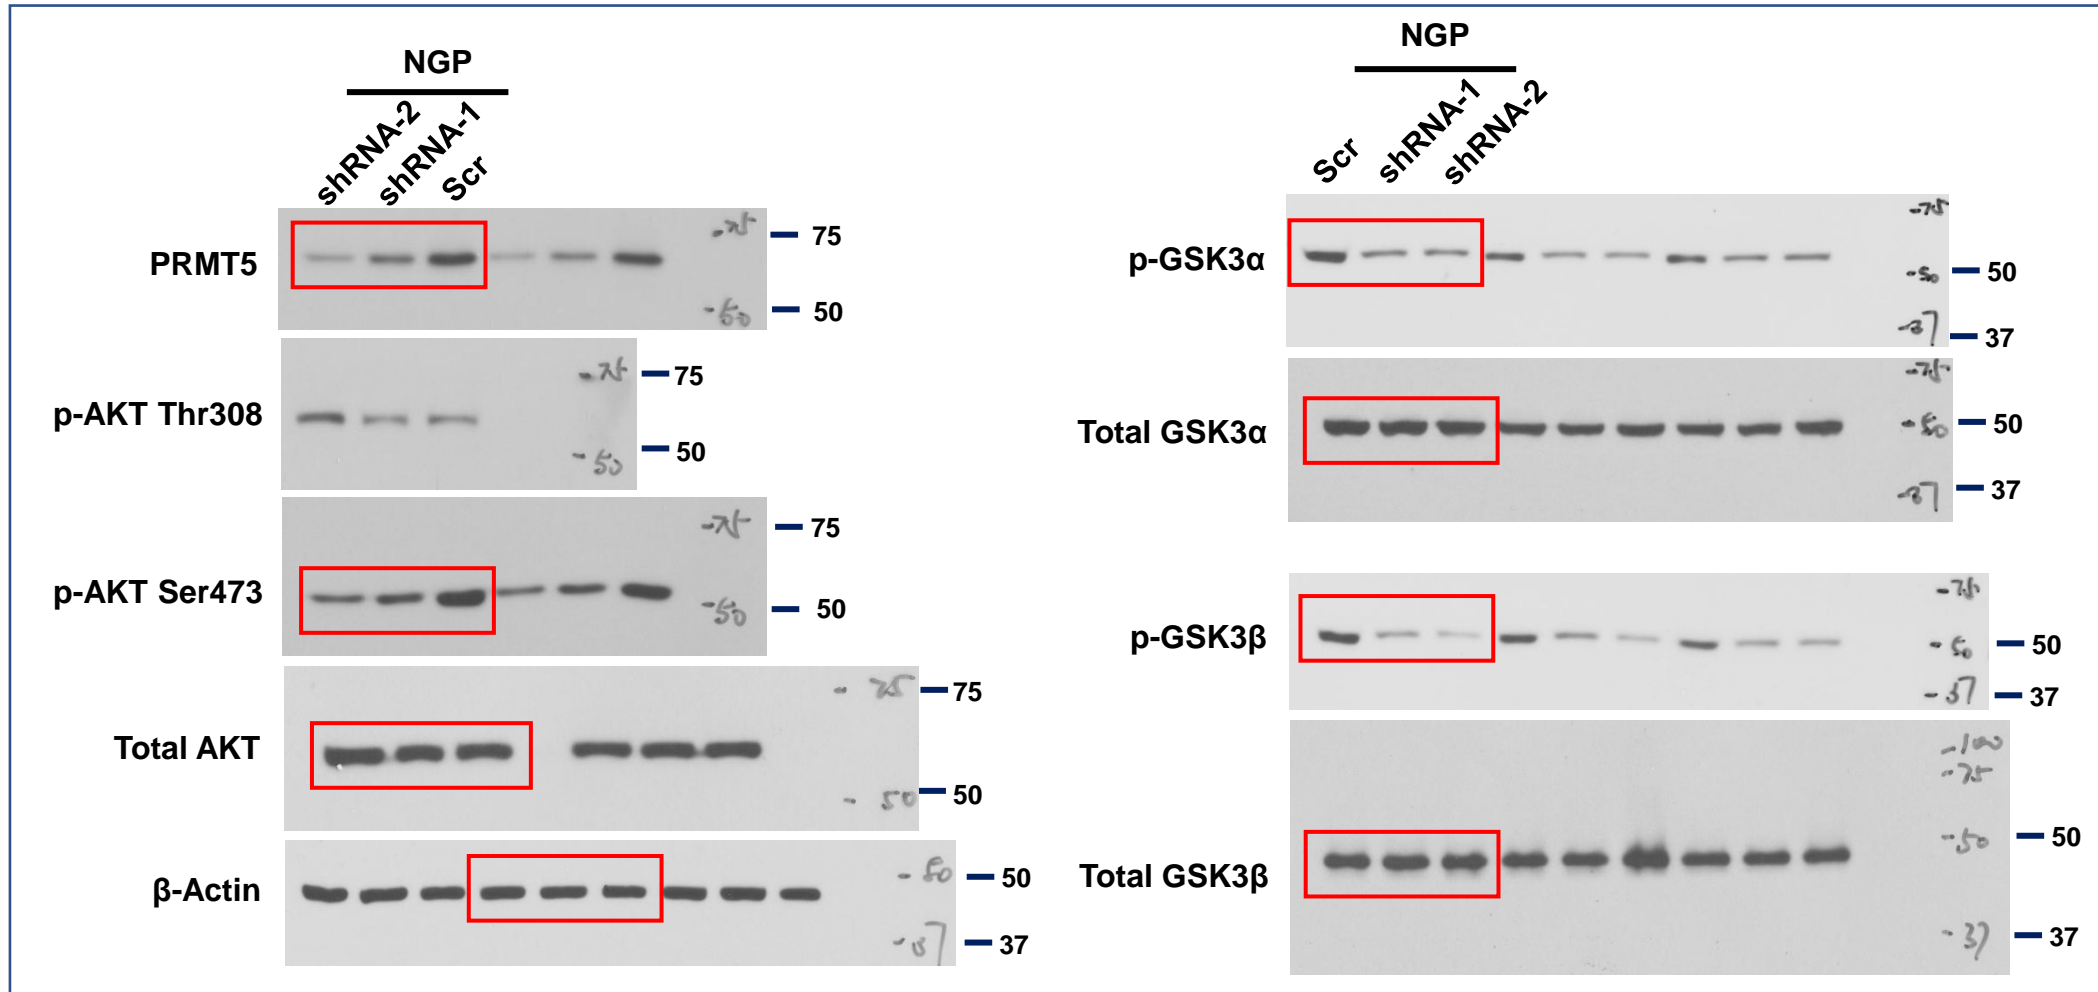

Fig. 3c right panel

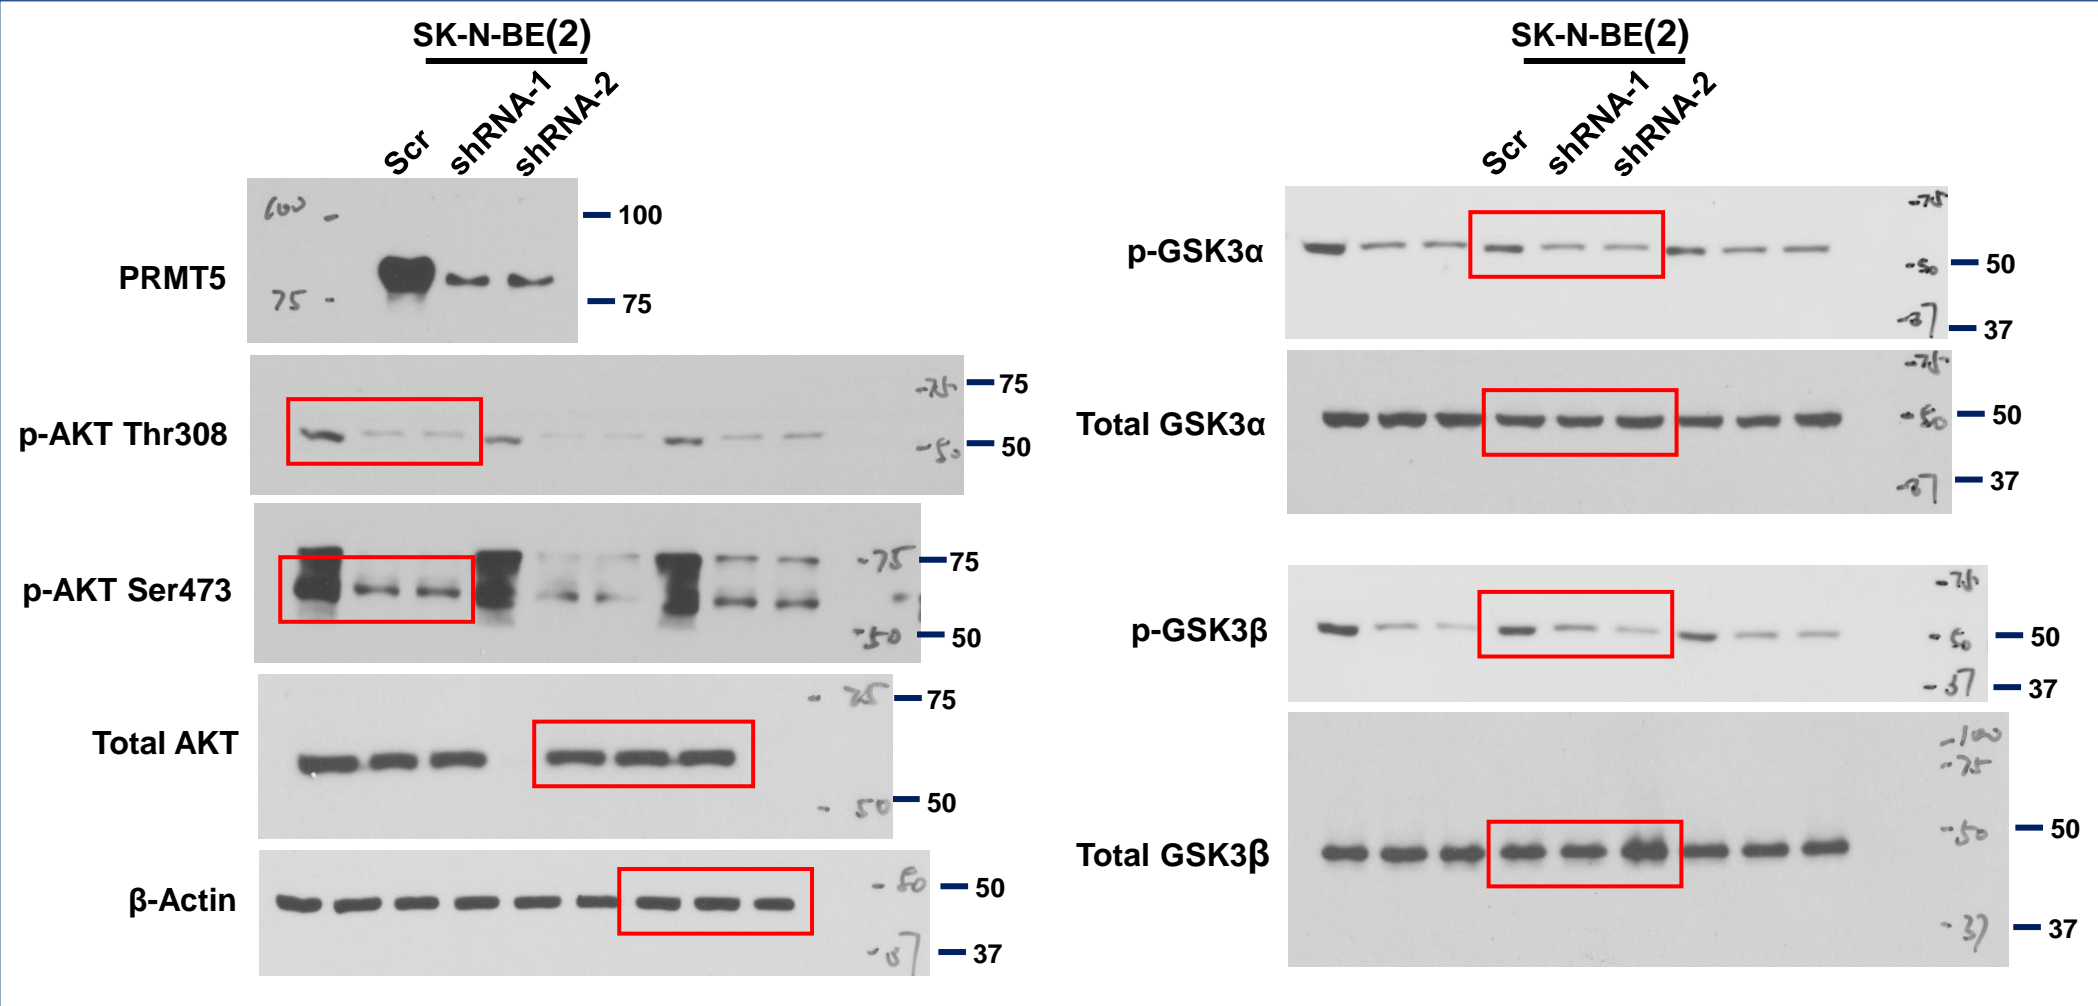

**Fig. 3d**

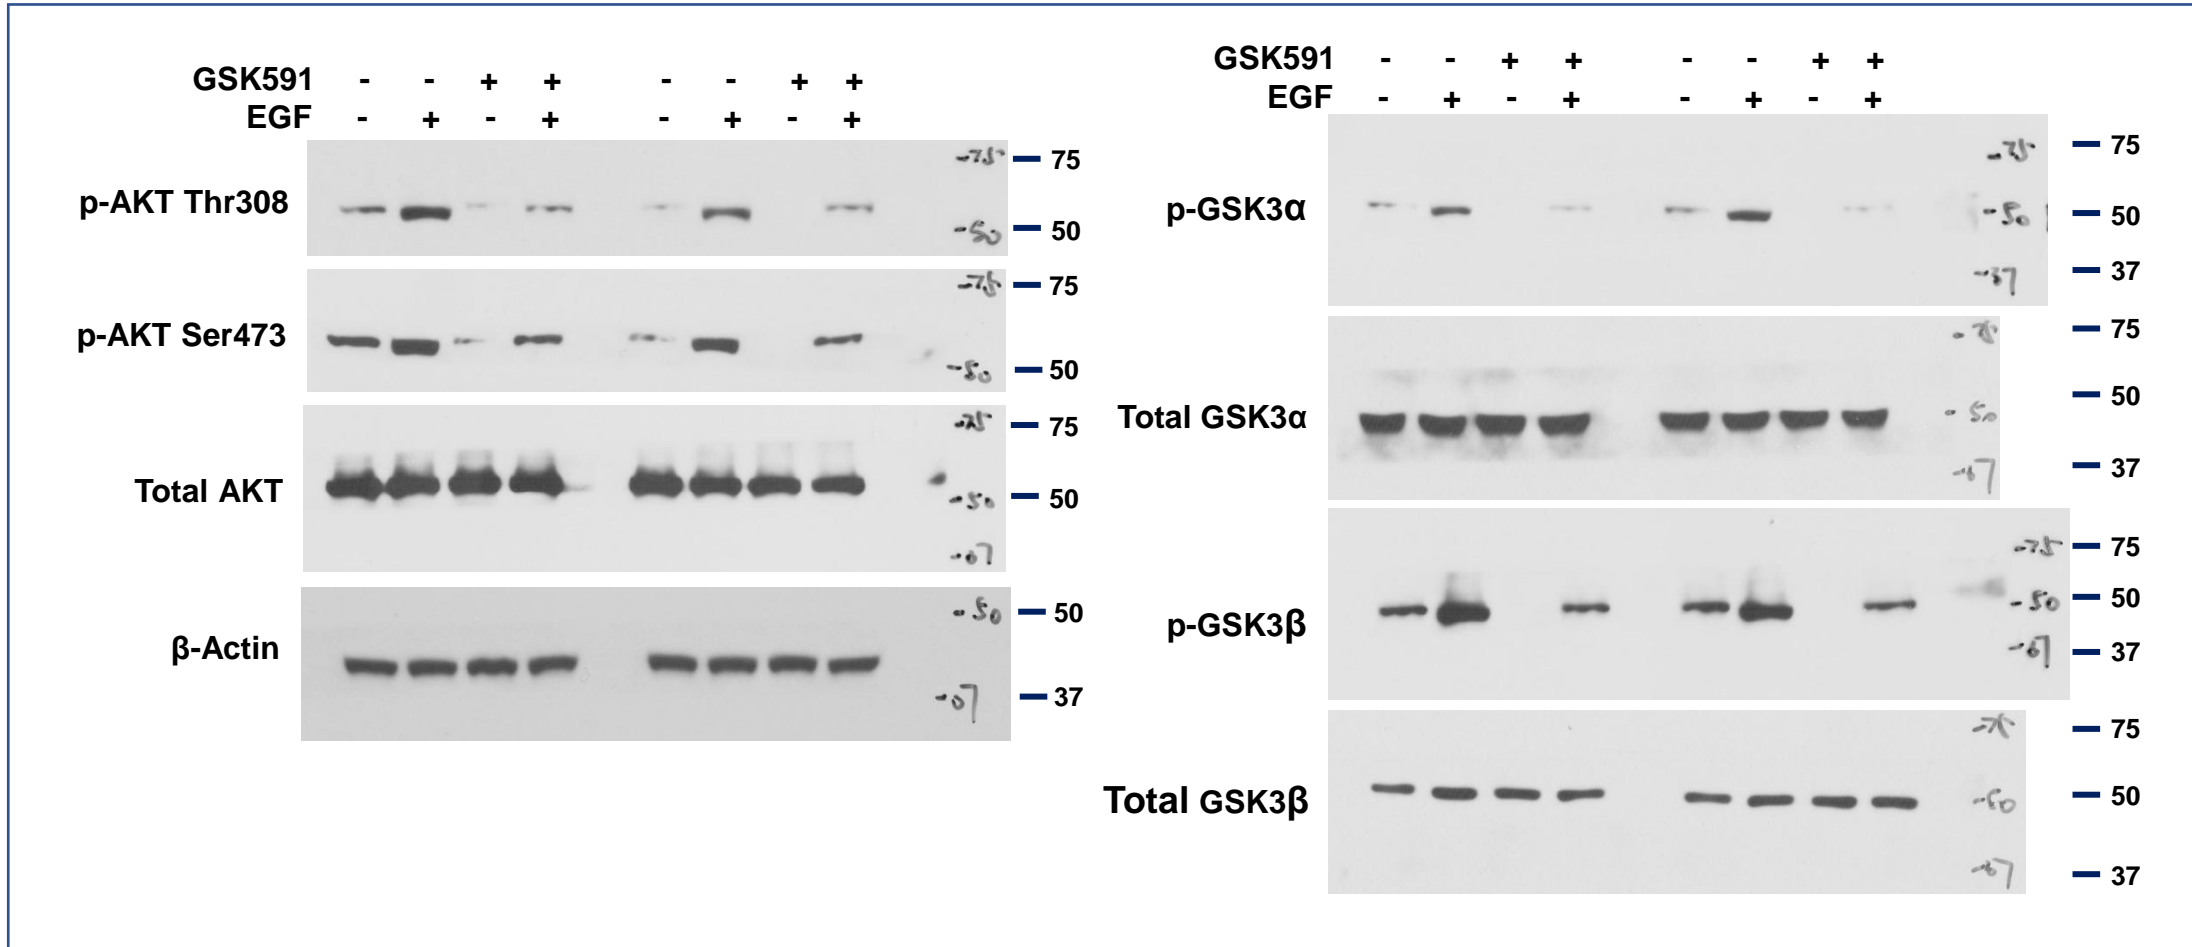

**Fig. 3e left panel**

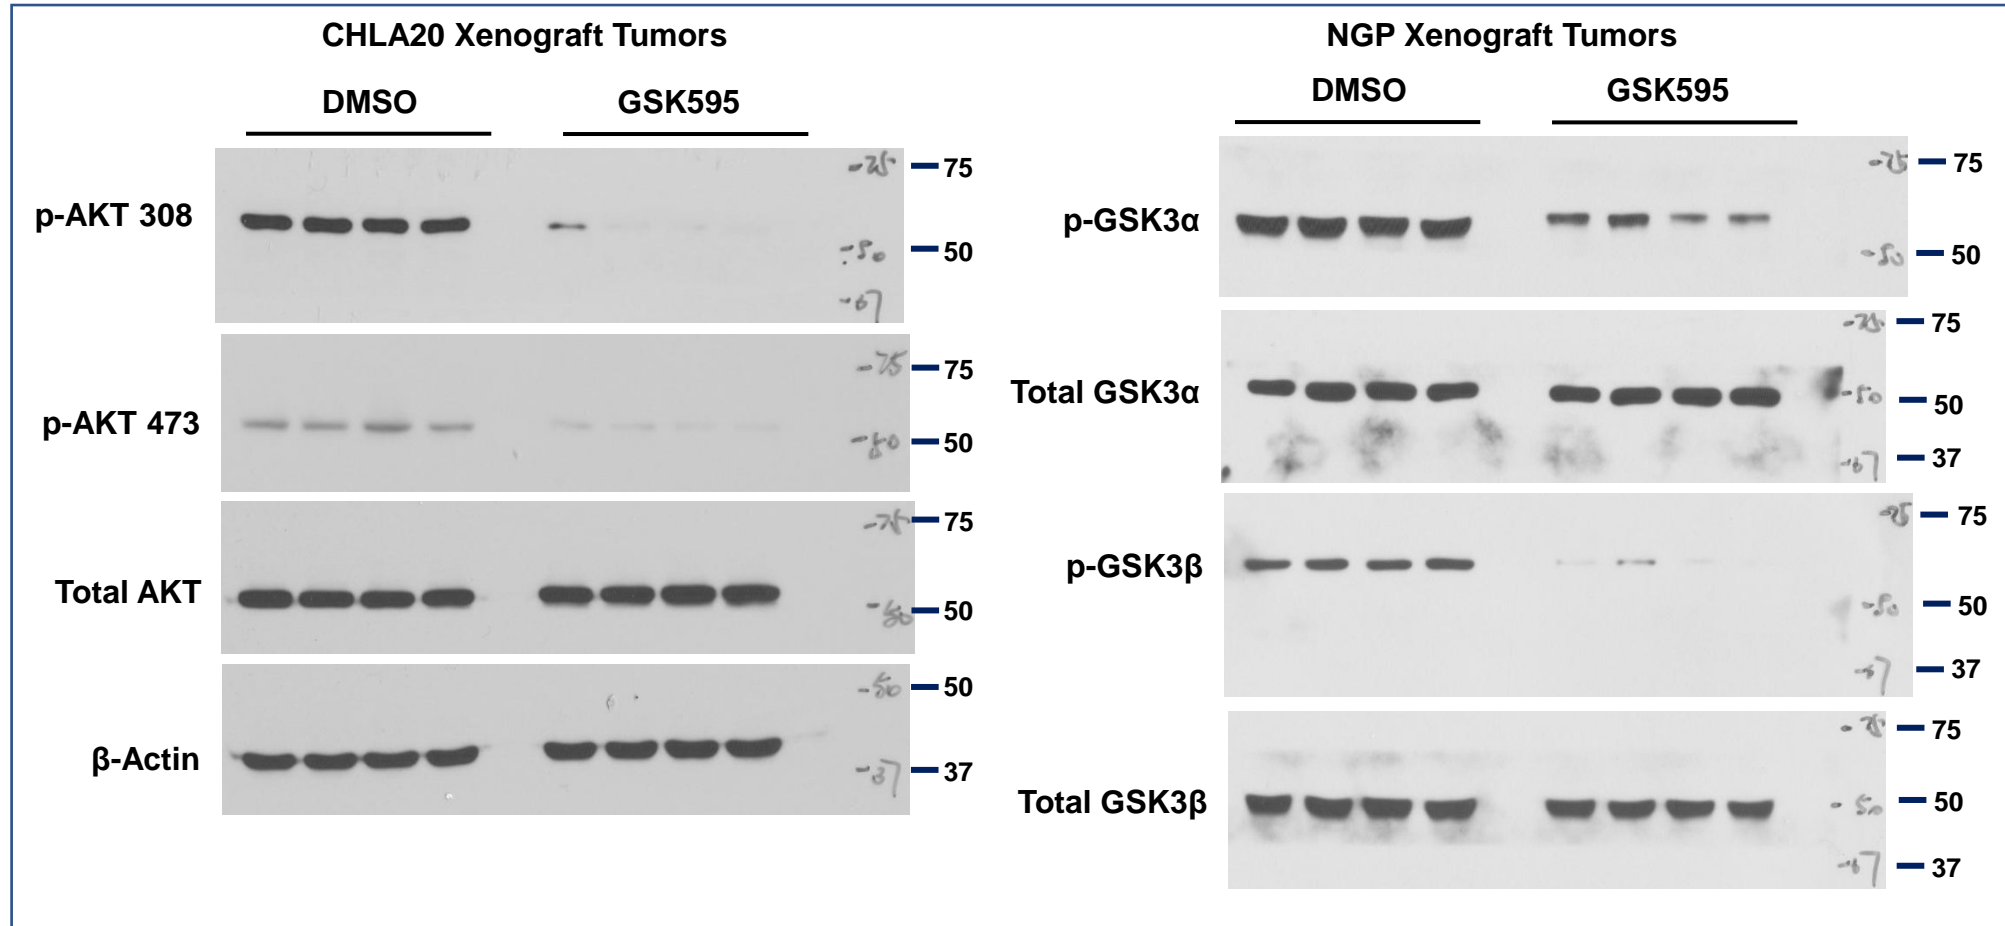

Fig. 3e right panel

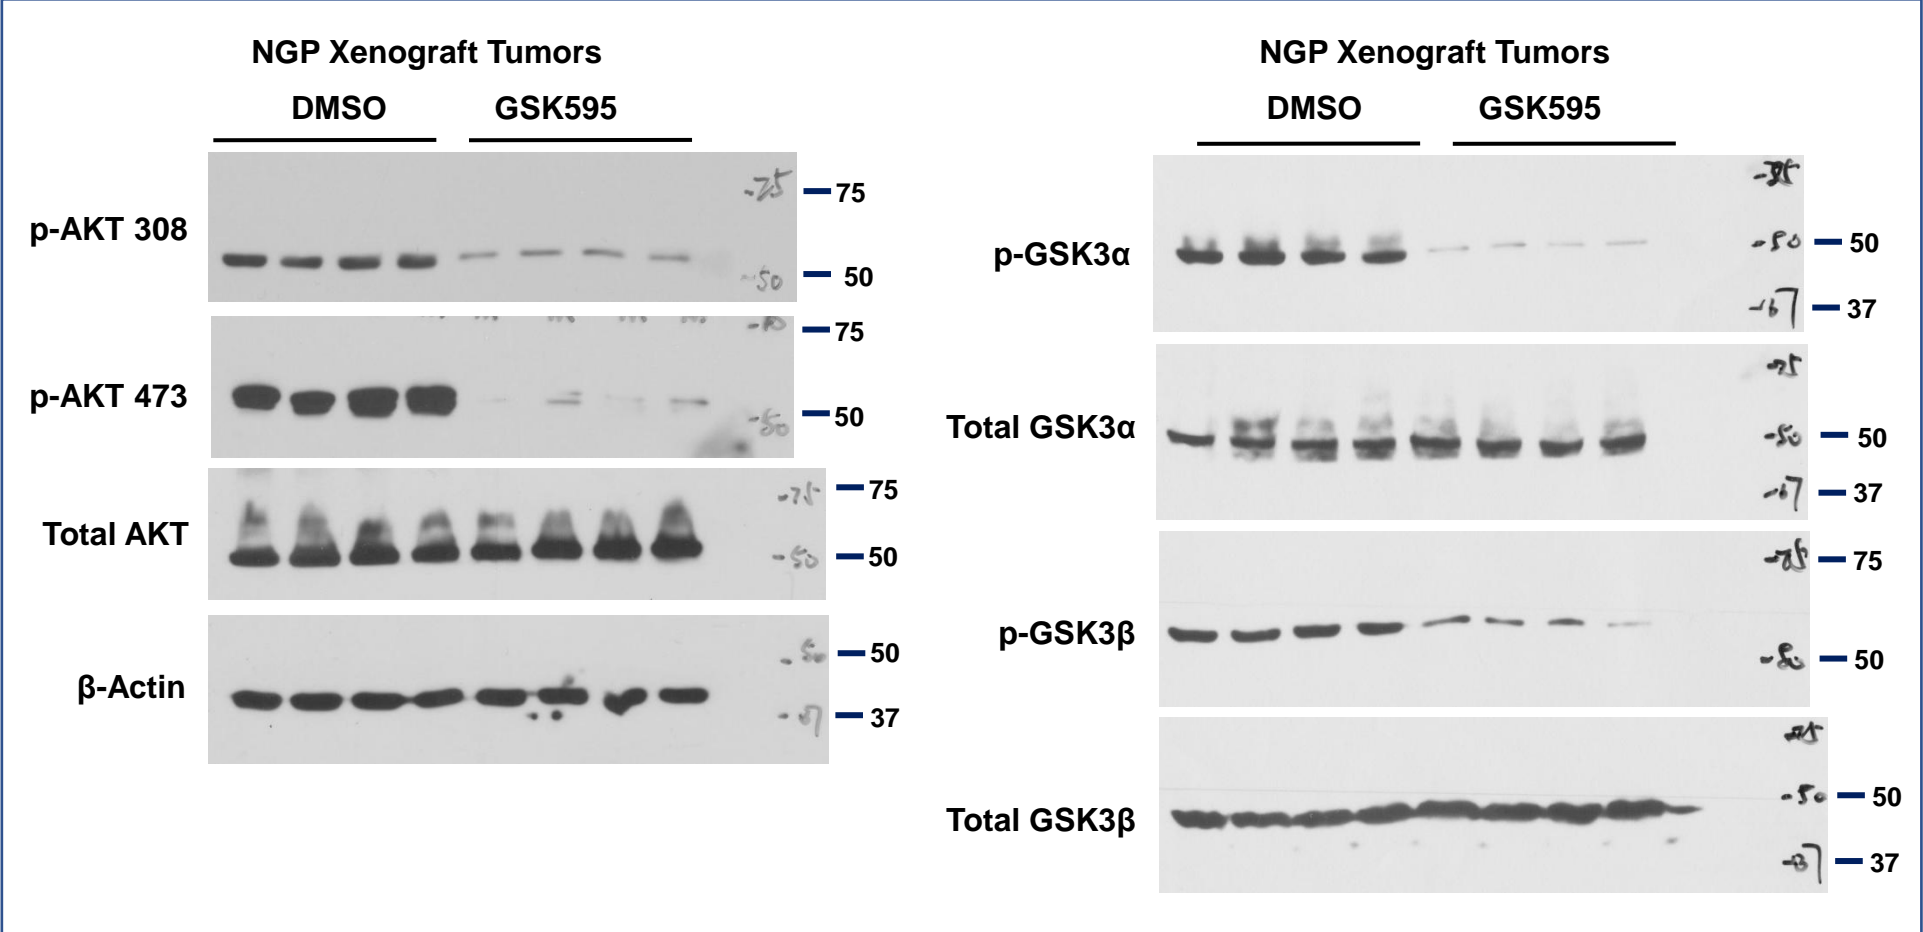

Fig. 4a

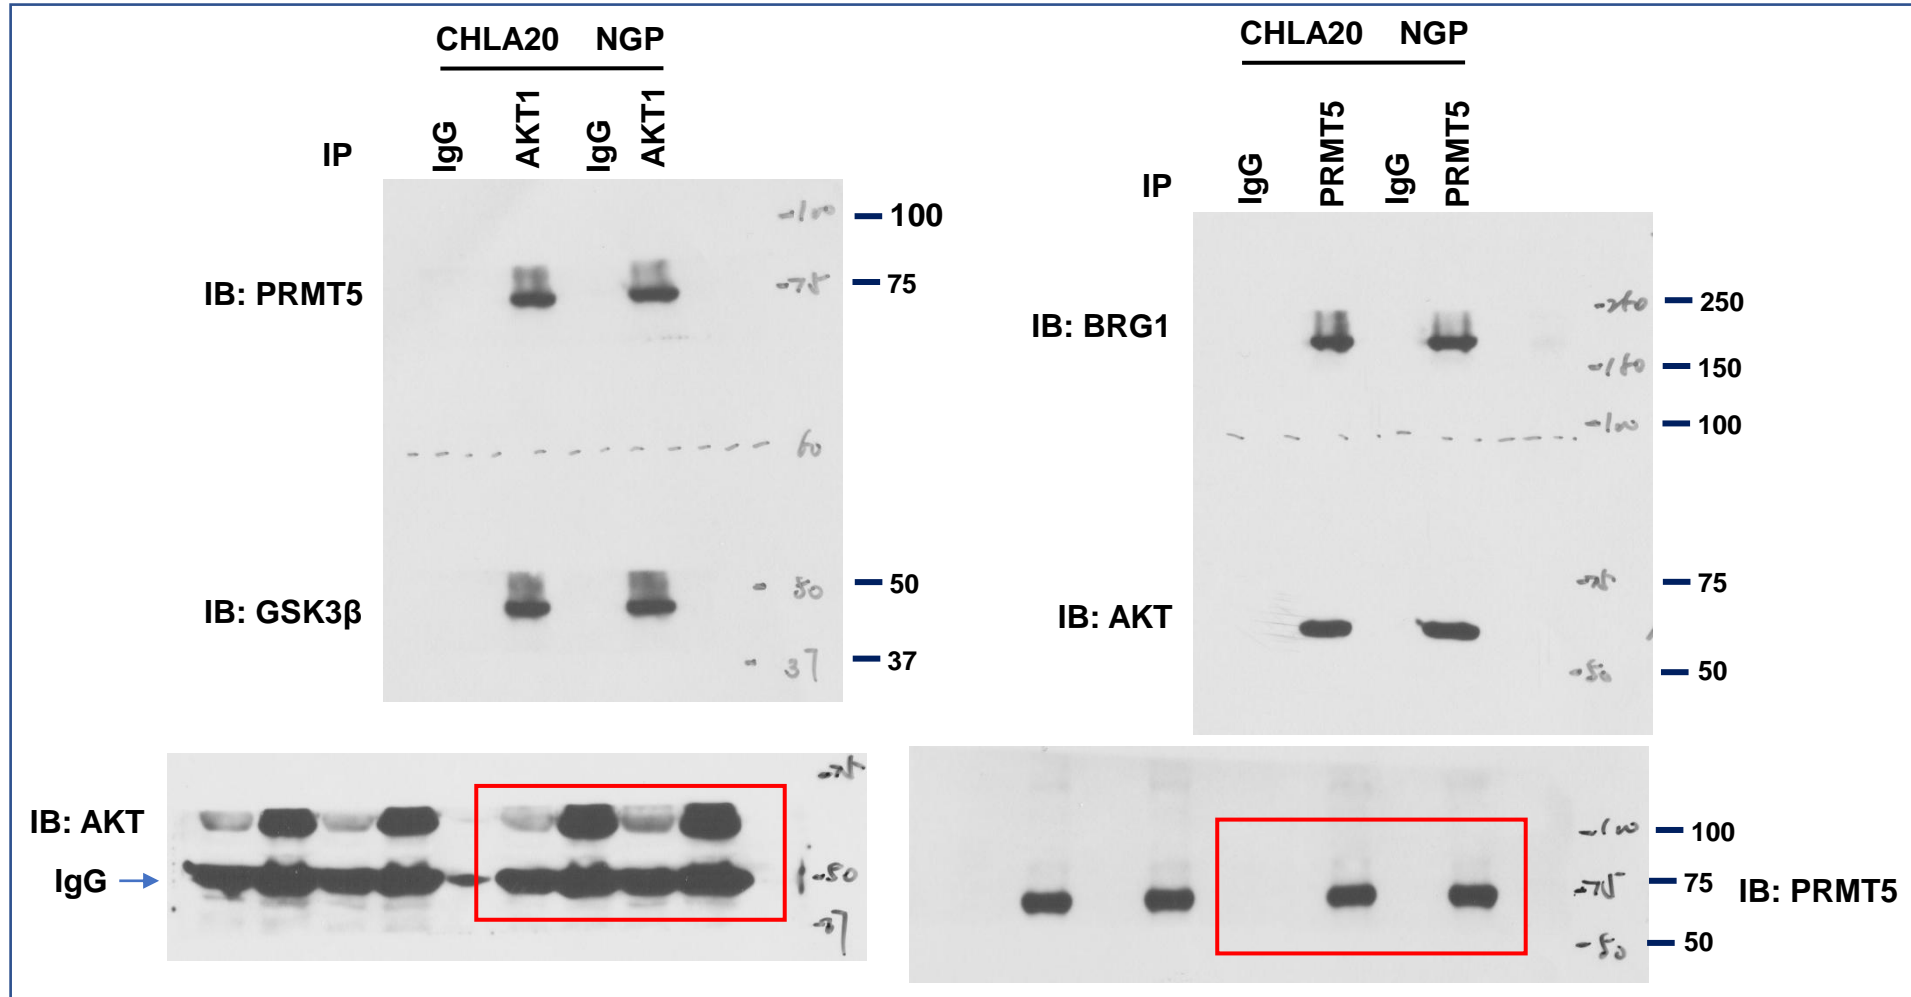

Fig. 4a continued

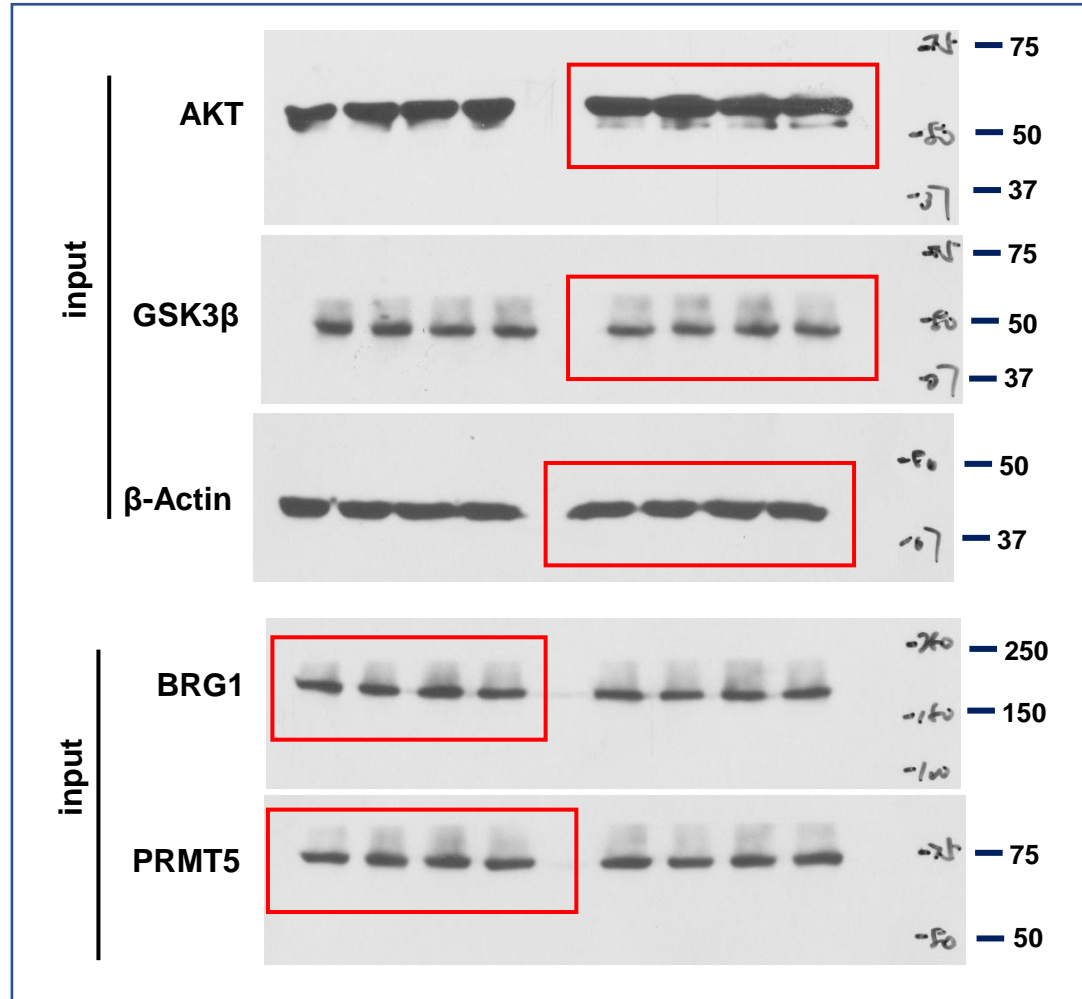



Fig. 4b

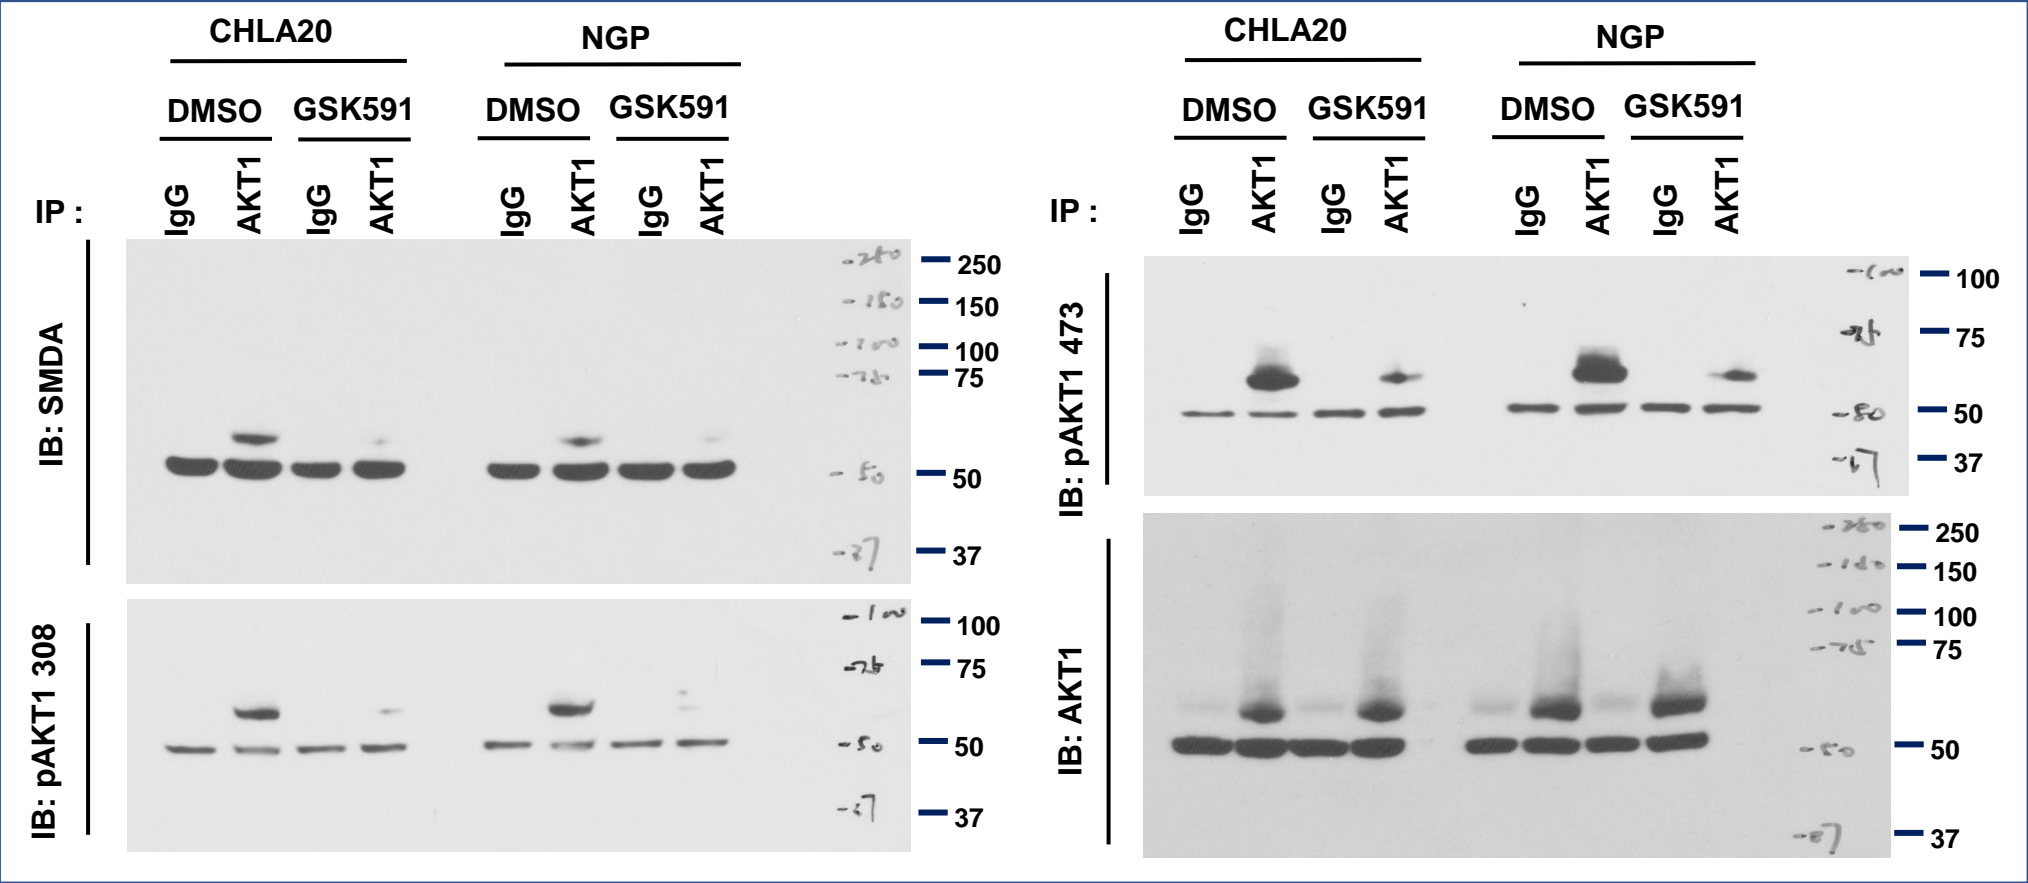



**Fig. 4e**

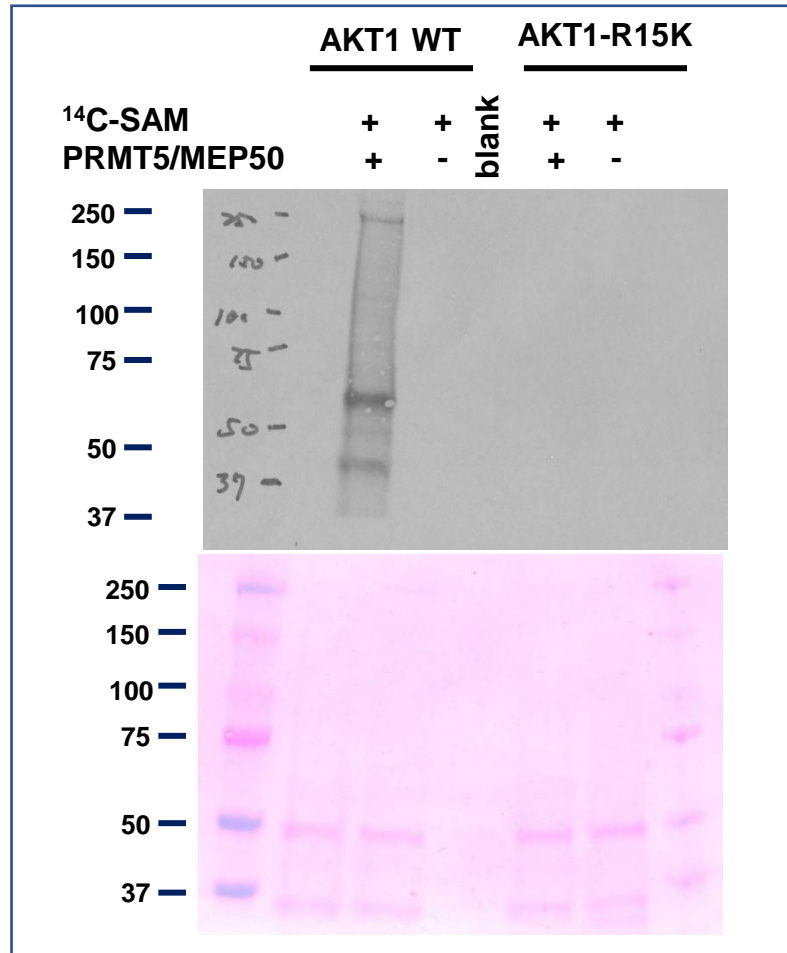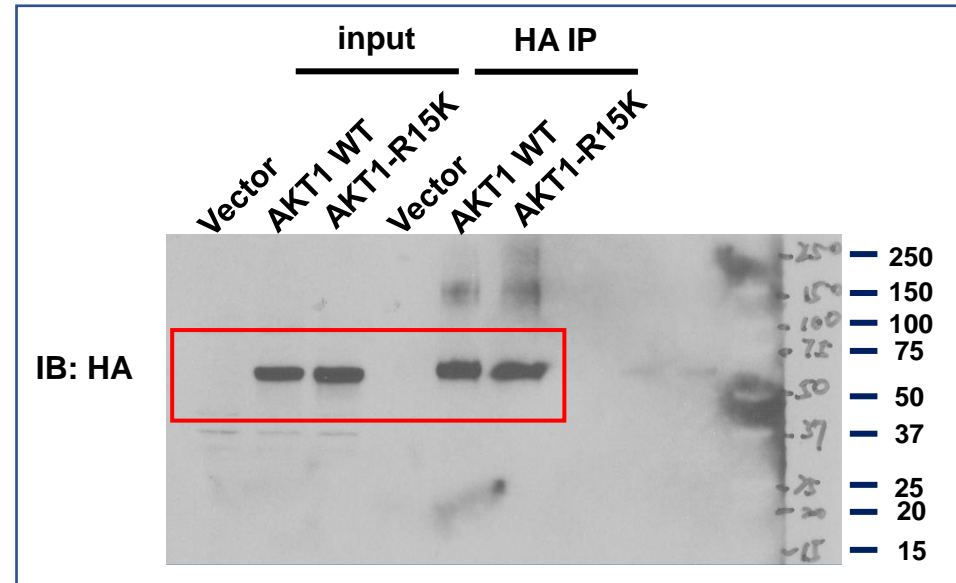

**Fig. 4f**

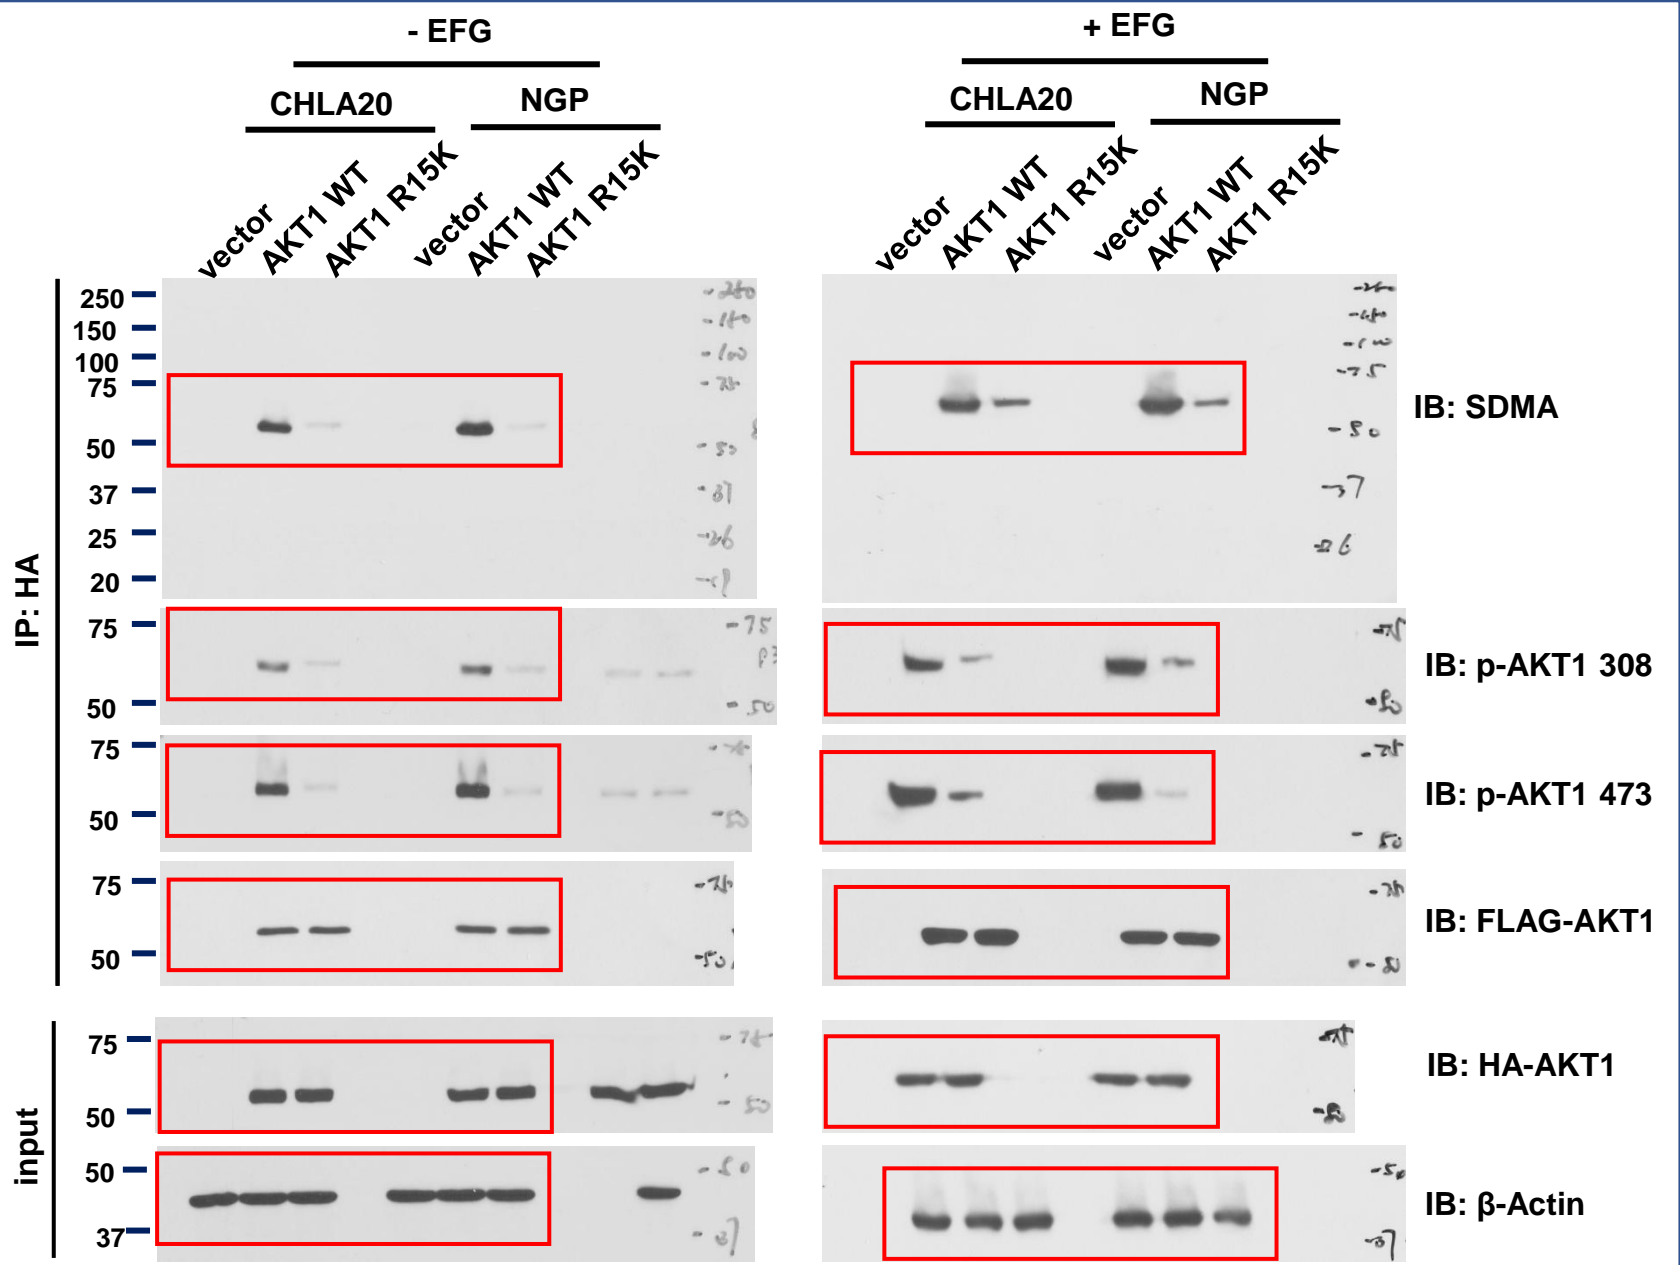

**Fig. 5a**

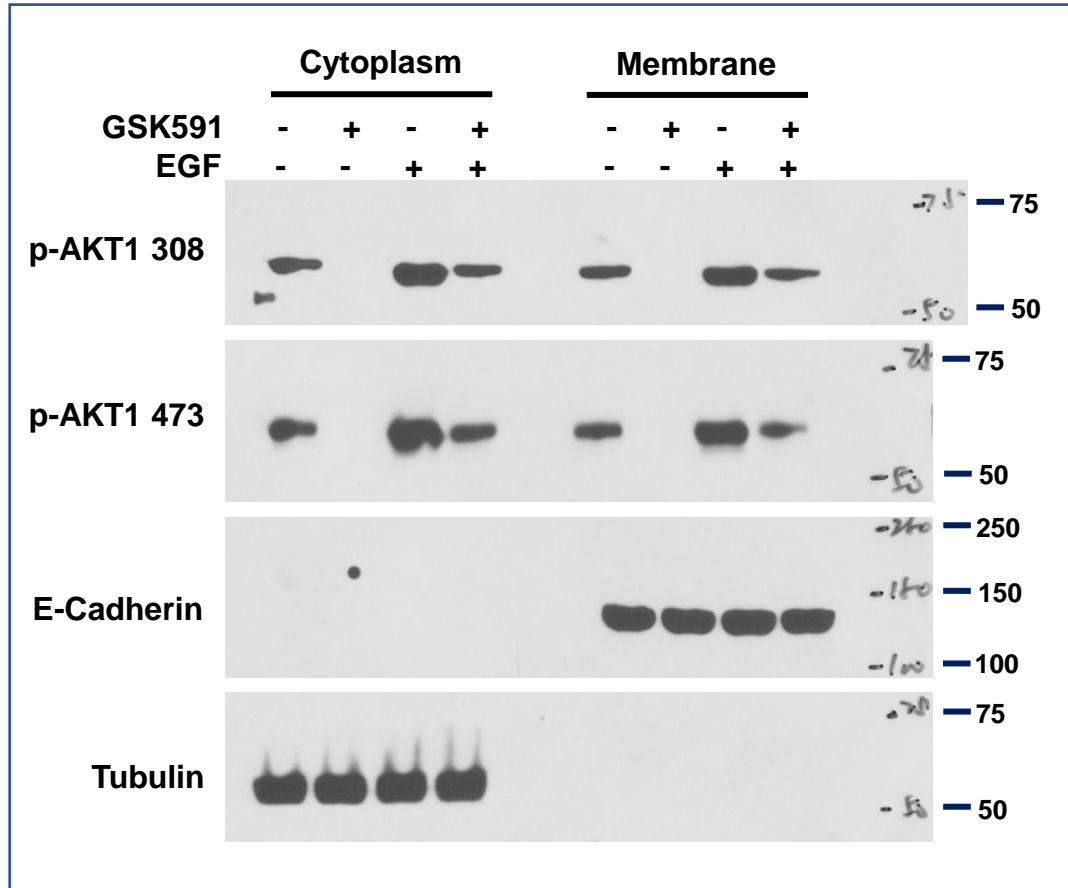

**Fig. 5b**

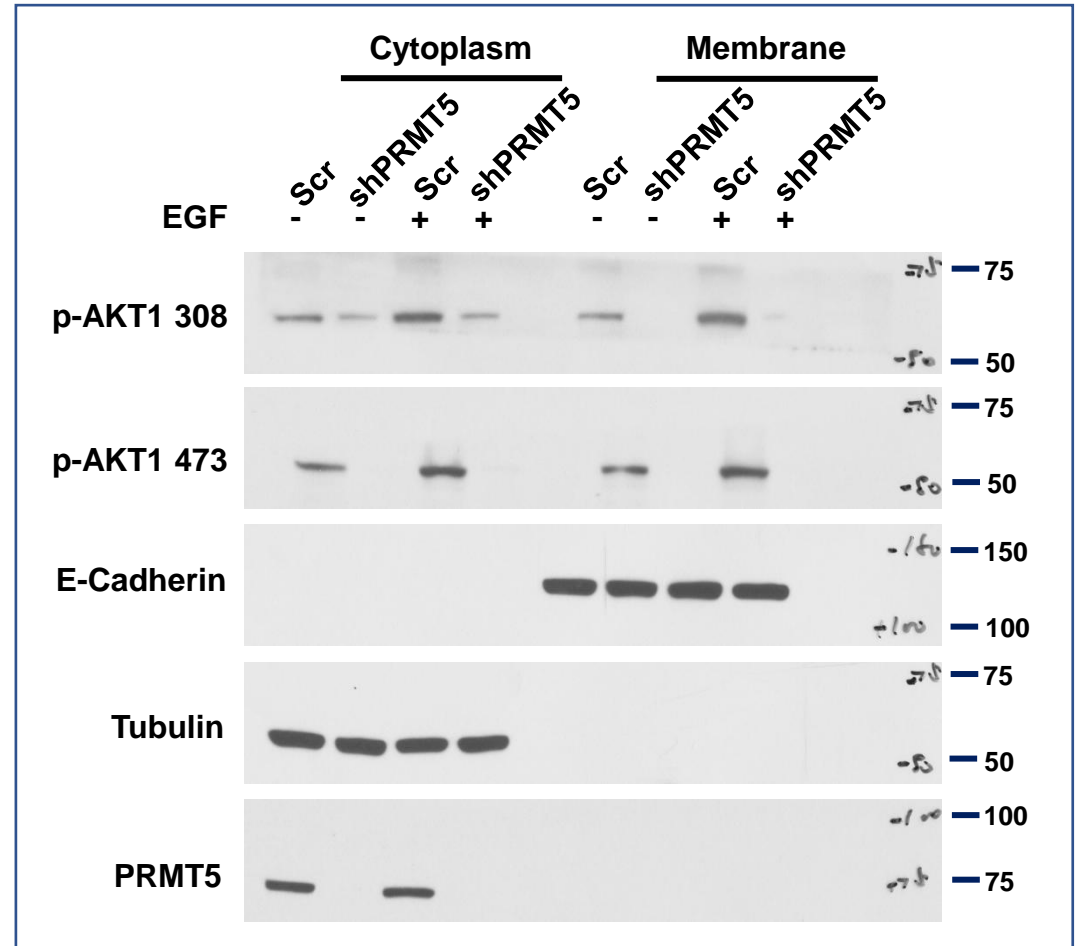

Fig. 5d

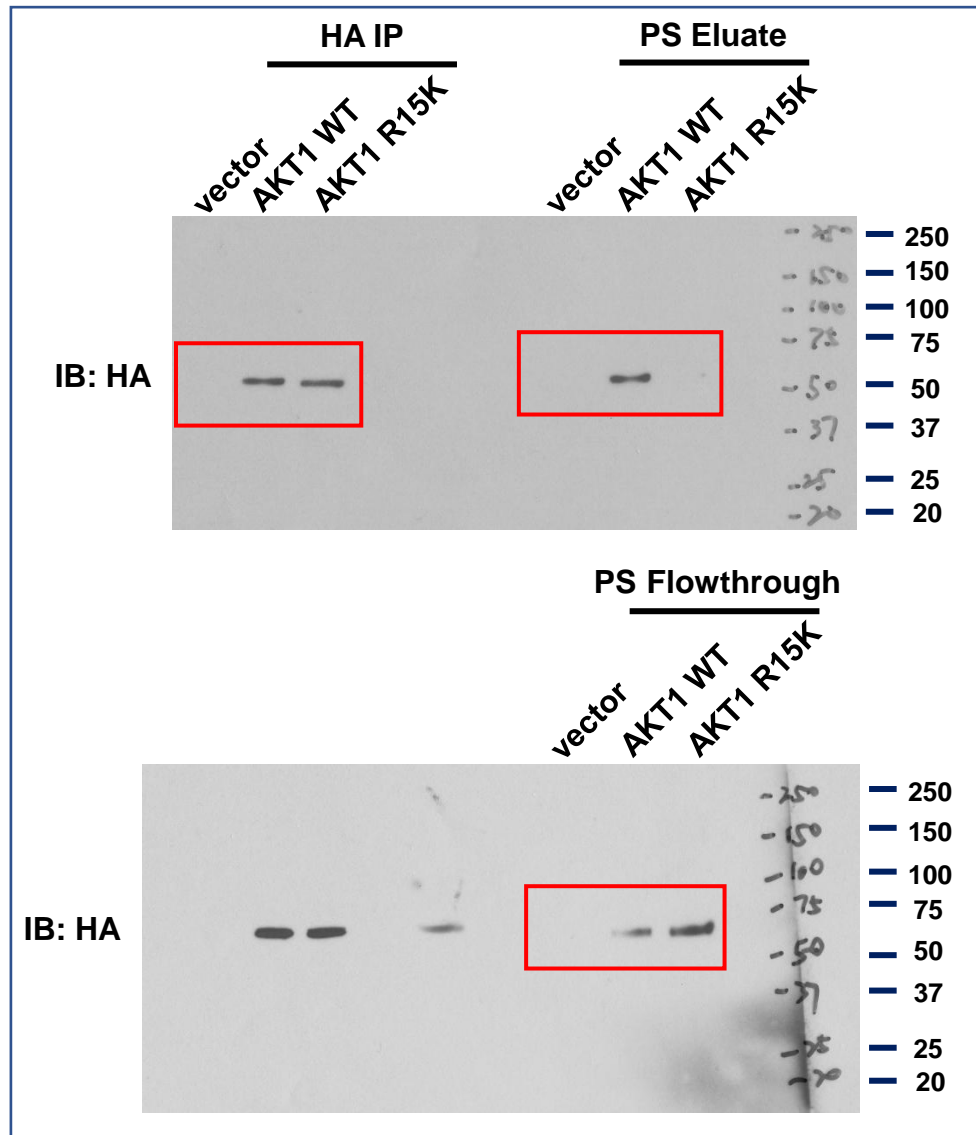

**Fig. 5e**

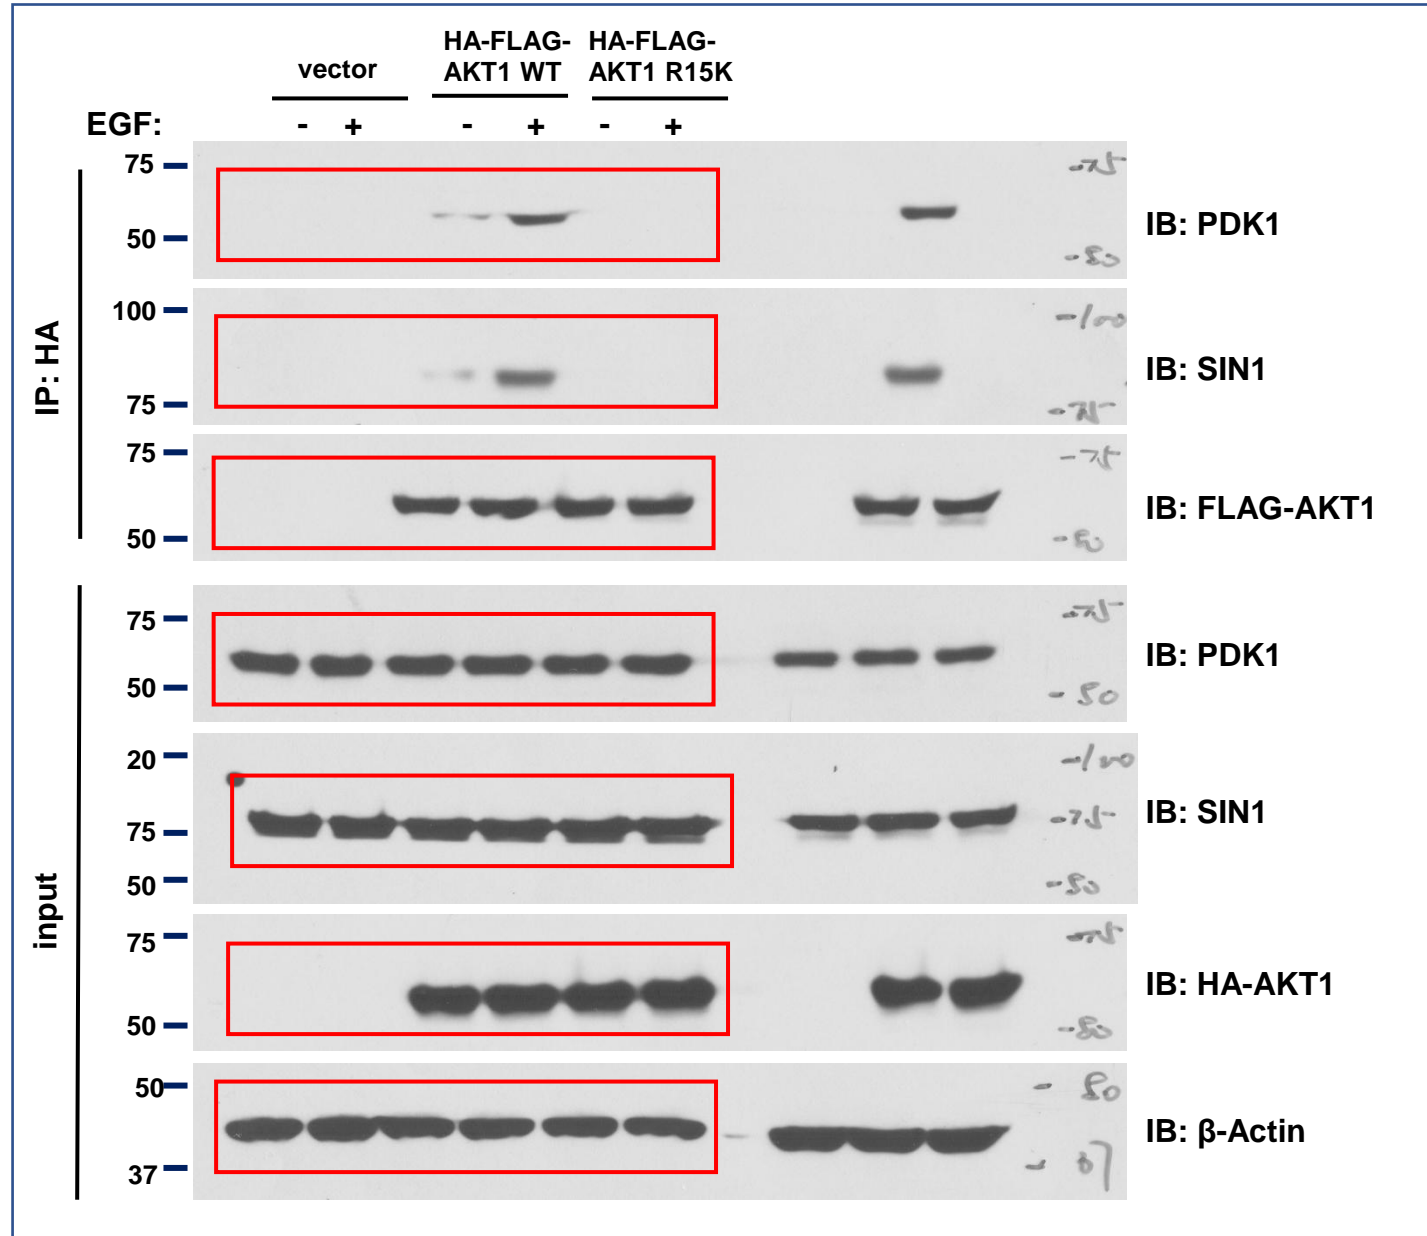

**Fig. 5f**

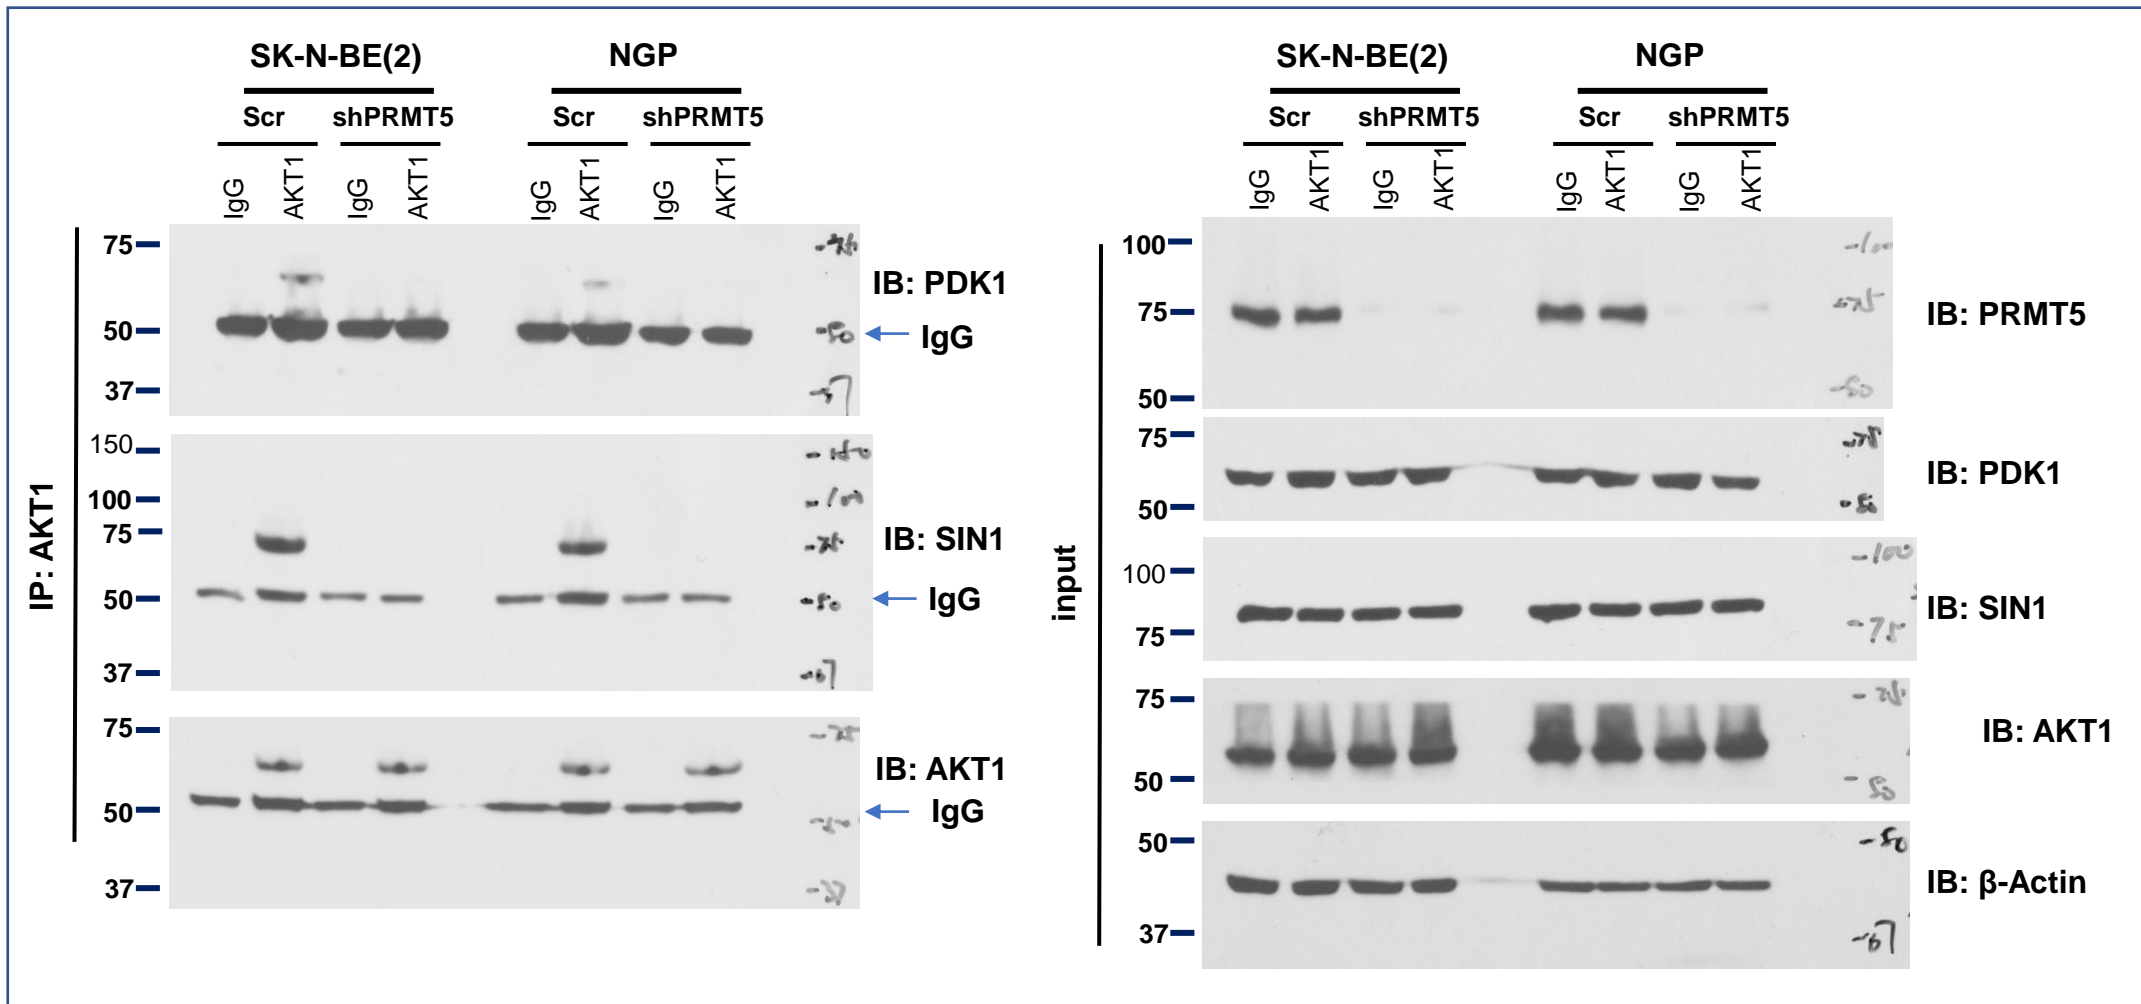



Fig. 5g

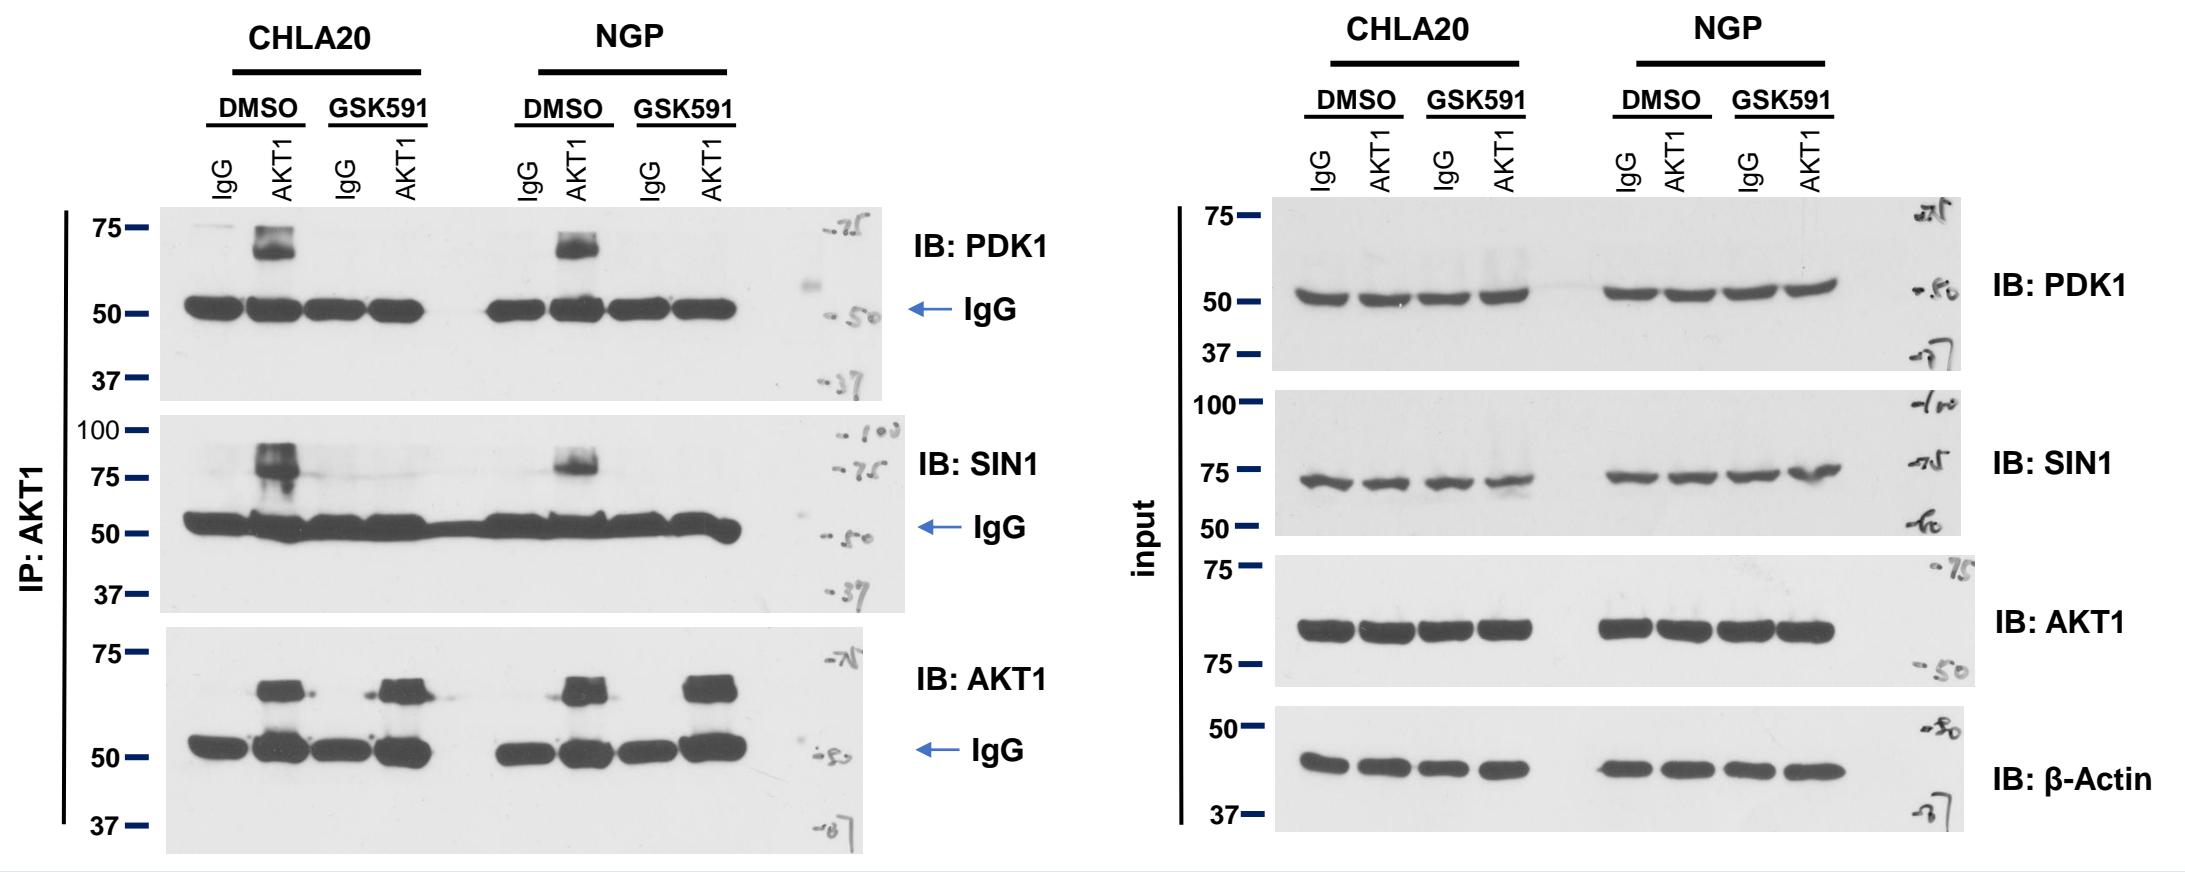

Fig. 6a

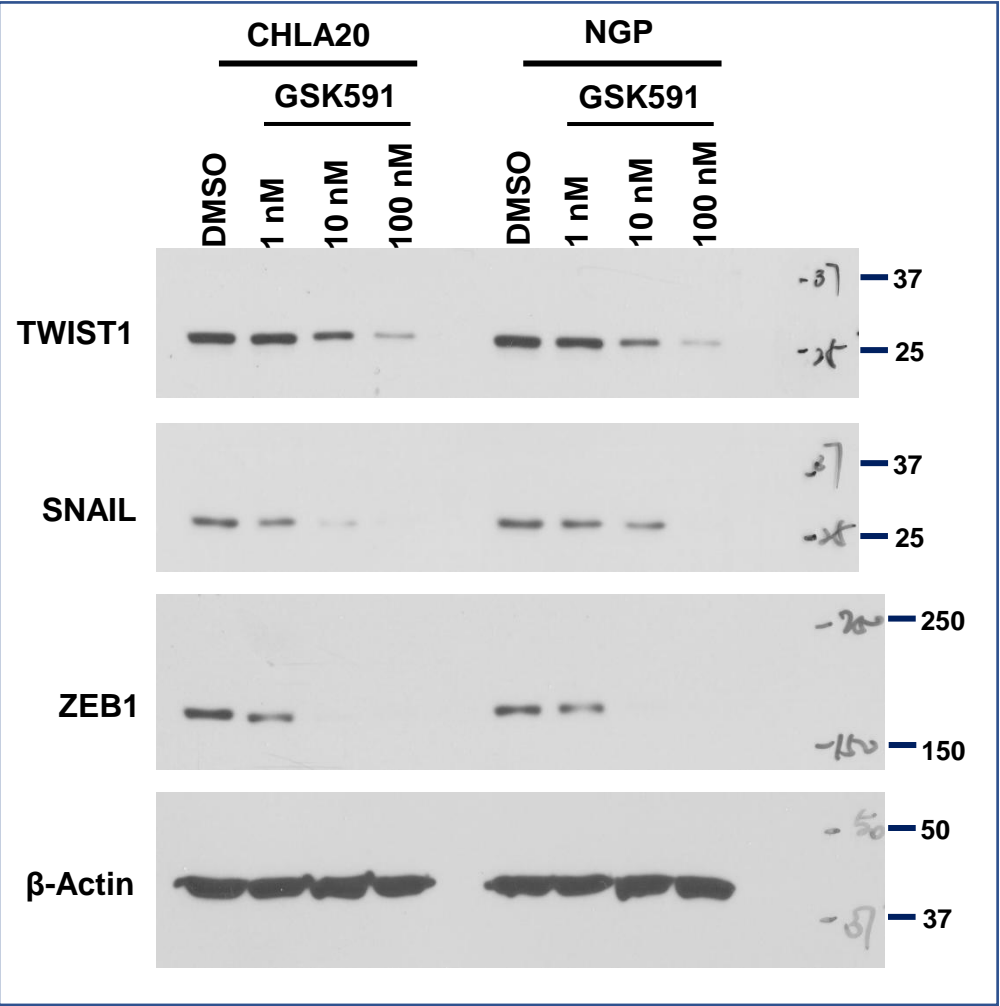

Fig. 6b\_Left

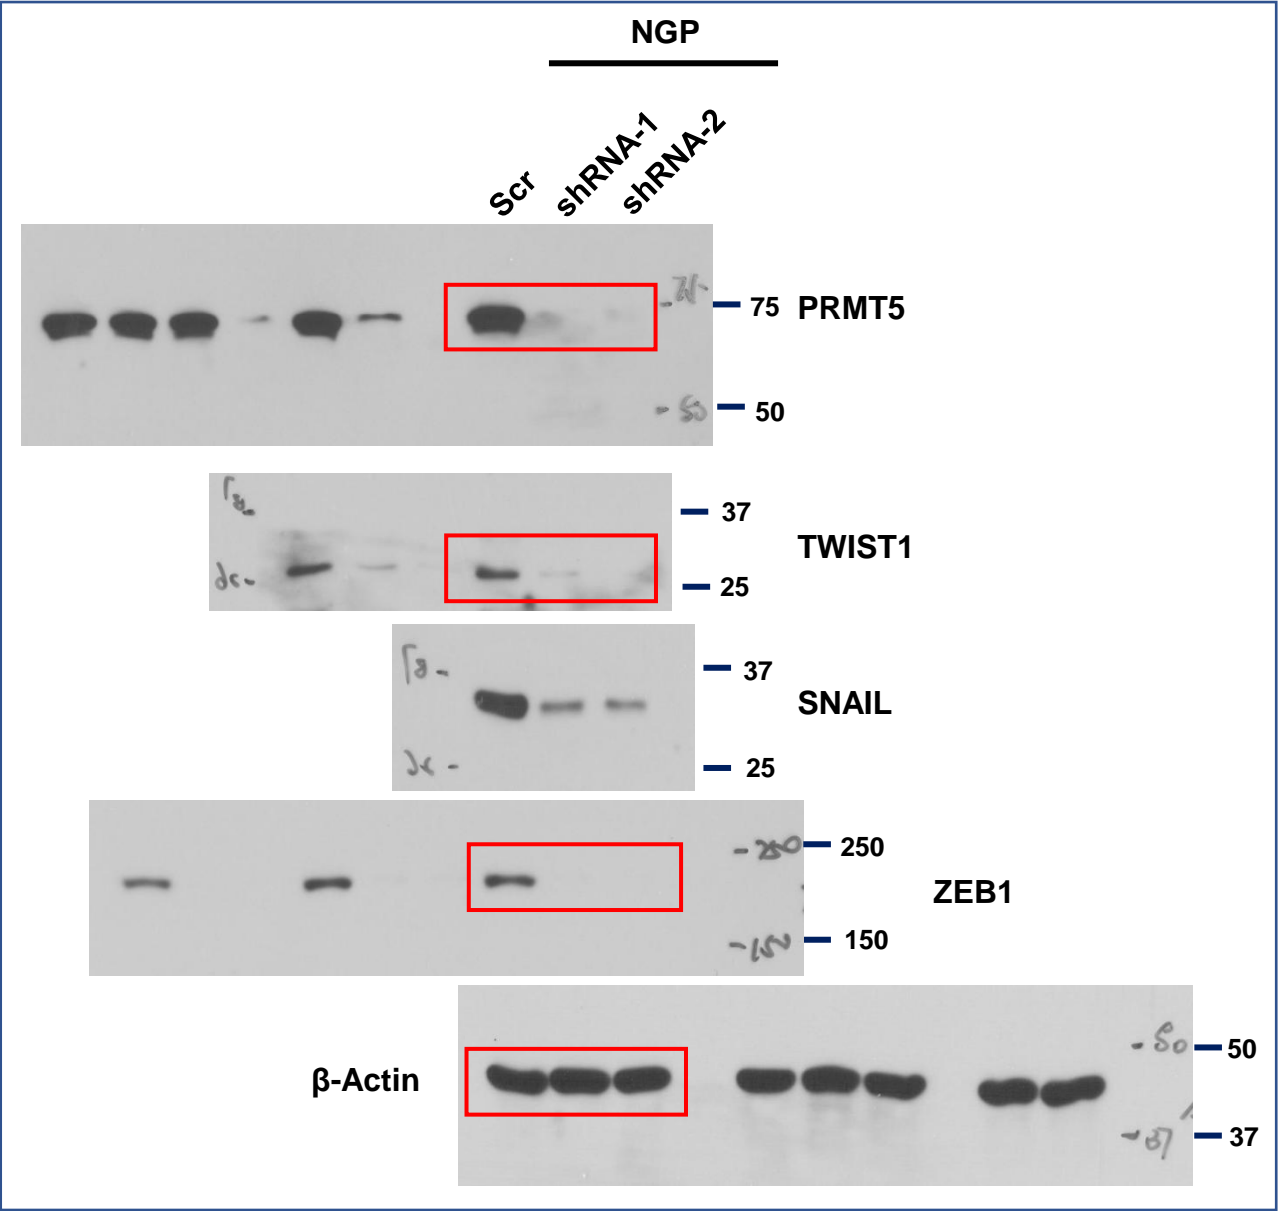

Fig. 6b\_Right

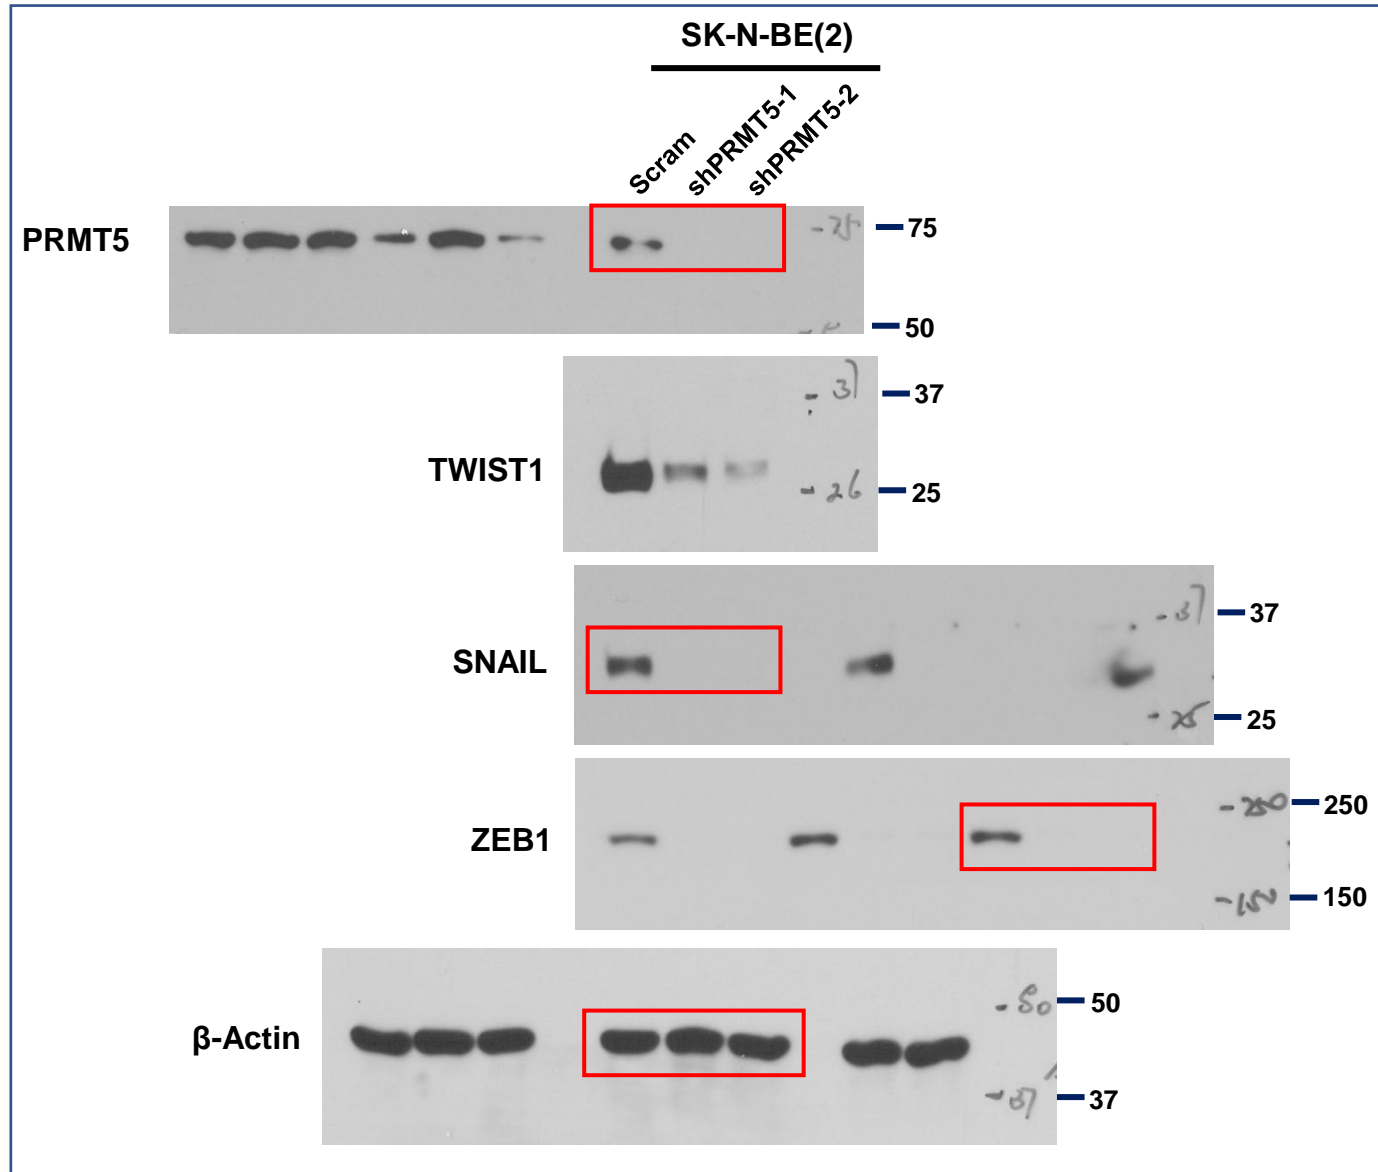

**Fig. 6c**

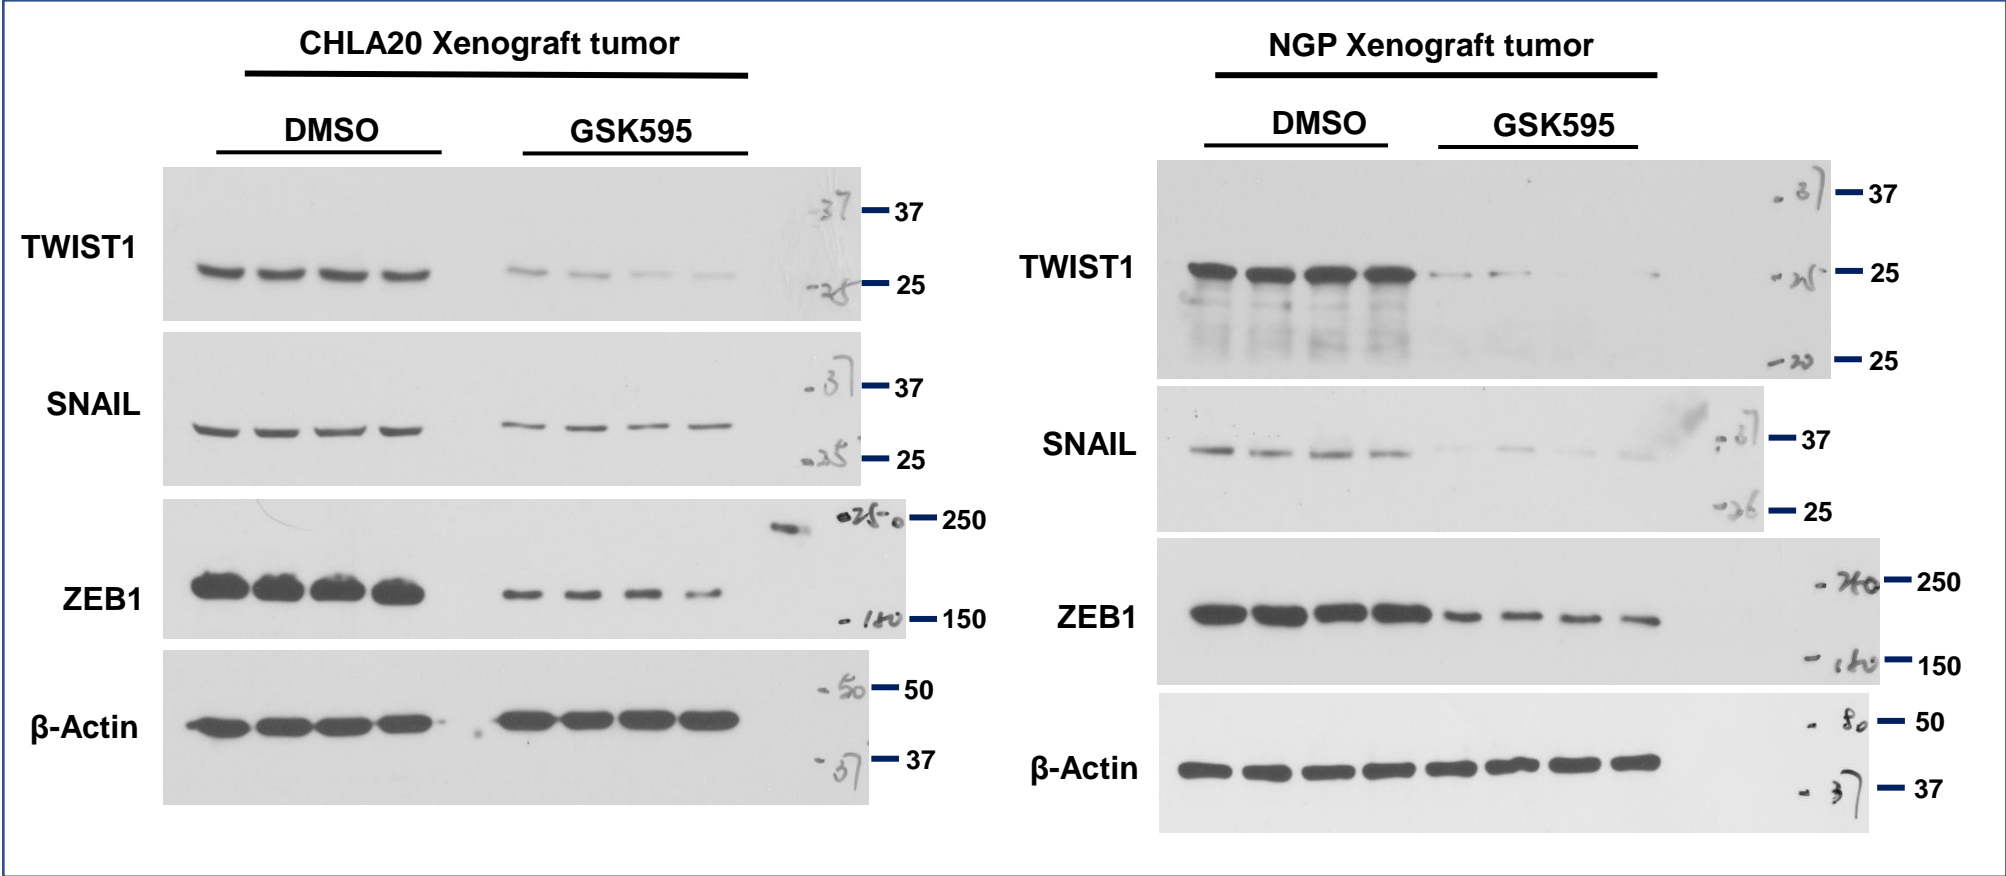

Fig. 6h

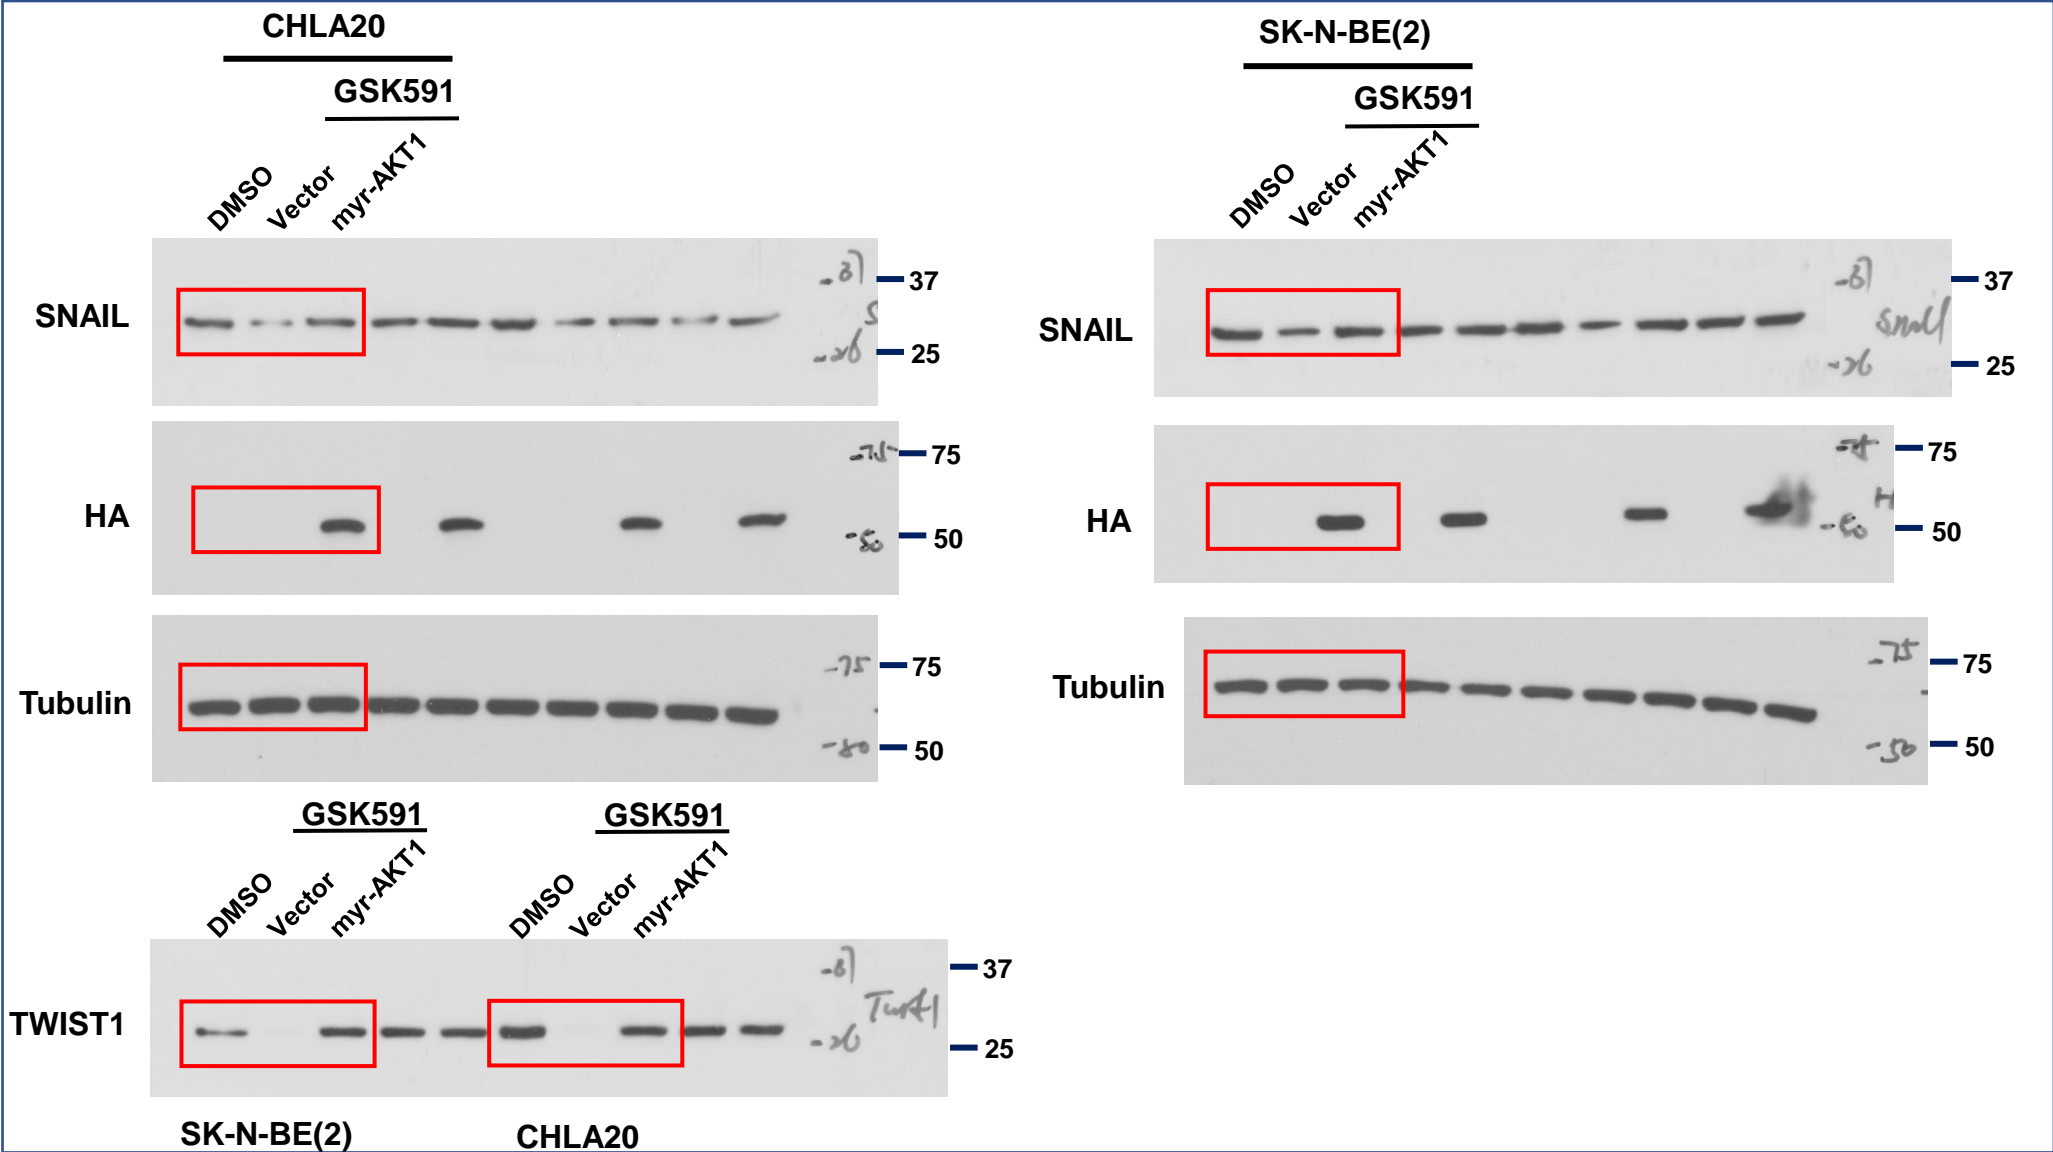

**Fig. 6i**

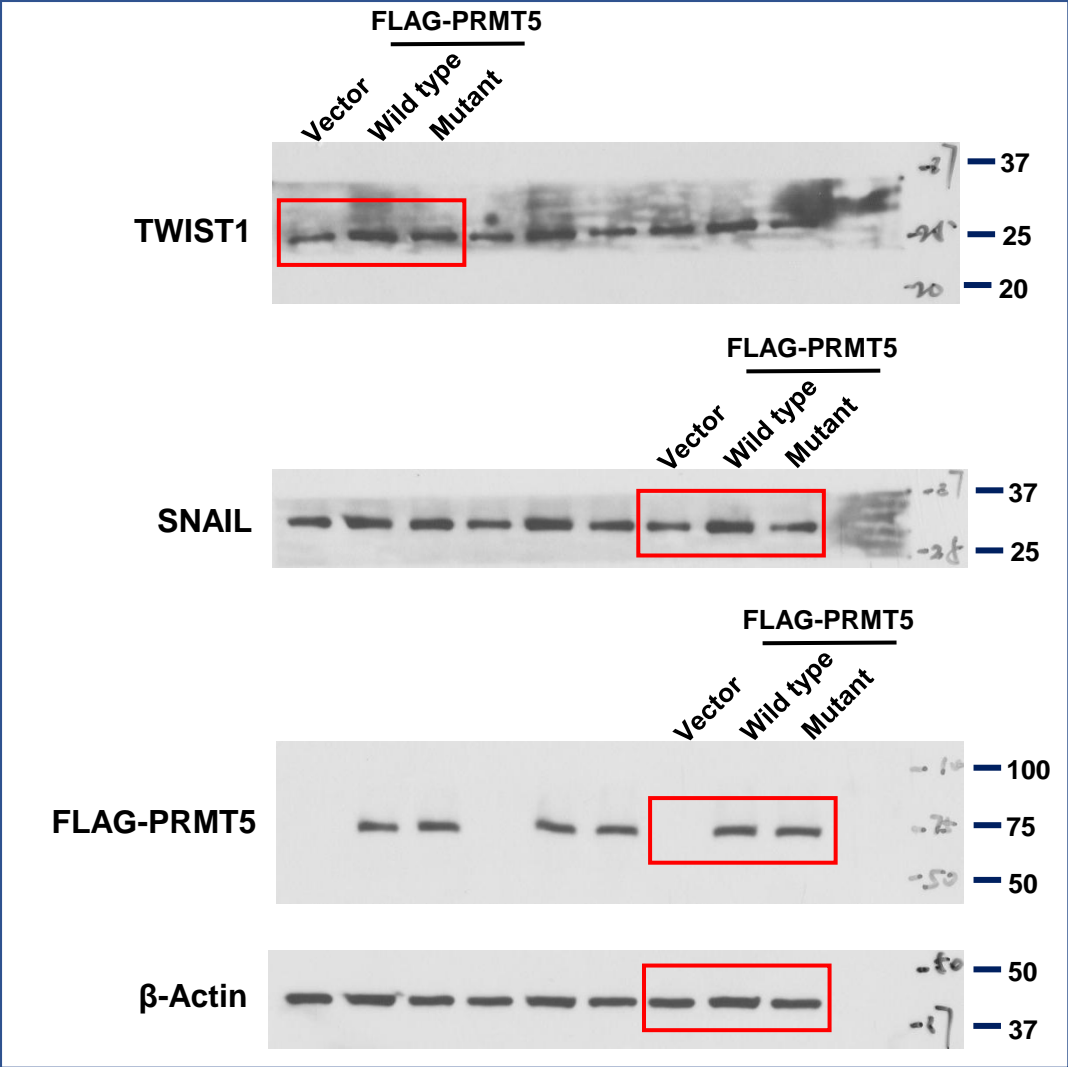

# S1a

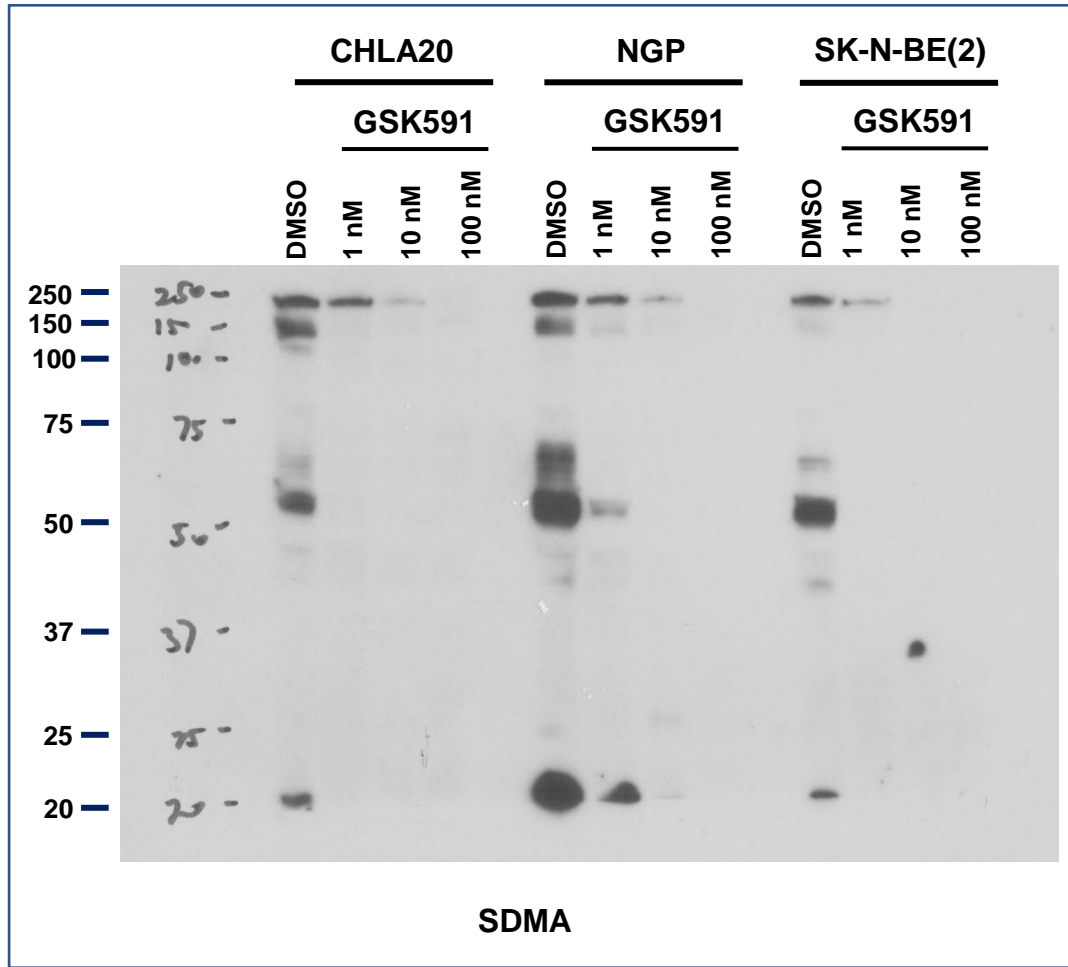

# S1b

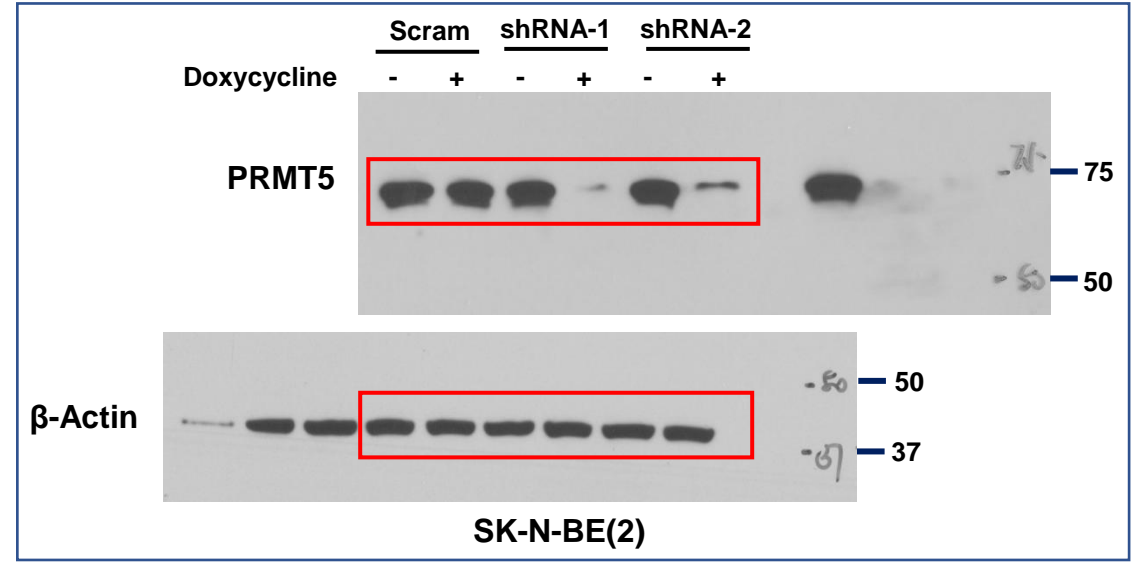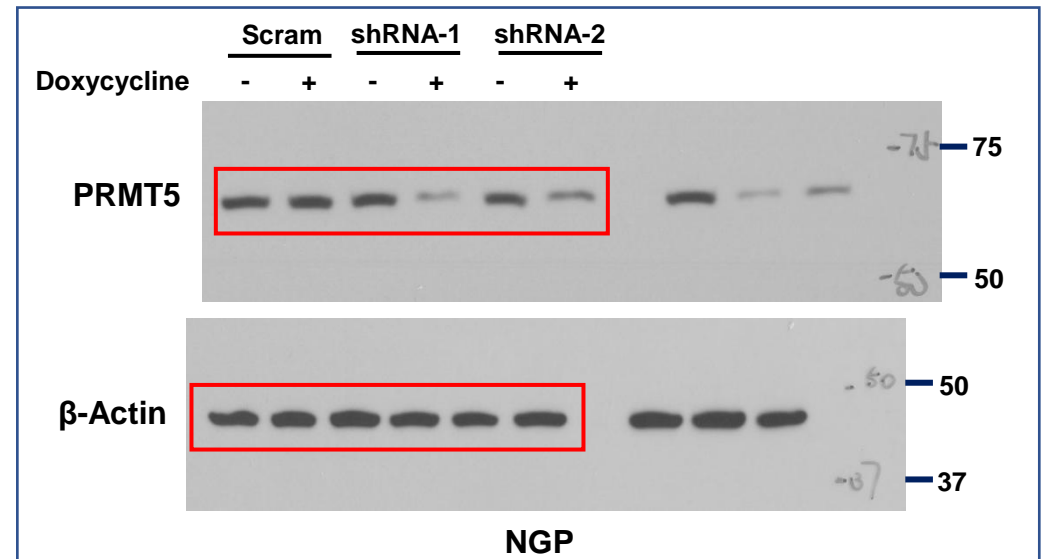

### S1c

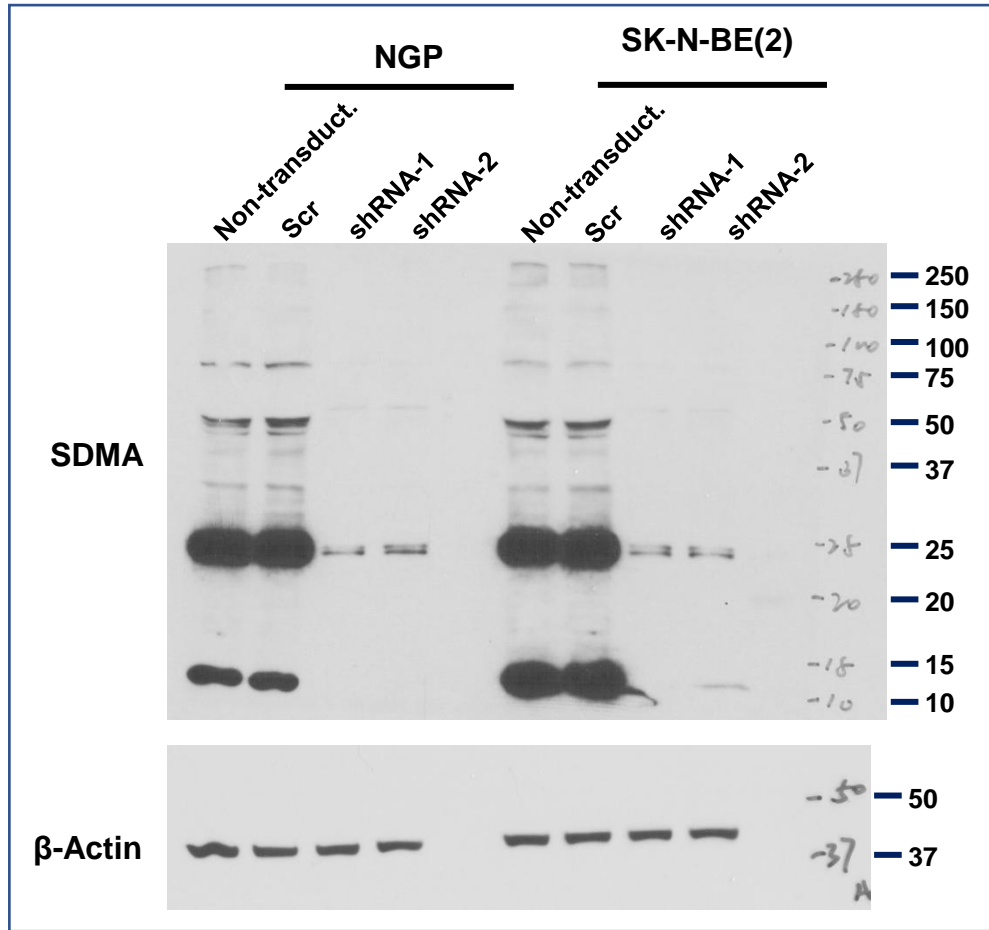

### S1d

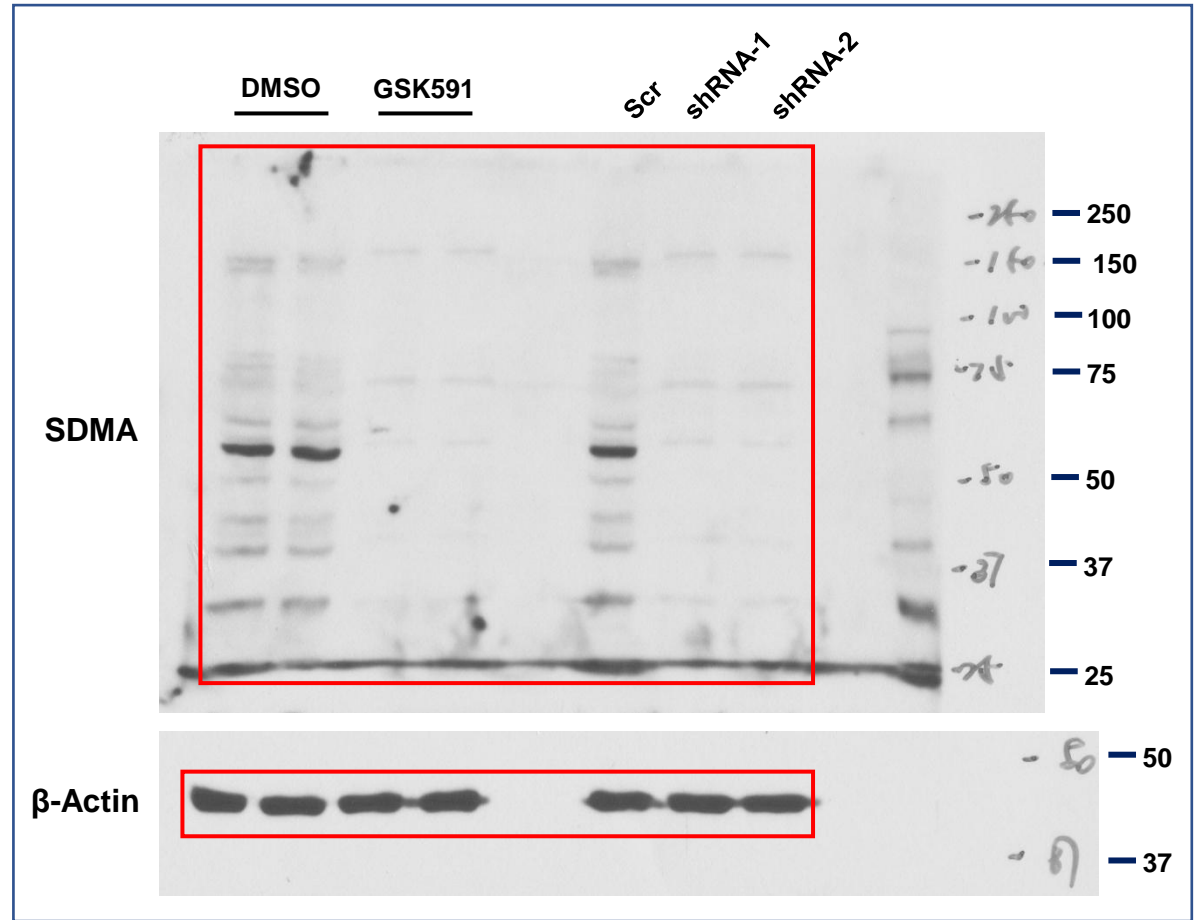



## S2b

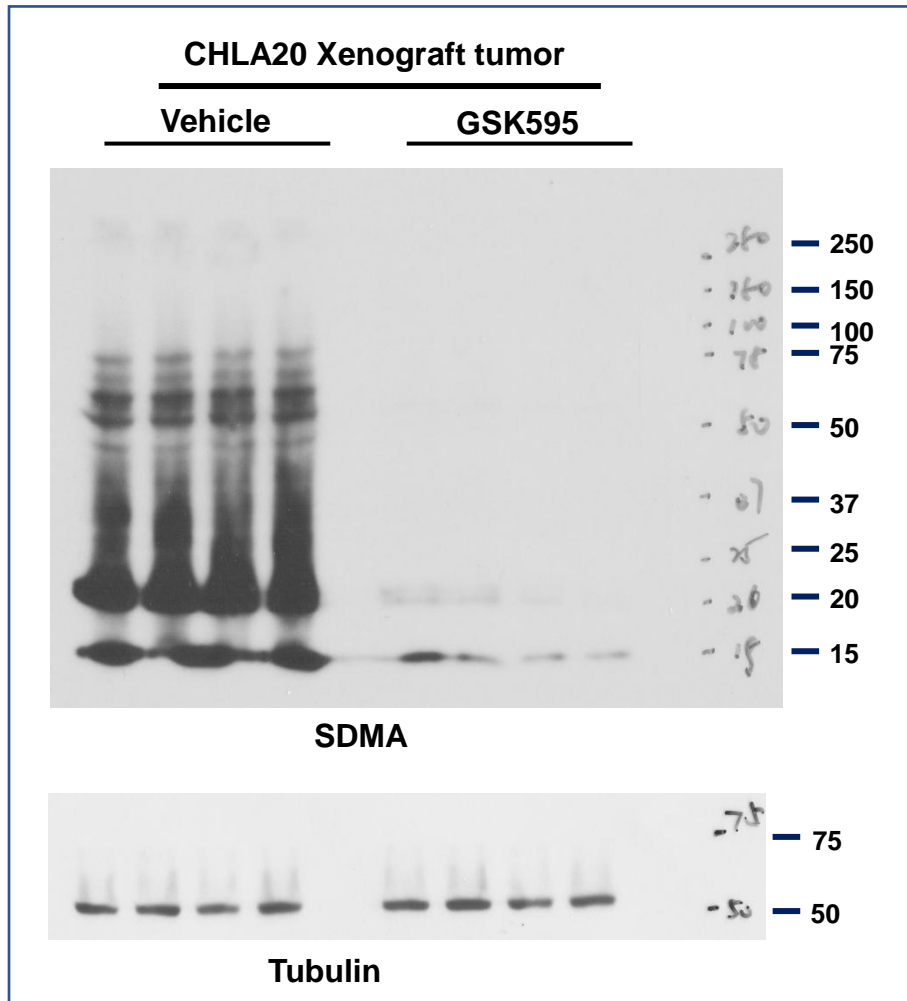

## S2c

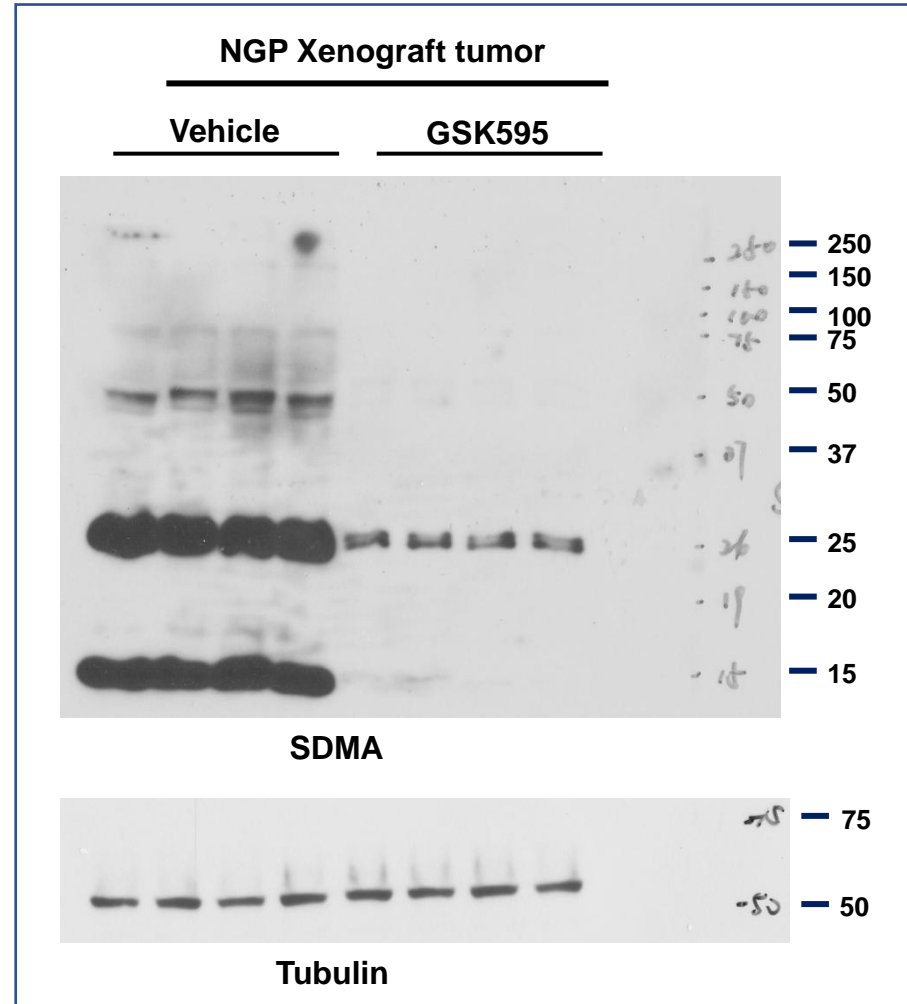

# S3b

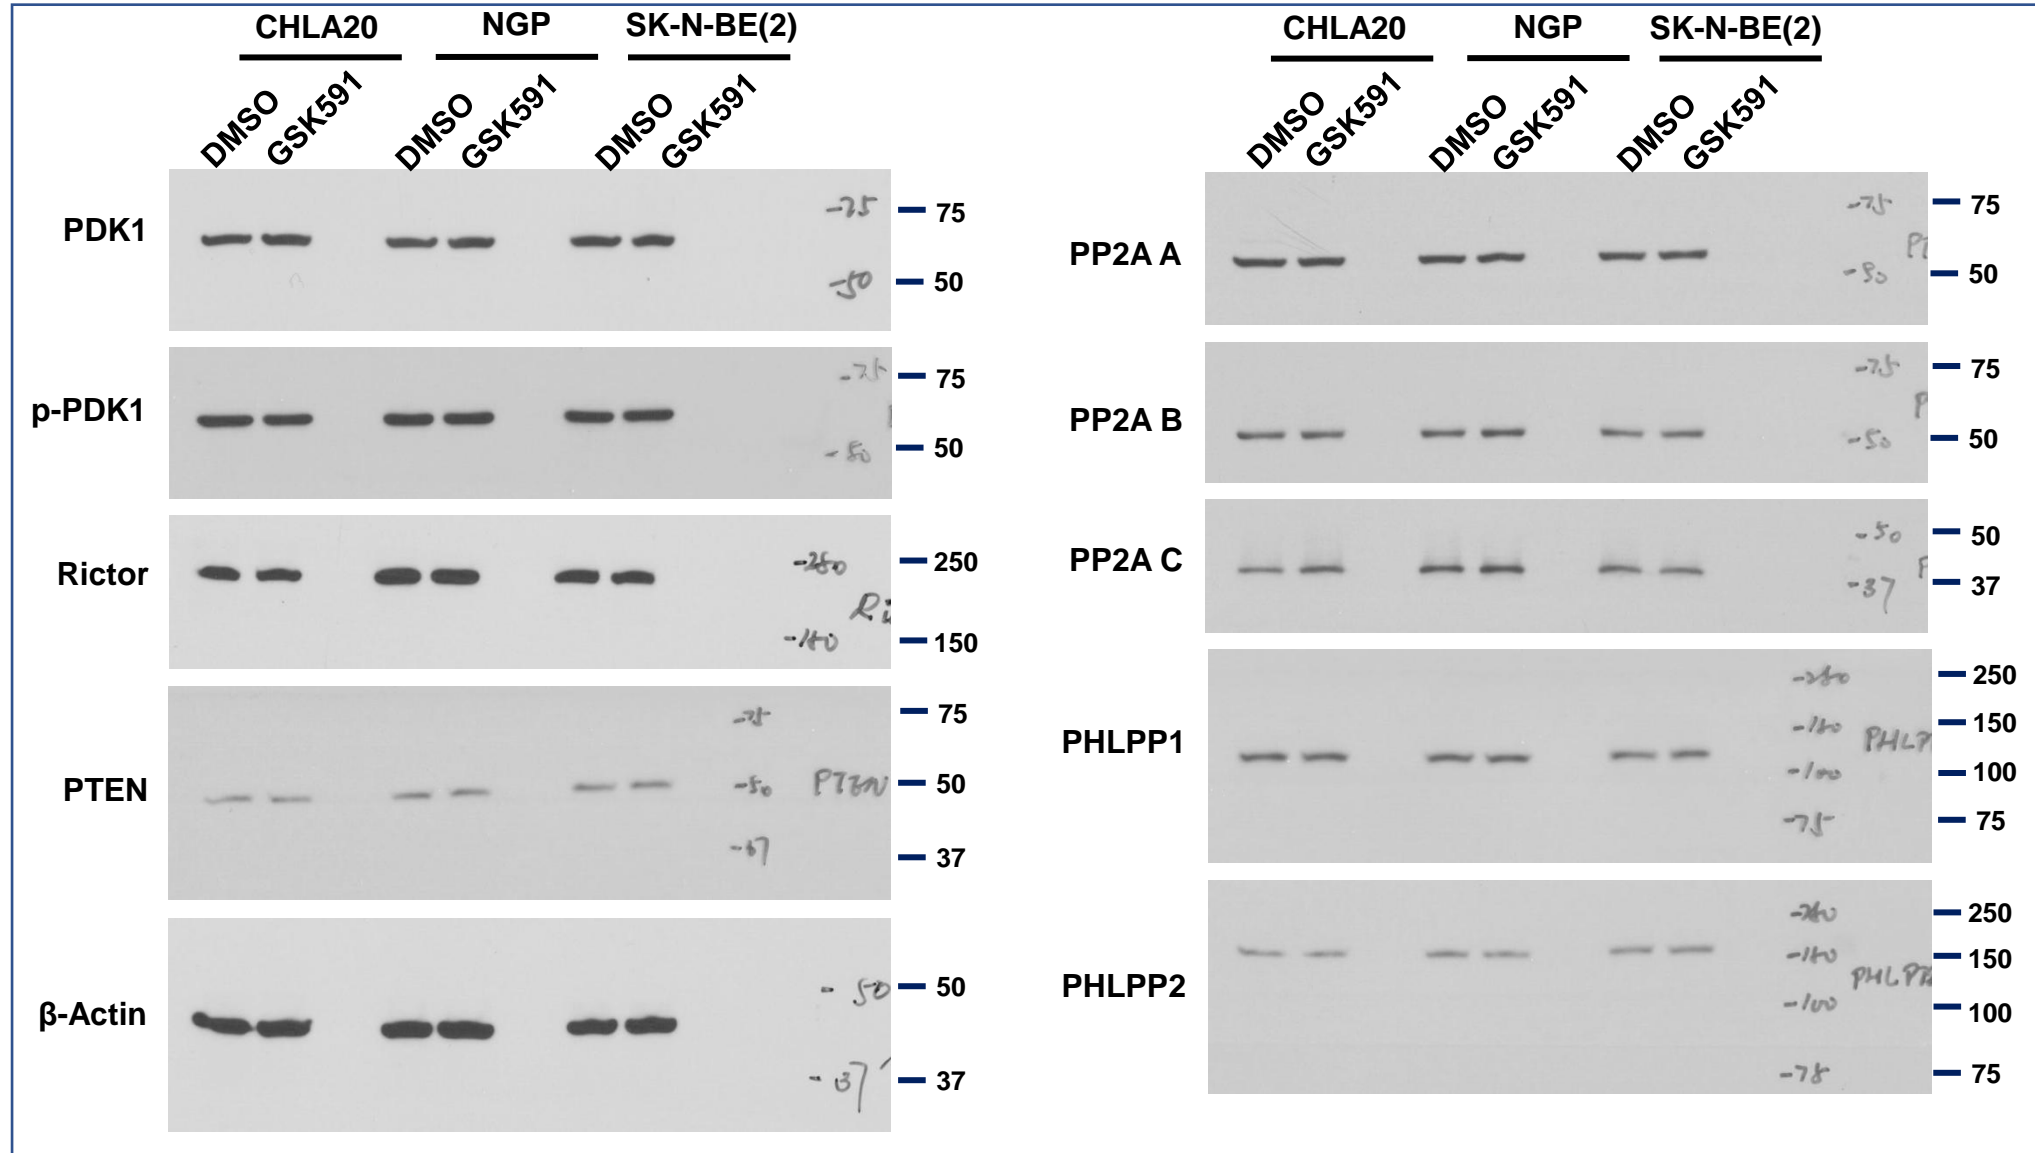



S3e

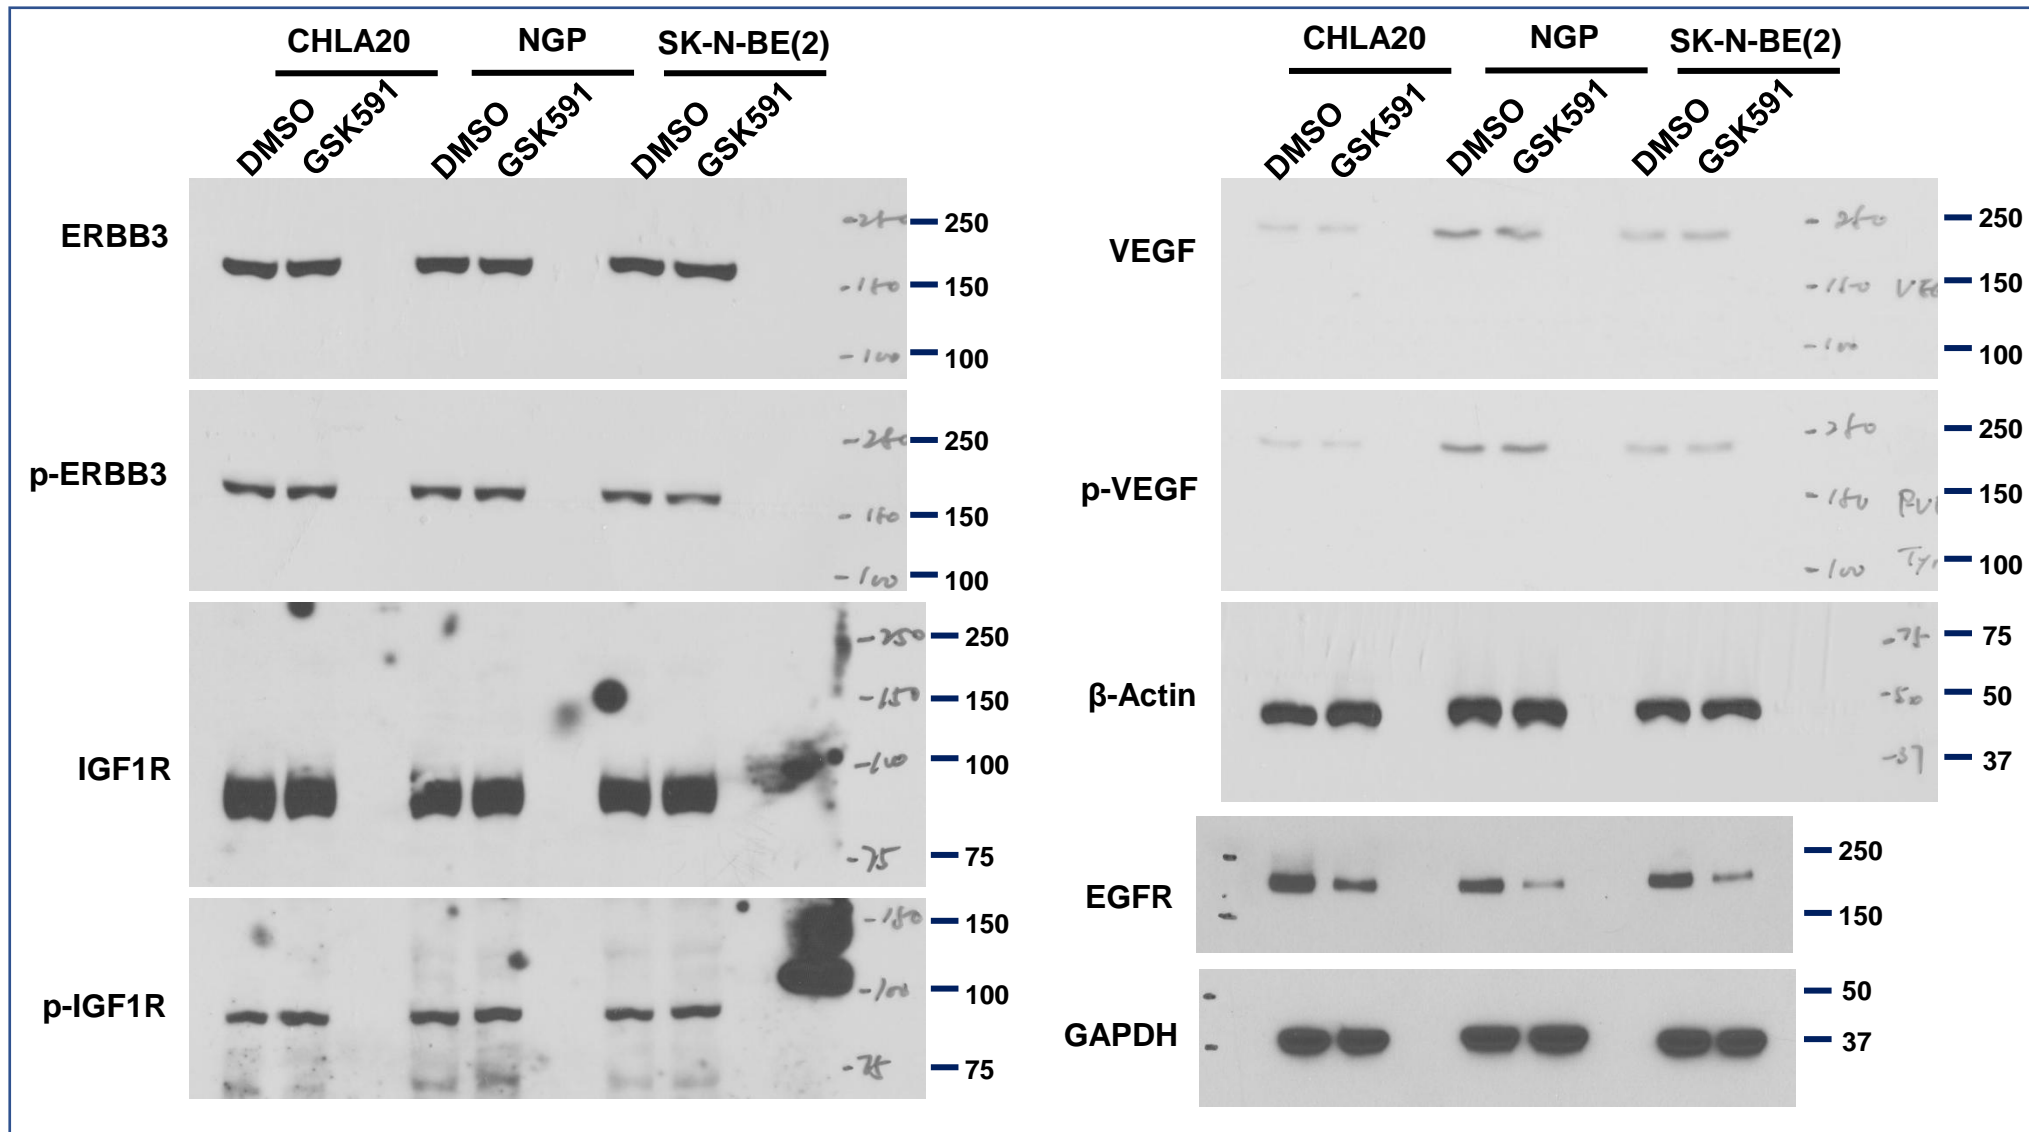



**S3g**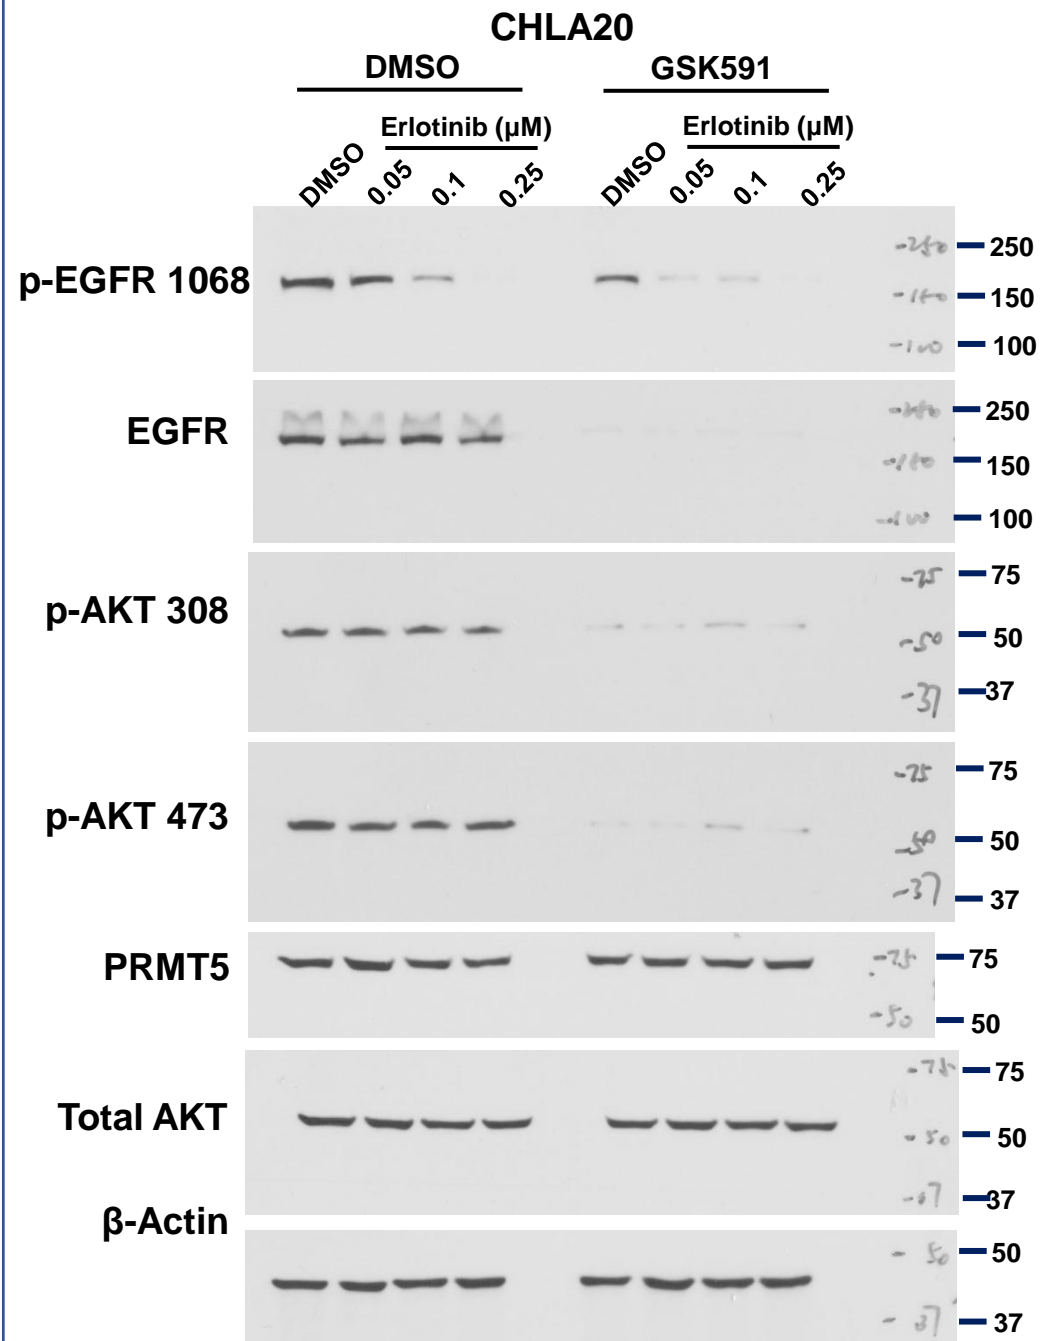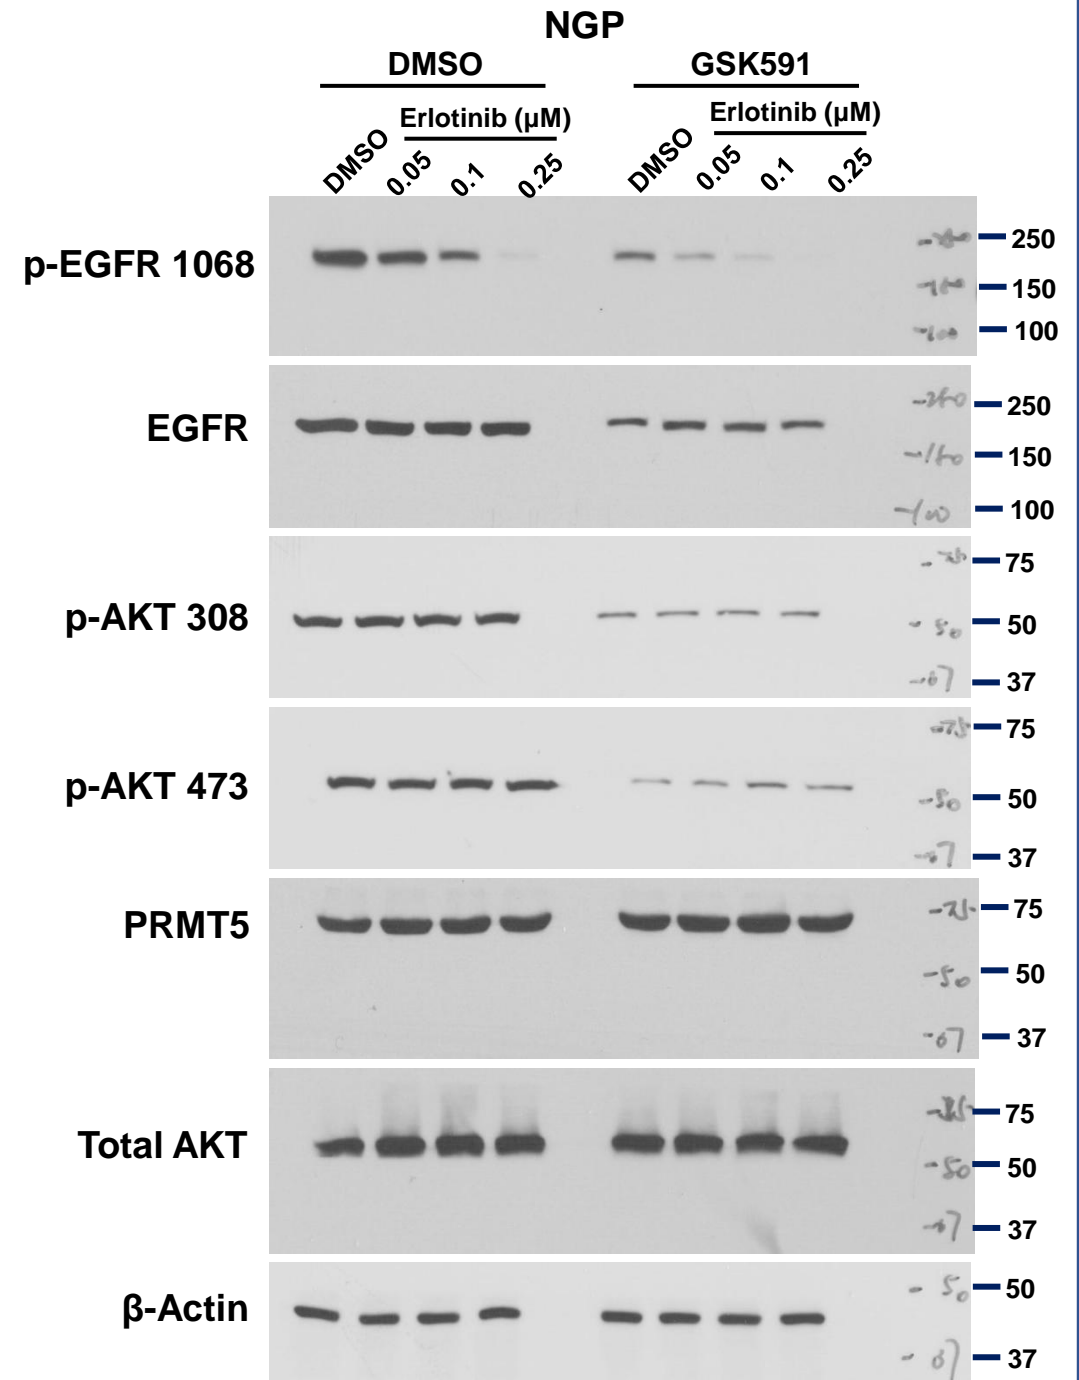

### S4a

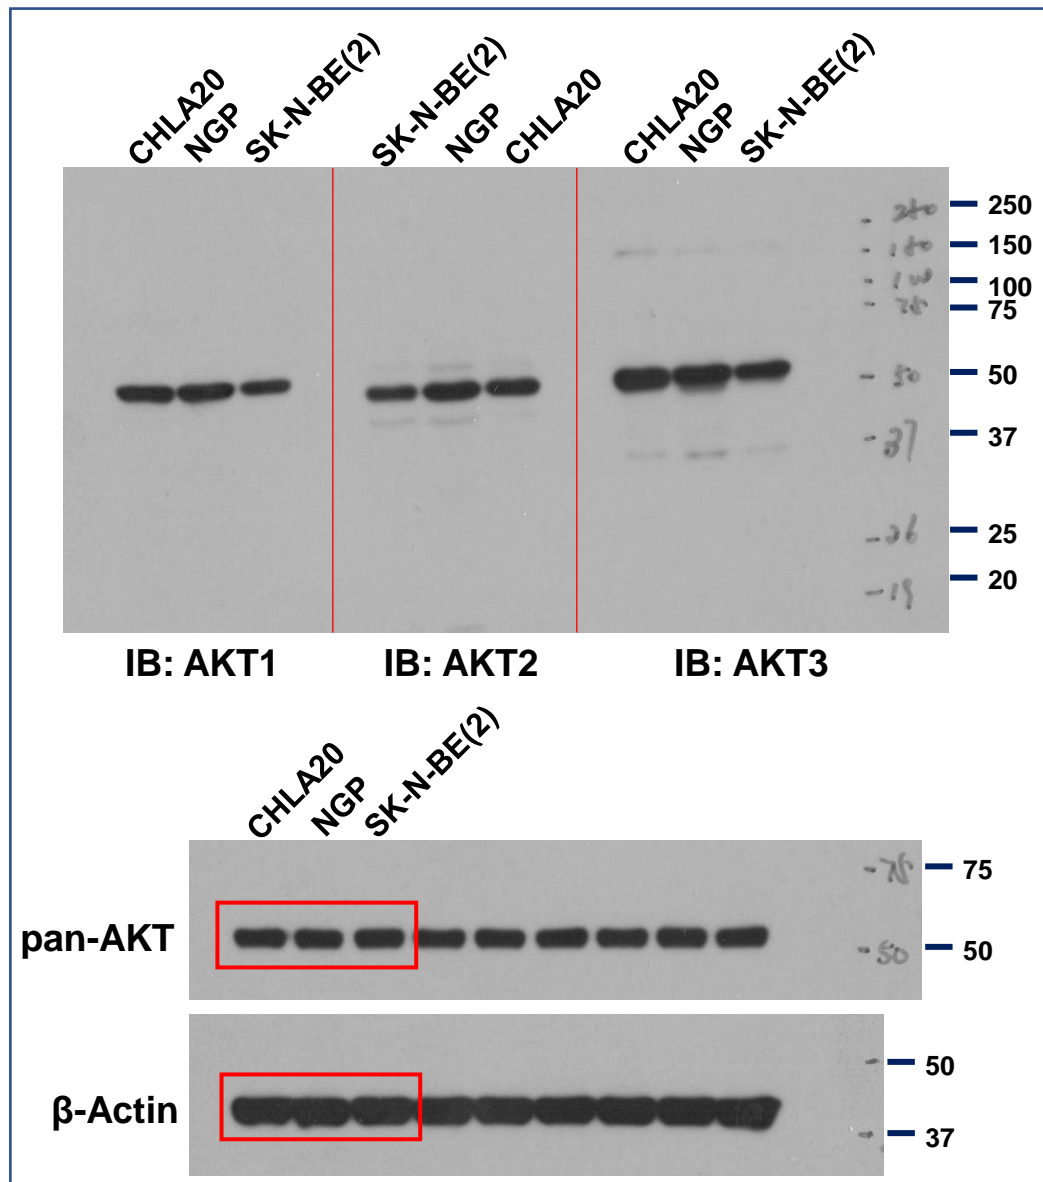

### S4b

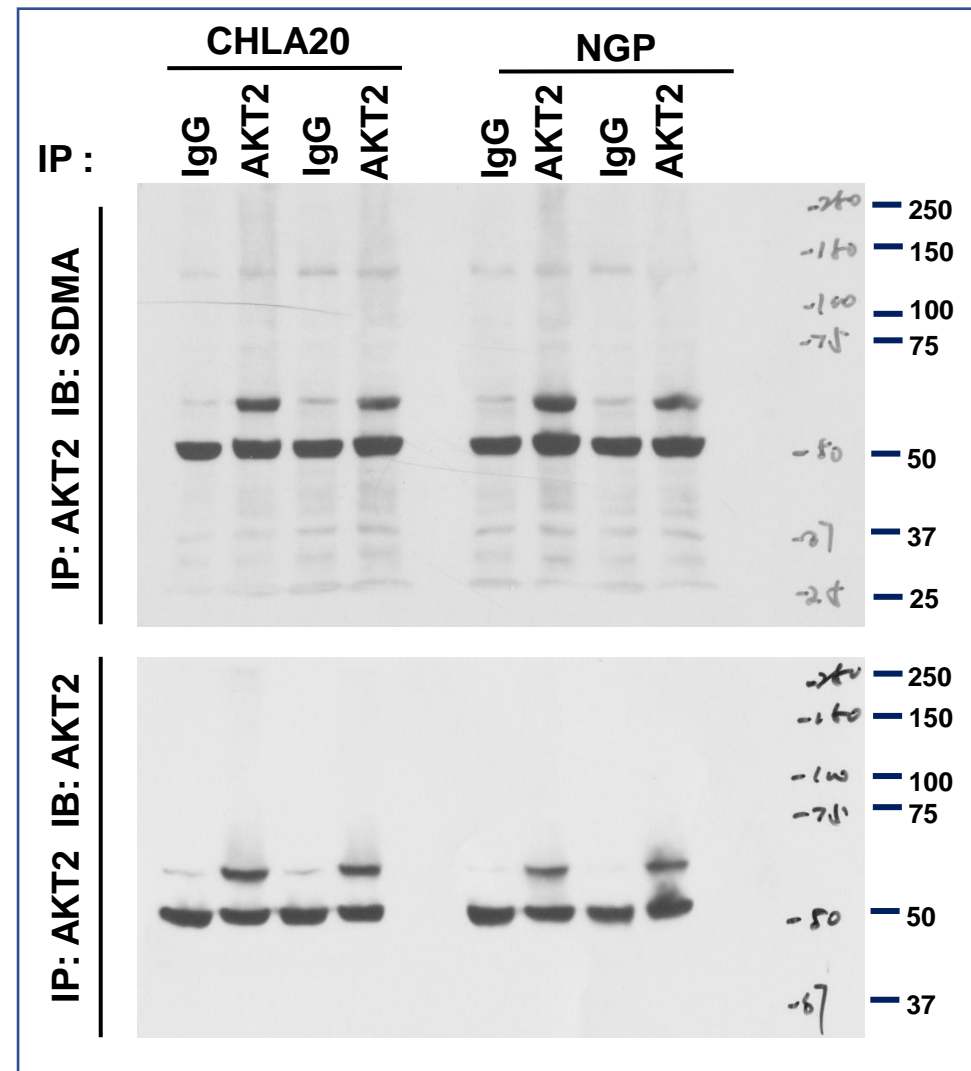

### S4c

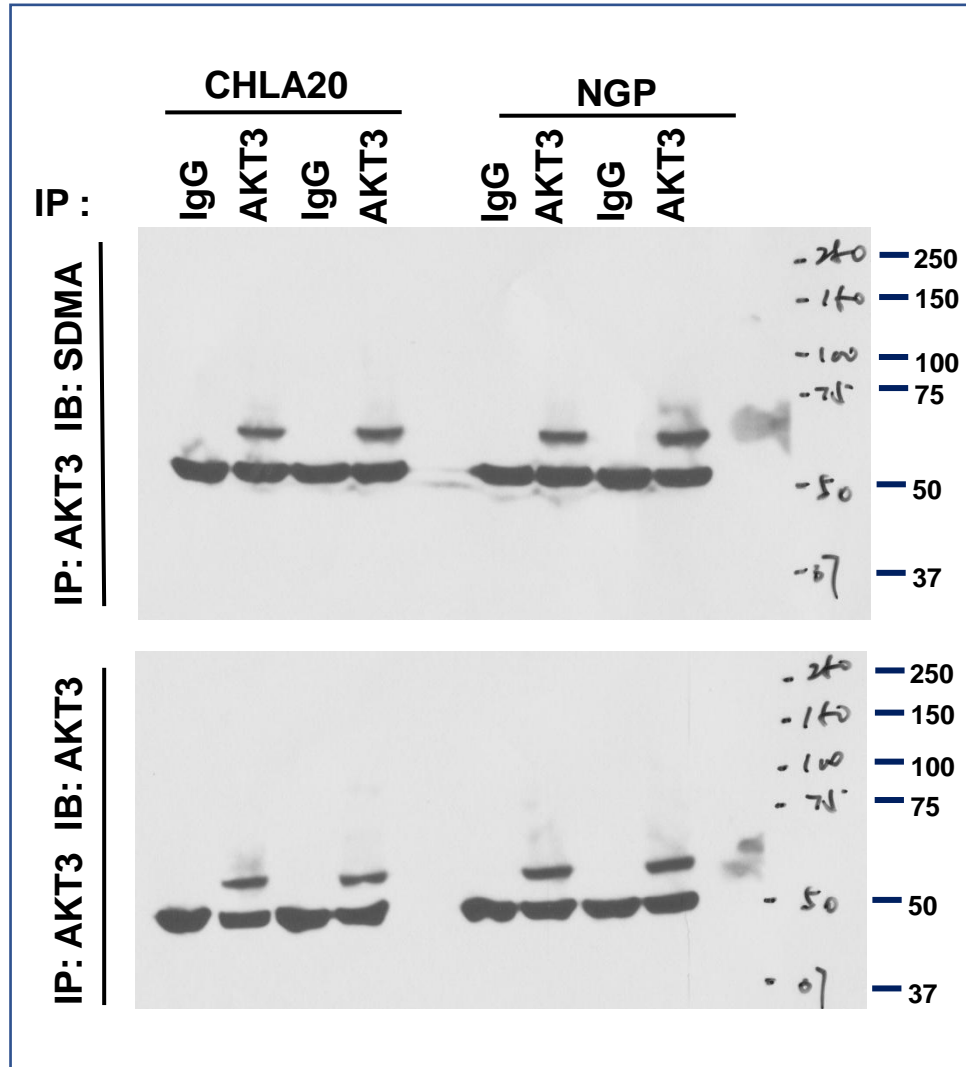

### S4d

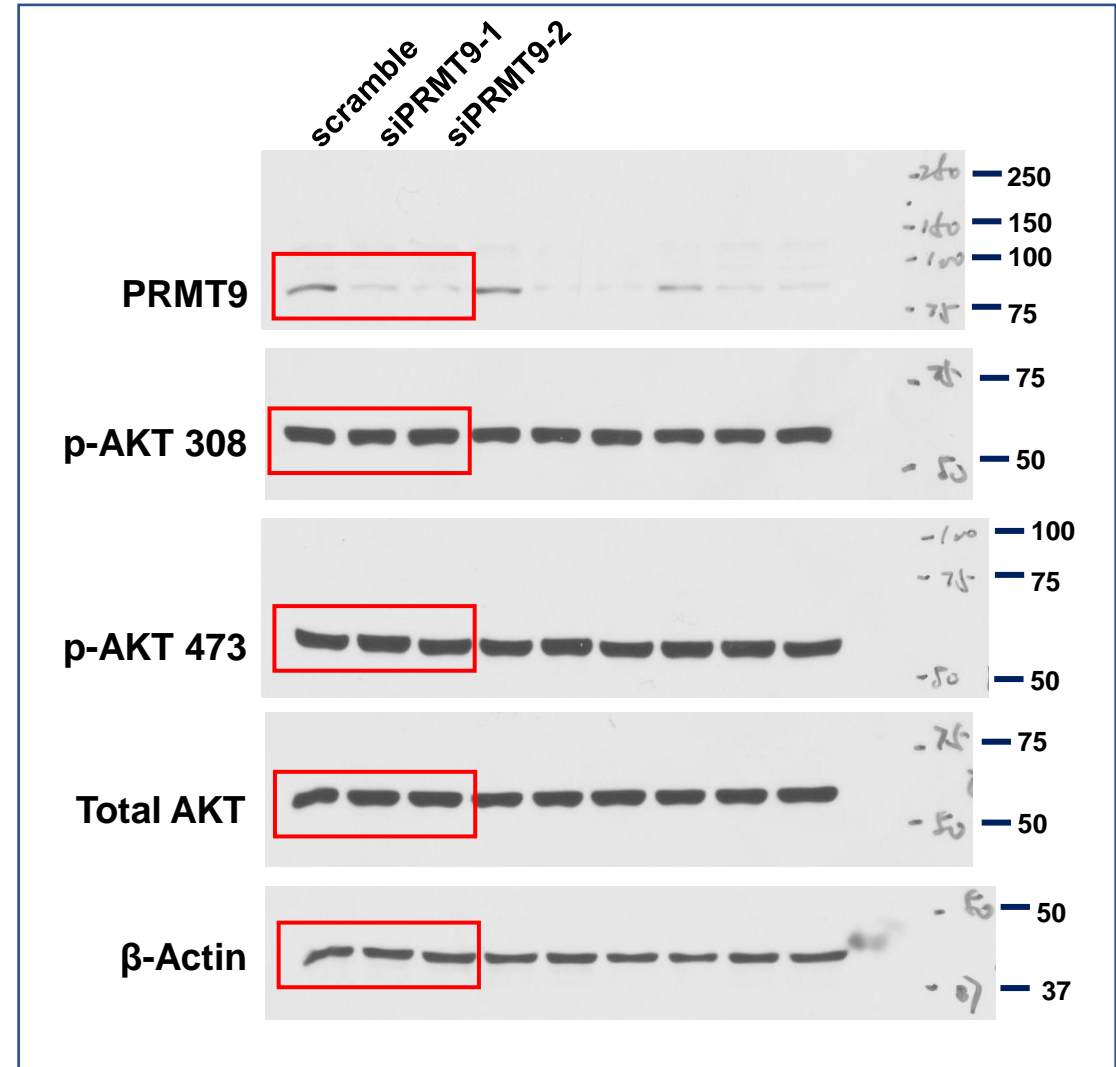



S5e

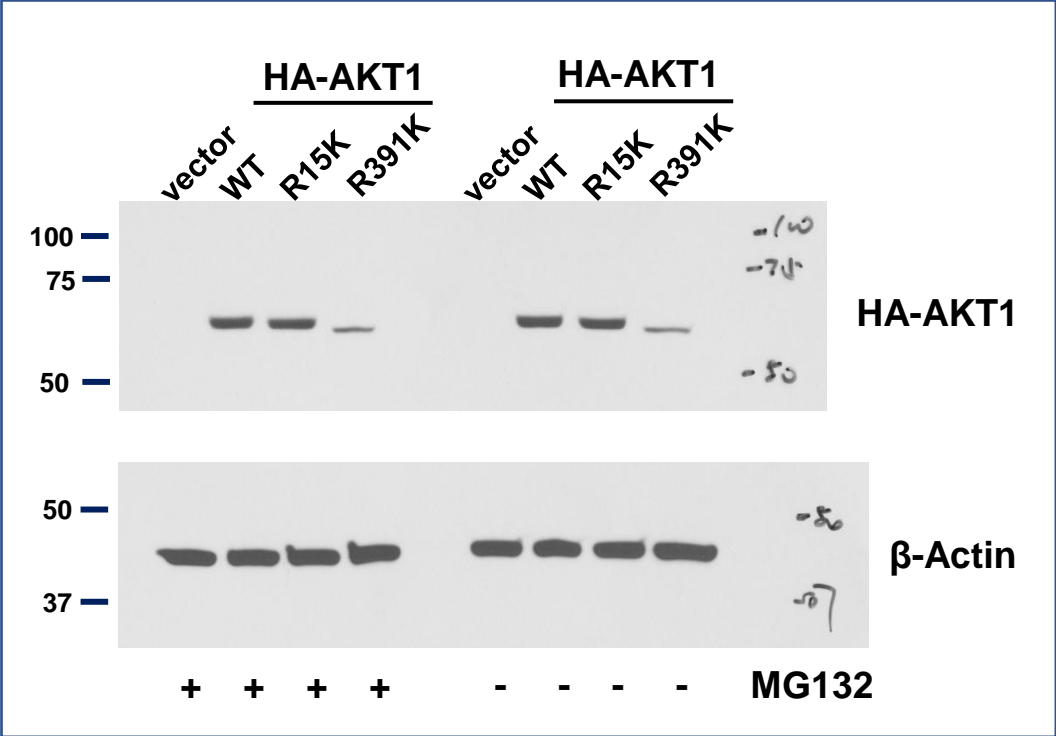

Supplement: 41467_2022_31645_MOESM1_ESM.pdf [file 41467_2022_31645_MOESM1_ESM.pdf]
